# Supplementary material for: Silver-mediated oxidative vinylic C–H bond sulfenylation of enamides with disulfides
Source: Royal Society of Chemistry journal article supplement (doi:10.1039/c4ob01970a), 2014-01-01

Electronic Supplementary Information

**Silver–Mediated Oxidative Vinylic C-H Bond Sulfenylation of  
Enamides with Disulfides**

Luo Yang,\* Qing Wen, Fuhong Xiao, Guojun Deng\*

*Key Laboratory for Environmentally Friendly Chemistry and Application of the Ministry of Education, College of Chemistry,  
Xiangtan University, Hunan, 411105, China*

*E-mail: [yangluo@xtu.edu.cn](mailto:yangluo@xtu.edu.cn); Tel: +86-731-5829-8351*

*E-mail: [gjdeng@xtu.edu.cn](mailto:gjdeng@xtu.edu.cn); Tel: +86-731-5829-8601*

**Table of Contents**

|                                                                                             |                |
|---------------------------------------------------------------------------------------------|----------------|
| <b>1. General information</b>                                                               | <b>S1-S2</b>   |
| <b>2. General experimental procedures for the synthesis of 3a-3h, 4b-4i, 5a-5e</b>          | <b>S2</b>      |
| <b>3. Detailed optimization of the oxidative vinylic C-H sulfenylation</b>                  | <b>S2-S3</b>   |
| <b>4. Radical trapping experiments</b>                                                      | <b>S3-S4</b>   |
| <b>5. The determination of the stereochemistry of product 4i</b>                            | <b>S5</b>      |
| <b>6. Characterization data of products 3a-3h, 4b-4i, 5a-5e</b>                             | <b>S6-S12</b>  |
| <b>7. Copies of <sup>1</sup>H NMR and <sup>13</sup>C NMR spectra of 3a-3h, 4b-4i, 5a-5e</b> | <b>S13-S55</b> |

**1. General information**

Thin-layer chromatography (TLC) was performed using E. Merck silica gel 60 F254 precoated plates (0.25 mm) or Sorbent Silica Gel 60 F254 plates. The developed chromatography was analyzed by UV lamp (254 nm). High-resolution mass spectra (HRMS) were obtained from a JEOL JMS-700 instrument (ESI). GC-MS (EI) were collected on a Agilent 7890-5973 instrument. Elemental analyses were performed at the Analytical Laboratory of the Xiangtan University. Melting points are uncorrected. Nuclear magnetic resonance (NMR) spectra were recorded on a Bruker Avance 400 spectrometer at ambient temperature. Chemical shifts for <sup>1</sup>H NMR spectra are reported in parts per million (ppm) from tetramethylsilane with the solvent resonance as the internal standard (chloroform: δ 7.26 ppm). Chemical shifts for <sup>13</sup>C NMR spectra are reported in parts per million (ppm) from tetramethylsilane with the solvent as the internal standard (CDCl<sub>3</sub>: δ

77.16 ppm). Data are reported as following: chemical shift, multiplicity (s = singlet, d = doublet, dd = doublet of doublets, t = triplet, q = quartet, m = multiplet, br = broad signal), coupling constant (Hz), and integration.

**Reagents:** Unless stated otherwise, substituted disulfides were synthesized from the corresponding thiophenol with H<sub>2</sub>O<sub>2</sub> in CH<sub>3</sub>CN/H<sub>2</sub>O.<sup>1</sup> Enamides were synthesized starting from ketones according to the method reported by S. M. Weinreb *et. al.*<sup>2</sup> AgOAc and other reagents were purchased and used directly.

## 2. General experimental procedures for the synthesis of 3a-3h, 4b-4i, 5a-5e

An oven-dried reaction vessel was charged with enamide **1** (0.2 mmol), dichloroethane (DCE, 0.6 mL), disulfide **2** (0.4 mmol), AgOAc (1.2 equiv, 0.24 mmol) under argon atmosphere. The vessel was sealed and heated at 125°C for 24 h. The resulting mixture was cooled to room temperature, transferred to silica gel column and eluted with petroleum ether and ethyl acetate (4:1) to give the desired sulfenylation products **3**.

## 3. Detailed optimization of the oxidative vinylic C-H sulfenylation

**Table S1** Detailed optimization of the oxidative vinylic C-H sulfenylation

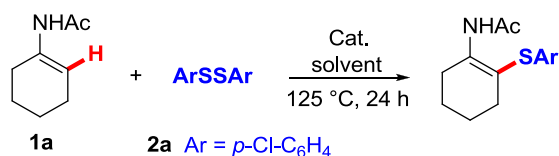

| entry          | Cat. (equiv)                          | solvent    | yield [%] <sup>b</sup> |
|----------------|---------------------------------------|------------|------------------------|
| 1              | Cu(OTf) <sub>2</sub> (0.1)            | DCE        | 15                     |
| 2              | Pd(OAc) <sub>2</sub> (0.1)            | DCE        | 32                     |
| 3              | AgOAc (0.1)                           | DCE        | 21                     |
| 4              | AgOAc (1.0)                           | DCE        | 76                     |
| <b>5</b>       | <b>AgOAc (1.2)</b>                    | <b>DCE</b> | <b>82</b>              |
| 6              | Ag <sub>2</sub> O (1.2)               | DCE        | 17                     |
| 7              | Ag <sub>2</sub> CO <sub>3</sub> (1.2) | DCE        | 36                     |
| 8 <sup>c</sup> | AgOAc (1.2)                           | DCE        | 68                     |
| 9 <sup>d</sup> | AgOAc (1.2)                           | DCE        | 47                     |

<sup>1</sup> V. Kesavan, D. Bonnet-Delpon, J.-P. Begue, *Synthesis* **2000**, 223-225.

<sup>2</sup> C. Sun, S. M. Weinreb, *Synthesis* **2006**, 3585-3588.

|                 |                            |                |    |
|-----------------|----------------------------|----------------|----|
| 10              | AgOAc (1.2)                | PhCl           | 38 |
| 11              | AgOAc (1.2)                | Toluene        | 44 |
| 12              | AgOAc (1.2)                | THF            | 26 |
| 13              | AgOAc (1.2)                | <i>t</i> -BuOH | 14 |
| 14              | AgOAc (1.2)                | DMF            | 60 |
| 15              | CuI (0.1)                  | DCE            | 4  |
| 16              | CuCl (0.1)                 | DCE            | 5  |
| 17              | CuCl <sub>2</sub> (0.1)    | DCE            | <2 |
| 18              | Cu(OAc) <sub>2</sub> (0.1) | DCE            | 6  |
| 19              | AgOTf (0.1)                | DCE            | 12 |
| 20              | AgBF <sub>4</sub> (0.1)    | DCE            | 8  |
| 21              | AgSPh (0.1)                | DCE            | <2 |
| 22              | AgCl (0.1)                 | DCE            | <2 |
| 23 <sup>e</sup> | AgOAc (1.2)                | DCE            | 11 |
| 24 <sup>f</sup> | AgOAc (1.2)                | DCE            | 15 |

<sup>a</sup> Conditions: **1a** (0.2 mmol), **2a** (2 equiv, 0.4 mmol), solvent (0.6 mL), reacted for 24 h at 125°C under argon atmosphere unless otherwise noted. <sup>b</sup> Isolated yields. <sup>c</sup> 1.5 equiv. of disulfide (**2a**) was used. <sup>d</sup> Reacted at 110 °C. <sup>e</sup> O<sub>2</sub> atmosphere. <sup>f</sup> Air atmosphere.

#### 4. Radical trapping experiments

While TEMPO (2,2,6,6-tetramethylpiperidine-1-oxyl, 1.2 equiv) as radical inhibitor was subjected to the standard procedure, arylsulfide radical (ArS•) was trapped by the TEMPO to afford 4-arythiooxy-2,2,6,6-tetramethylpiperidine **9a**, **9d** and **9e** determined by the GC-MS. The attempted isolation of these products was failed.

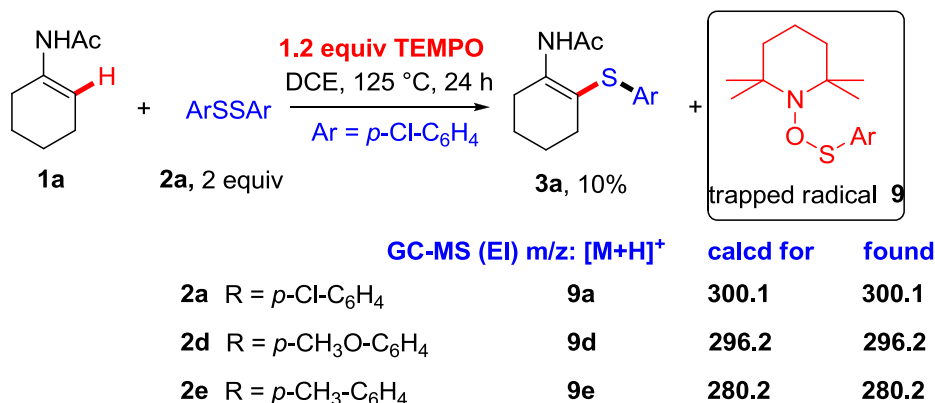

The GC-MS (EI) of **9a**, **9b** and **9** were copied c as follow:

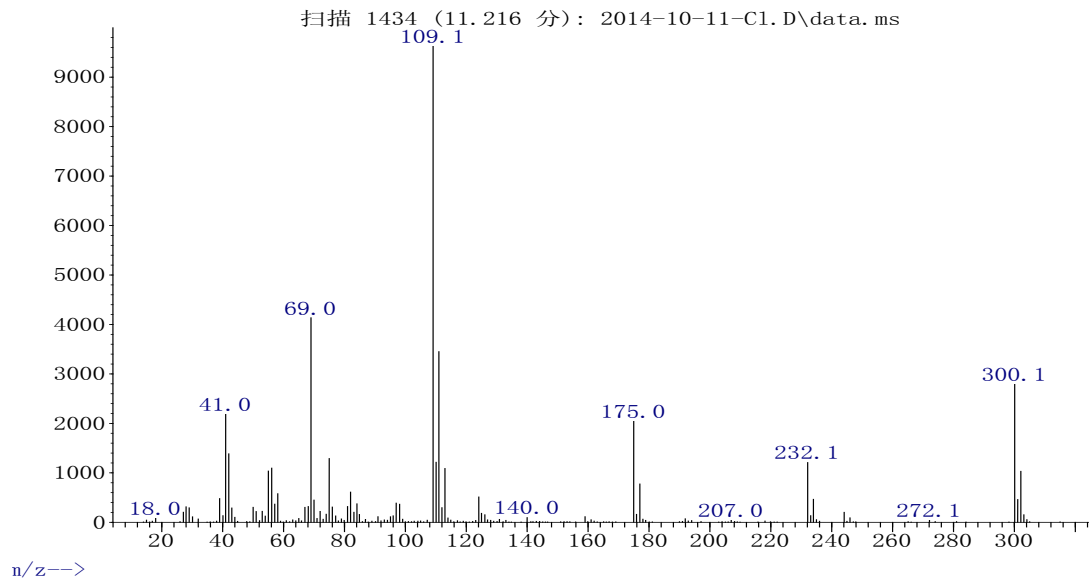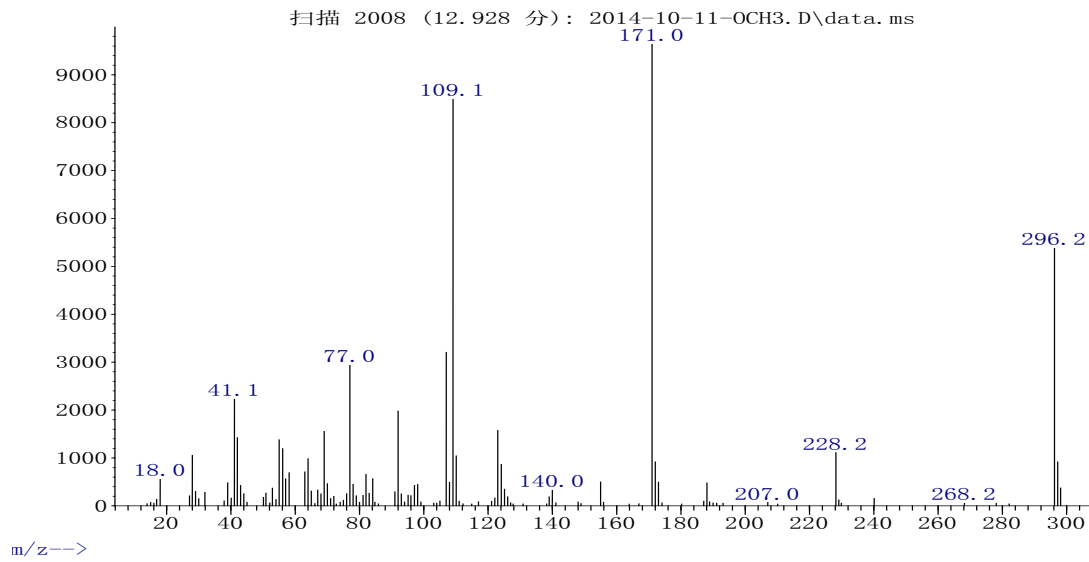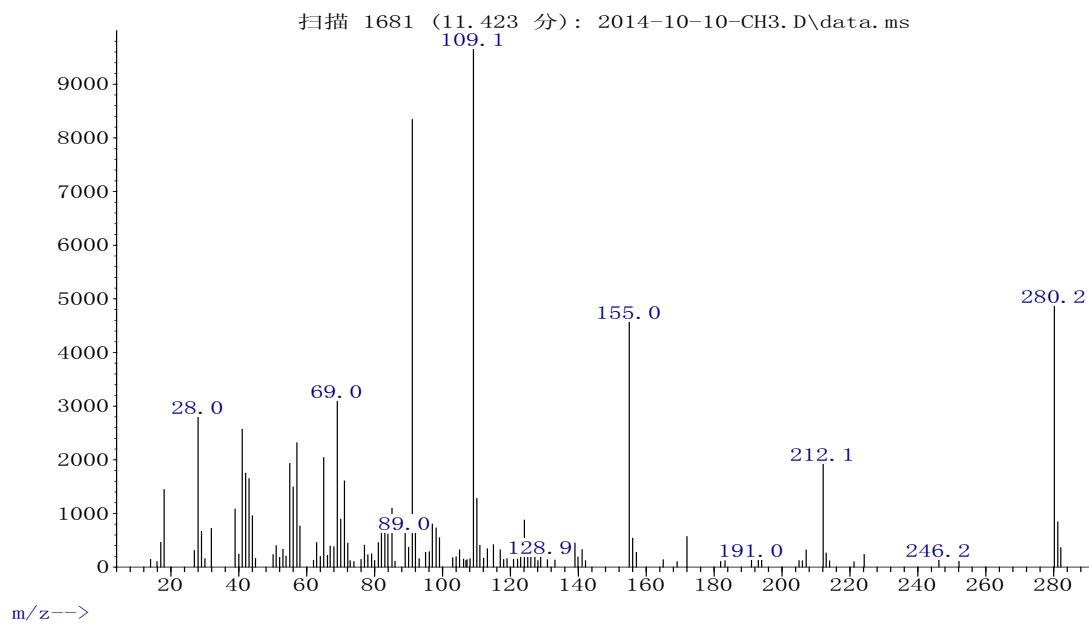

## 5. The determination of the stereochemistry of product **4i**

The *E* configuration of product **4i** was determined by NOE of the adjacent protons on the two methyl groups.

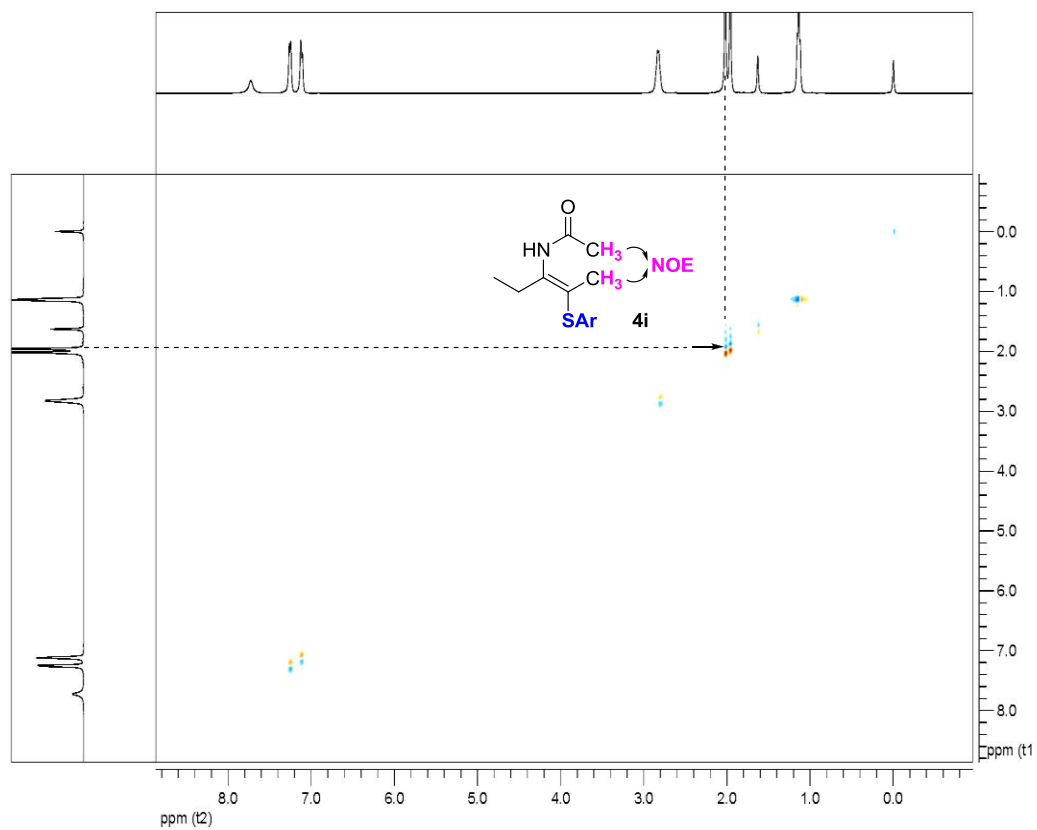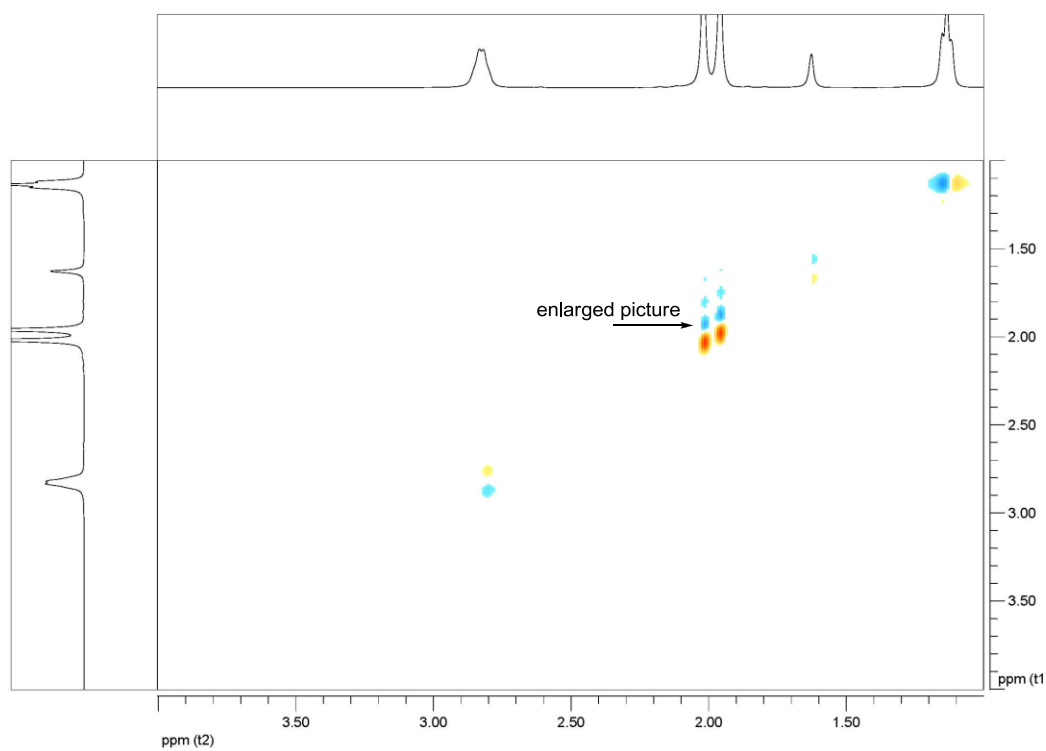

## 6. Characterization data of products 3a-3h, 4b-4i, 5a-5e.

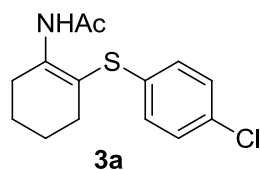

**3a:** White solid (46.2 mg, 82 % yield); m. p. 130-132°C;  $^1\text{H}$  NMR (400 MHz,  $\text{CDCl}_3$ , TMS)  $\delta$  7.95 (s, 1H), 7.26 (d,  $J = 6.8$  Hz, 2H), 7.11 (d,  $J = 7.6$  Hz, 2H), 2.89 (s, 2H), 2.22 (s, 2H), 2.01 (s, 3H), 1.73-1.66 (m, 4H);  $^{13}\text{C}$  NMR (100 MHz,  $\text{CDCl}_3$ )  $\delta$  168.21, 142.67, 133.22, 131.86, 129.22, 129.01, 109.78, 30.64, 28.54, 24.56, 23.30, 22.42; MS (EI)  $m/z$  (%): 283 (1), 281 (3), 240 (1), 238 (4), 138 (100), 96 (25), 67 (8); IR: 3228  $\text{cm}^{-1}$ , 1661  $\text{cm}^{-1}$ , 1523  $\text{cm}^{-1}$ , 1359  $\text{cm}^{-1}$ ; HRMS (ESI)  $m/z$ :  $[\text{M}+\text{H}]^+$  calcd for  $\text{C}_{14}\text{H}_{17}\text{ClNOS}$ , 282.0714, found: 282.0708.

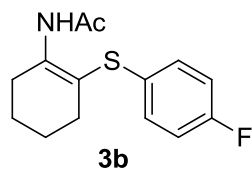

**3b:** White solid (21.7 mg, 41 % yield); m. p. 101-103°C;  $^1\text{H}$  NMR (400 MHz,  $\text{CDCl}_3$ , TMS)  $\delta$  7.98 (s, 1H), 7.18 (t,  $J = 7.2$  Hz, 2H), 7.00 (t,  $J = 7.6$  Hz, 2H), 2.87 (s, 2H), 2.20 (s, 2H), 2.03 (s, 3H), 1.71 (d,  $J = 5.6$  Hz, 2H), 1.65 (d,  $J = 6.8$  Hz, 2H);  $^{13}\text{C}$  NMR (100 MHz,  $\text{CDCl}_3$ )  $\delta$  168.32 (s), 163.09 (s), 160.64 (s), 141.80 (s), 130.44 (d,  $J = 30.4$  Hz), 116.41 (d,  $J = 88.4$  Hz), 109.53 (s), 30.75 (s), 28.68 (s), 24.68 (s), 23.49 (s), 22.64 (s); MS (EI)  $m/z$  (%): 265 (3)  $[\text{M}]^+$ , 222 (5), 190 (8), 162 (7), 138 (100), 96 (32), 67 (9); IR: 3245  $\text{cm}^{-1}$ , 1663  $\text{cm}^{-1}$ , 1531  $\text{cm}^{-1}$ , 1366  $\text{cm}^{-1}$ ; HRMS (ESI)  $m/z$ :  $[\text{M}+\text{H}]^+$  calcd for  $\text{C}_{14}\text{H}_{17}\text{FNOS}$ , 266.1009, found: 266.1005.

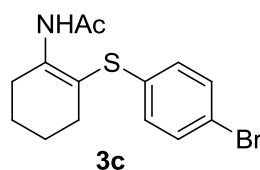

**3c:** White solid (23.5 mg, 36 % yield); m. p. 143-145°C;  $^1\text{H}$  NMR (400 MHz,  $\text{CDCl}_3$ , TMS)  $\delta$  7.96 (s, 1H), 7.40 (d,  $J = 8.8$  Hz, 2H), 7.05 (d,  $J = 7.6$  Hz, 2H), 2.90 (s, 2H), 2.23 (s, 2H), 2.02 (s, 3H), 1.73 (d,  $J = 6.0$  Hz, 2H), 1.70-1.64 (m, 2H);  $^{13}\text{C}$  NMR (100 MHz,  $\text{CDCl}_3$ )  $\delta$  168.31, 143.21, 134.05, 132.31, 129.26, 119.83, 109.18, 30.82, 28.63, 24.81, 23.44, 22.55; MS (EI)  $m/z$  (%): 327 (1), 325 (1), 284 (1), 282 (1), 138 (100), 96 (23), 67 (7); IR: 3230  $\text{cm}^{-1}$ , 1660  $\text{cm}^{-1}$ , 1522  $\text{cm}^{-1}$ , 1363  $\text{cm}^{-1}$ ; HRMS (ESI)  $m/z$ :  $[\text{M}+\text{H}]^+$  calcd for  $\text{C}_{14}\text{H}_{17}\text{BrNOS}$ , 326.0209, found: 326.0204.

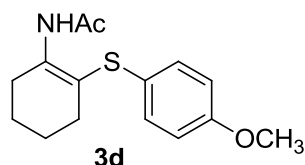

**3d:** White solid (39.3 mg, 71 % yield); m. p. 127-129°C;  $^1\text{H}$  NMR (400 MHz,  $\text{CDCl}_3$ , TMS)  $\delta$  7.99 (s, 1H), 7.18 (d,  $J = 8.8$  Hz, 2H), 6.85 (d,  $J = 8.0$  Hz, 2H), 3.79 (s, 3H), 2.84 (s, 2H), 2.17 (s, 2H), 2.04 (s, 3H), 1.69 (d,  $J = 4.8$  Hz, 2H), 1.61 (s, 2H);  $^{13}\text{C}$  NMR (100 MHz,  $\text{CDCl}_3$ )  $\delta$  168.26, 158.83, 139.97, 131.17, 124.64, 114.83, 112.42, 55.40, 30.33, 28.47, 24.63, 23.40, 22.56; MS (EI)  $m/z$  (%): 277 (3)  $[\text{M}]^+$ , 234 (2), 202 (4), 138 (100), 96 (31); IR: 3239  $\text{cm}^{-1}$ , 1656  $\text{cm}^{-1}$ , 1526  $\text{cm}^{-1}$ , 1367  $\text{cm}^{-1}$ ; HRMS (ESI)  $m/z$ :  $[\text{M}+\text{H}]^+$  calcd for  $\text{C}_{15}\text{H}_{20}\text{NO}_2\text{S}$ , 278.1209, found: 278.1204.

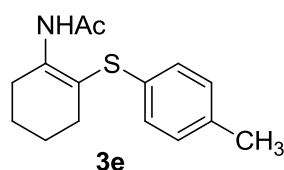

**3e:** White solid (33.4 mg, 64 % yield); m. p. 127-129°C;  $^1\text{H}$  NMR (400 MHz,  $\text{CDCl}_3$ , TMS)  $\delta$  8.03 (s, 1H), 7.10 (s, 4H), 2.88 (s, 2H), 2.32 (s, 3H), 2.22 (s, 2H), 2.01 (s, 3H), 1.71 (d,  $J = 5.6$  Hz, 2H), 1.65 (d,  $J = 4.8$  Hz, 2H);  $^{13}\text{C}$  NMR (100 MHz,  $\text{CDCl}_3$ )  $\delta$  168.31, 141.76, 136.24, 130.95, 130.04, 128.41, 110.50, 30.71, 28.52, 24.78, 23.45, 22.63, 21.08; MS (EI)  $m/z$  (%): 261 (4)  $[\text{M}]^+$ , 218 (4), 186 (6), 138 (100), 96 (41), 67 (8); IR: 3236  $\text{cm}^{-1}$ , 1654  $\text{cm}^{-1}$ , 1525  $\text{cm}^{-1}$ , 1362  $\text{cm}^{-1}$ ; HRMS (ESI)  $m/z$ :  $[\text{M}+\text{H}]^+$  calcd for  $\text{C}_{15}\text{H}_{20}\text{NOS}$ , 262.1260, found: 262.1257.

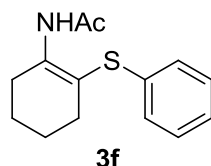

**3f:** White solid (22.7 mg, 46 % yield); m. p. 94-96°C;  $^1\text{H}$  NMR (400 MHz,  $\text{CDCl}_3$ , TMS)  $\delta$  8.04 (s, 1H), 7.29 (t,  $J = 7.2$  Hz, 2H), 7.19 (d,  $J = 7.2$  Hz, 3H), 2.91 (s, 2H), 2.26 (s, 2H), 2.01 (s, 3H), 1.75-1.71 (m, 2H), 1.67 (d,  $J = 4.8$  Hz, 2H);  $^{13}\text{C}$  NMR (100 MHz,  $\text{CDCl}_3$ )  $\delta$  168.29, 142.58, 134.74, 129.24, 127.72, 126.04, 109.65, 30.83, 28.52, 24.73, 23.42, 22.57; MS (EI)  $m/z$  (%): 247 (3)  $[\text{M}]^+$ , 204 (6), 172 (8), 138 (100), 96 (47), 67 (12); IR: 3231  $\text{cm}^{-1}$ , 1654  $\text{cm}^{-1}$ , 1522  $\text{cm}^{-1}$ , 1364  $\text{cm}^{-1}$ ; HRMS (ESI)  $m/z$ :  $[\text{M}+\text{H}]^+$  calcd for  $\text{C}_{14}\text{H}_{18}\text{NOS}$ , 248.1104, found: 248.1101.

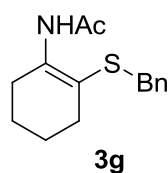

**3g:** Light yellow liquid (9.4 mg, 18 % yield);  $^1\text{H}$  NMR (400 MHz,  $\text{CDCl}_3$ , TMS)  $\delta$  7.63 (s, 1H), 7.30 (t,  $J = 6.4$  Hz, 2H), 7.22 (t,  $J = 7.2$  Hz, 3H), 3.71 (s, 2H), 2.68 (s, 2H), 2.30 (s, 2H), 1.78 (s,

3H), 1.63 (s, 4H);  $^{13}\text{C}$  NMR (100 MHz,  $\text{CDCl}_3$ )  $\delta$  168.47, 157.74, 151.80, 136.75, 129.44, 120.78, 109.06, 30.64, 28.57, 24.48, 24.41, 23.34, 22.52; MS (EI)  $m/z$  (%): 261 (6)  $[\text{M}]^+$ , 218 (2), 170 (32), 138 (37), 128 (100), 91 (33); IR:  $2932\text{ cm}^{-1}$ ,  $1669\text{ cm}^{-1}$ ,  $1493\text{ cm}^{-1}$ ,  $1368\text{ cm}^{-1}$ ; HRMS (ESI)  $m/z$ :  $[\text{M}+\text{H}]^+$  calcd for  $\text{C}_{15}\text{H}_{20}\text{NOS}$ , 262.1260, found: 262.1257.

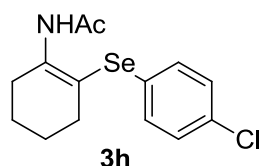

**3h**: White solid (18.4 mg, 28 % yield); m. p.  $132\text{-}134^\circ\text{C}$ ;  $^1\text{H}$  NMR (400 MHz,  $\text{CDCl}_3$ , TMS)  $\delta$  7.70 (s, 1H), 7.28-7.23 (m, 4H), 2.84 (s, 2H), 2.33 (s, 2H), 1.99 (s, 3H), 1.73 (d,  $J = 5.2\text{ Hz}$ , 2H), 1.65 (d,  $J = 4.8\text{ Hz}$ , 2H);  $^{13}\text{C}$  NMR (100 MHz,  $\text{CDCl}_3$ )  $\delta$  168.38, 140.90, 133.12, 132.17, 129.64, 128.22, 110.02, 33.03, 28.89, 24.59, 24.08, 22.70; MS (EI)  $m/z$  (%): 331 (1), 329 (2), 327 (1), 288 (1), 286 (2), 284 (1), 138 (100), 96 (45); IR:  $3235\text{ cm}^{-1}$ ,  $1657\text{ cm}^{-1}$ ,  $1521\text{ cm}^{-1}$ ,  $1362\text{ cm}^{-1}$ ; HRMS (ESI)  $m/z$ :  $[\text{M}+\text{H}]^+$  calcd for  $\text{C}_{14}\text{H}_{17}\text{ClNOSe}$ , 330.0158, found: 330.0152.

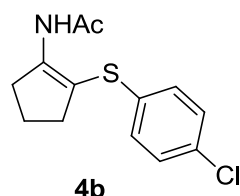

**4b**: White solid (32.6 mg, 61 % yield); m. p.  $131\text{-}132^\circ\text{C}$ ;  $^1\text{H}$  NMR (400 MHz,  $\text{CDCl}_3$ , TMS)  $\delta$  7.62 (s, 1H), 7.25 (d,  $J = 8.4\text{ Hz}$ , 2H), 7.10 (d,  $J = 6.8\text{ Hz}$ , 2H), 3.15 (t,  $J = 6.8\text{ Hz}$ , 2H), 2.39 (t,  $J = 7.6\text{ Hz}$ , 2H), 2.08 (s, 3H), 2.02-1.95 (m, 2H);  $^{13}\text{C}$  NMR (100 MHz,  $\text{CDCl}_3$ )  $\delta$  167.69, 146.35, 133.54, 132.02, 129.34, 128.84, 106.87, 33.18, 33.10, 24.34, 21.47; MS (EI)  $m/z$  (%): 269 (18), 267 (53), 227 (12), 225 (32), 194 (10), 192 (28), 124 (100), 82 (97); IR:  $3277\text{ cm}^{-1}$ ,  $1671\text{ cm}^{-1}$ ,  $1625\text{ cm}^{-1}$ ,  $1490\text{ cm}^{-1}$ ,  $1338\text{ cm}^{-1}$ ; HRMS (ESI)  $m/z$ :  $[\text{M}+\text{H}]^+$  calcd for  $\text{C}_{13}\text{H}_{15}\text{ClNOS}$ , 268.0557, found: 268.0551.

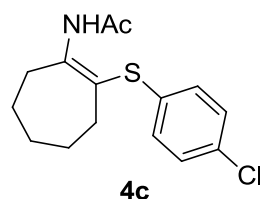

**4c**: White solid (36.0 mg, 61 % yield); m. p.  $115\text{-}117^\circ\text{C}$ ;  $^1\text{H}$  NMR (400 MHz,  $\text{CDCl}_3$ , TMS)  $\delta$  7.55 (s, 1H), 7.25 (d,  $J = 8.4\text{ Hz}$ , 2H), 7.14 (d,  $J = 8.4\text{ Hz}$ , 2H), 2.85 (t,  $J = 5.2\text{ Hz}$ , 2H), 2.41 (t,  $J = 4.8\text{ Hz}$ , 2H), 2.02 (s, 3H), 1.75 (d,  $J = 4.4\text{ Hz}$ , 2H), 1.71 (t,  $J = 4.8\text{ Hz}$ , 2H), 1.51 (d,  $J = 5.2\text{ Hz}$ , 2H);  $^{13}\text{C}$  NMR (100 MHz,  $\text{CDCl}_3$ )  $\delta$  168.82, 146.95, 133.55, 132.31, 129.93, 129.32, 117.93, 35.26, 31.79, 31.45, 26.81, 25.39, 24.29; MS (EI)  $m/z$  (%): 297 (1), 295 (2), 254 (1), 252 (2), 152 (100), 110 (10); IR:  $3238\text{ cm}^{-1}$ ,  $1662\text{ cm}^{-1}$ ,  $1525\text{ cm}^{-1}$ ,  $1363\text{ cm}^{-1}$ ; HRMS (ESI)  $m/z$ :  $[\text{M}+\text{H}]^+$  calcd for  $\text{C}_{15}\text{H}_{19}\text{ClNOS}$ , 296.0870, found: 296.0872.



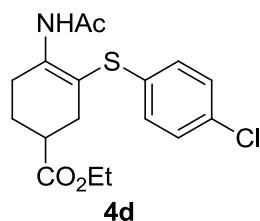

**4d:** yellow liquid (35.3 mg, 50 % yield);  $^1\text{H NMR}$  (400 MHz,  $\text{CDCl}_3$ , TMS)  $\delta$  8.02 (s, 1H), 7.27 (d,  $J = 8.0$  Hz, 2H), 7.14 (d,  $J = 8.0$  Hz, 2H), 4.13 (t,  $J = 2.4$  Hz, 2H), 3.07 (d,  $J = 18.4$  Hz, 1H), 2.94 (d,  $J = 18.0$  Hz, 1H), 2.64 (d,  $J = 8.8$  Hz, 1H), 2.53 (t,  $J = 8.8$  Hz, 1H), 2.44 (t,  $J = 4.4$  Hz, 1H), 2.11 (d,  $J = 13.6$  Hz, 1H), 2.03 (s, 3H), 1.87-1.77 (m, 1H), 1.24 (t,  $J = 7.6$  Hz, 3H);  $^{13}\text{C NMR}$  (100 MHz,  $\text{CDCl}_3$ )  $\delta$  174.33, 168.35, 142.47, 132.82, 132.47, 129.53, 129.32, 107.64, 60.74, 39.84, 32.62, 27.44, 25.04, 24.71, 14.30; MS (EI)  $m/z$  (%): 355 (1), 353 (3), 312 (1), 310 (3), 268 (1), 266 (4), 240 (2), 238 (6), 210 (100), 168 (26); IR:  $3273\text{ cm}^{-1}$ ,  $1725\text{ cm}^{-1}$ ,  $1629\text{ cm}^{-1}$ ,  $1473\text{ cm}^{-1}$ ,  $1367\text{ cm}^{-1}$ ; HRMS (ESI)  $m/z$ :  $[\text{M}+\text{Na}]^+$  calcd for  $\text{C}_{17}\text{H}_{20}\text{ClNNaO}_3\text{S}$ , 376.0745, found: 376.0741.

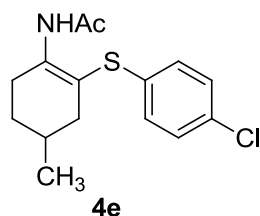

**4e:** White solid (44.9 mg, 76 % yield); m. p.  $100\text{--}102^\circ\text{C}$ ;  $^1\text{H NMR}$  (400 MHz,  $\text{CDCl}_3$ , TMS)  $\delta$  7.97 (s, 1H), 7.26 (d,  $J = 8.0$  Hz, 2H), 7.11 (d,  $J = 8.4$  Hz, 2H), 3.03 (d,  $J = 13.2$  Hz, 1H), 2.85 (d,  $J = 6.8$  Hz, 1H), 2.24 (d,  $J = 16.4$  Hz, 1H), 2.02 (s, 3H), 1.91 (t,  $J = 10.0$  Hz, 1H), 1.82 (d,  $J = 11.6$  Hz, 1H), 1.78 (d,  $J = 11.6$  Hz, 2H), 1.37-1.27 (m, 1H), 0.94 (d,  $J = 7.2$  Hz, 3H);  $^{13}\text{C NMR}$  (100 MHz,  $\text{CDCl}_3$ )  $\delta$  168.24, 142.66, 133.38, 132.15, 129.41, 129.18, 108.84, 39.06, 30.60, 29.49, 28.33, 24.68, 21.13; MS (EI)  $m/z$  (%): 297 (1), 295 (2), 254 (1), 252 (3), 152 (100), 110 (30); IR:  $3260\text{ cm}^{-1}$ ,  $1659\text{ cm}^{-1}$ ,  $1515\text{ cm}^{-1}$ ,  $1368\text{ cm}^{-1}$ ; HRMS (ESI)  $m/z$ :  $[\text{M}+\text{H}]^+$  calcd for  $\text{C}_{15}\text{H}_{19}\text{ClNOS}$ , 296.0870, found: 296.0871.

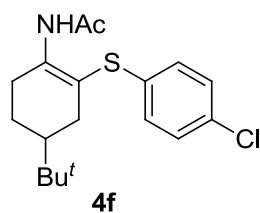

**4f:** White solid (40.5 mg, 60 % yield); m. p.  $112\text{--}115^\circ\text{C}$ ;  $^1\text{H NMR}$  (400 MHz,  $\text{CDCl}_3$ , TMS)  $\delta$  7.97 (s, 1H), 7.26 (d,  $J = 8.0$  Hz, 2H), 7.09 (d,  $J = 8.0$  Hz, 2H), 3.11 (d,  $J = 18.0$  Hz, 1H), 2.78 (t,  $J = 13.6$  Hz, 1H), 2.20 (d,  $J = 14.4$  Hz, 1H), 2.08 (t,  $J = 13.2$  Hz, 1H), 2.01 (s, 3H), 1.94 (d,  $J = 9.2$  Hz, 1H), 1.42-1.38 (m, 1H), 1.36-1.20 (m, 1H), 0.84 (s, 9H);  $^{13}\text{C NMR}$  (100 MHz,  $\text{CDCl}_3$ )  $\delta$  168.25, 143.36, 133.57, 132.00, 129.46, 128.68, 109.24, 45.19, 32.70, 29.66, 27.23, 24.68, 24.02; MS (EI)  $m/z$  (%): 339 (1), 337 (2), 296 (1), 294 (2), 194 (100), 152 (5), 96 (11); IR:  $3255\text{ cm}^{-1}$ ,  $1664\text{ cm}^{-1}$ ,  $1521\text{ cm}^{-1}$ ,  $1368\text{ cm}^{-1}$ ; HRMS (ESI)  $m/z$ :  $[\text{M}+\text{H}]^+$  calcd for  $\text{C}_{18}\text{H}_{25}\text{ClNOS}$ , 338.1340, found: 338.1338.

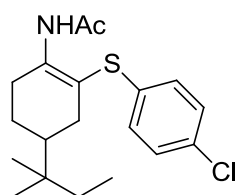

**4g**

**4g:** White solid (52.0 mg, 74 % yield); m. p. 91-94°C;  $^1\text{H NMR}$  (400 MHz,  $\text{CDCl}_3$ , TMS)  $\delta$  7.96 (s, 1H), 7.26 (d,  $J = 6.4$  Hz, 2H), 7.09 (d,  $J = 7.6$  Hz, 2H), 3.10 (d,  $J = 17.6$  Hz, 1H), 2.78 (t,  $J = 11.2$  Hz, 1H), 2.16-2.05 (m, 1H), 2.01 (s, 3H), 1.90 (d,  $J = 9.6$  Hz, 1H), 1.52-1.45 (m, 1H), 1.31-1.20 (m, 4H), 0.77 (d,  $J = 16.4$  Hz, 9H);  $^{13}\text{C NMR}$  (100 MHz,  $\text{CDCl}_3$ )  $\delta$  168.28, 143.48, 133.55, 131.88, 129.44, 128.51, 109.05, 42.46, 34.65, 32.50, 32.19, 29.68, 24.78, 23.95, 23.77, 23.57, 8.16; MS (EI)  $m/z$  (%): 353 (1), 351 (2), 310 (1), 308 (2), 208 (100), 166 (4), 96 (13); IR:  $3236\text{ cm}^{-1}$ ,  $1664\text{ cm}^{-1}$ ,  $1525\text{ cm}^{-1}$ ,  $1367\text{ cm}^{-1}$ ; HRMS (ESI)  $m/z$ :  $[\text{M}+\text{H}]^+$  calcd for  $\text{C}_{19}\text{H}_{27}\text{ClNOS}$ , 352.1496, found: 352.1495.

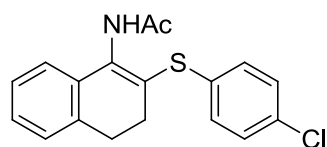

**4h**

**4h:** White solid (15.8 mg, 24 % yield; 36.9 mg, 56 % yield); m. p. 204-205°C;  $^1\text{H NMR}$  (400 MHz,  $\text{CDCl}_3$ , TMS)  $\delta$  7.34-7.12 (m, 8H), 6.90 (s, 1H), 2.82 (s, 2H), 2.43 (s, 2H), 2.22 (s, 2H), 1.92 (s, 1H);  $^{13}\text{C NMR}$  (100 MHz,  $\text{CDCl}_3$ )  $\delta$  157.95, 135.39, 134.50, 132.79, 132.77, 129.52, 128.06, 127.68, 126.78, 126.74, 123.18, 123.11, 28.96, 28.77, 23.36; MS (EI)  $m/z$  (%): 331 (1), 329 (2), 288 (1), 286 (2), 186 (100), 144 (25), 115 (42); IR:  $3235\text{ cm}^{-1}$ ,  $1651\text{ cm}^{-1}$ ,  $1521\text{ cm}^{-1}$ ,  $1369\text{ cm}^{-1}$ ; HRMS (ESI)  $m/z$ :  $[\text{M}+\text{H}]^+$  calcd for  $\text{C}_{18}\text{H}_{17}\text{ClNOS}$ , 330.0714, found: 330.0711.

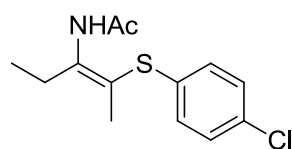

**4i**

**4i:** White solid (23.7 mg, 44 % yield); m. p. 103-105°C;  $^1\text{H NMR}$  (400 MHz,  $\text{CDCl}_3$ , TMS)  $\delta$  7.74 (s, 1H), 7.27 (d,  $J = 6.4$  Hz, 2H), 7.13 (d,  $J = 7.6$  Hz, 2H), 2.84 (d,  $J = 6.8$  Hz, 2H), 2.04 (s, 3H), 1.98 (s, 3H), 1.15 (t,  $J = 6.8$  Hz, 3H);  $^{13}\text{C NMR}$  (100 MHz,  $\text{CDCl}_3$ )  $\delta$  168.17, 145.30, 133.34, 132.39, 129.70, 129.44, 109.36, 24.51, 22.89, 18.85, 12.74; MS (EI)  $m/z$  (%): 271 (1), 269 (2), 228 (1), 226 (3), 126 (100), 108 (10), 84 (49); IR:  $3249\text{ cm}^{-1}$ ,  $1661\text{ cm}^{-1}$ ,  $1517\text{ cm}^{-1}$ ,  $1363\text{ cm}^{-1}$ ; HRMS (ESI)  $m/z$ :  $[\text{M}+\text{H}]^+$  calcd for  $\text{C}_{13}\text{H}_{17}\text{ClNOS}$ , 270.0714, found: 270.0713.

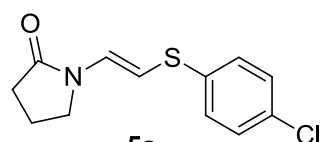

**5a**

**5a:** Light yellow liquid (41.1 mg, 81 % yield);  $^1\text{H NMR}$  (400 MHz,  $\text{CDCl}_3$ , TMS)  $\delta$  7.44 (d,  $J = 14.4$  Hz, 1H), 7.24 (t,  $J = 4.8$  Hz, 4H), 5.57 (d,  $J = 13.6$  Hz, 1H), 3.61 (t,  $J = 6.8$  Hz, 2H), 2.53 (t,  $J = 8.0$  Hz, 2H), 2.20-2.15 (m, 2H);  $^{13}\text{C NMR}$  (100 MHz,  $\text{CDCl}_3$ )  $\delta$  173.04, 136.18, 132.32, 132.01, 129.12, 129.01, 100.99, 45.33, 30.91, 17.61; MS (EI)  $m/z$  (%): 255 (4), 253 (13), 170 (2), 168 (7), 145 (3), 143 (8), 110 (100); IR:  $3041\text{ cm}^{-1}$ ,  $1694\text{ cm}^{-1}$ ,  $1473\text{ cm}^{-1}$ ,  $1393\text{ cm}^{-1}$ ; HRMS (ESI)  $m/z$ :  $[\text{M}+\text{H}]^+$  calcd for  $\text{C}_{12}\text{H}_{13}\text{ClNOS}$ , 254.0401, found: 254.0401.

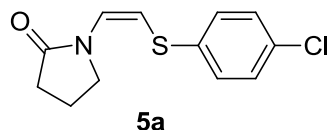

**5a:** Light yellow liquid (3.5 mg, 7 % yield);  $^1\text{H NMR}$  (400 MHz,  $\text{CDCl}_3$ , TMS)  $\delta$  7.29-7.23 (m, 4H), 7.08 (d,  $J = 8.4$  Hz, 1H), 5.46 (d,  $J = 8.8$  Hz, 1H), 4.04 (t,  $J = 6.4$  Hz, 2H), 2.44 (t,  $J = 8.0$  Hz, 2H), 2.14-2.06 (m, 2H); MS (EI)  $m/z$  (%): 255 (3), 253 (9), 170 (2), 168 (5), 145 (2), 143 (6), 110 (100); IR:  $3050\text{ cm}^{-1}$ ,  $1696\text{ cm}^{-1}$ ,  $1606\text{ cm}^{-1}$ ,  $1473\text{ cm}^{-1}$ ,  $1384\text{ cm}^{-1}$ ; HRMS (ESI)  $m/z$ :  $[\text{M}+\text{H}]^+$  calcd for  $\text{C}_{12}\text{H}_{13}\text{ClNOS}$ , 254.0401, found: 254.0401.

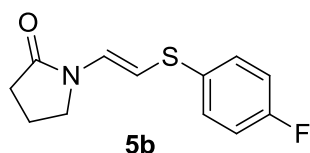

**5b:** Light yellow liquid (29.4 mg, 62 % yield);  $^1\text{H NMR}$  (400 MHz,  $\text{CDCl}_3$ , TMS)  $\delta$  7.41 (d,  $J = 14.4$  Hz, 1H), 7.31-7.27 (m, 2H), 6.99 (t,  $J = 8.4$  Hz, 2H), 5.59 (d,  $J = 14.4$  Hz, 1H), 3.58 (t,  $J = 7.6$  Hz, 2H), 2.52 (t,  $J = 8.0$  Hz, 2H), 2.19-2.12 (m, 2H);  $^{13}\text{C NMR}$  (100 MHz,  $\text{CDCl}_3$ )  $\delta$  173.06(s), 163.04(s), 131.29(s), 130.33 (d,  $J = 30.8$  Hz), 116.15 (d,  $J = 87.6$  Hz), 110.12(s), 102.42(s), 45.34(s), 30.96(s), 17.60(s); MS (EI)  $m/z$  (%): 237 (20)  $[\text{M}]^+$ , 152 (18), 139 (5), 127 (22), 110 (100); IR:  $3053\text{ cm}^{-1}$ ,  $1697\text{ cm}^{-1}$ ,  $1607\text{ cm}^{-1}$ ,  $1486\text{ cm}^{-1}$ ,  $1385\text{ cm}^{-1}$ ; HRMS (ESI)  $m/z$ :  $[\text{M}+\text{H}]^+$  calcd for  $\text{C}_{12}\text{H}_{13}\text{FNOS}$ , 238.0696, found: 238.0696.

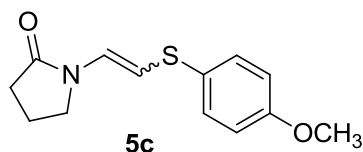

**5c:** Light yellow liquid (40.8 mg, 82 % yield);  $^1\text{H NMR}$  (400 MHz,  $\text{CDCl}_3$ , TMS)  $\delta$  7.31 (t,  $J = 8.8$  Hz, 3H), 6.84 (d,  $J = 8.4$  Hz, 2H), 5.60 (d,  $J = 14.0$  Hz, 1H), 3.79 (s, 3H), 3.55 (t,  $J = 6.4$  Hz, 2H), 2.50 (t,  $J = 8.4$  Hz, 2H), 2.16-2.09 (m, 2H);  $^{13}\text{C NMR}$  (100 MHz,  $\text{CDCl}_3$ )  $\delta$  172.86, 159.03, 131.32, 129.38, 114.86, 114.80, 104.48, 55.49, 45.36, 30.99, 17.58; MS (EI)  $m/z$  (%): 249 (18)  $[\text{M}]^+$ , 164 (7), 151 (4), 139 (5), 121 (12), 110 (100); IR:  $2939\text{ cm}^{-1}$ ,  $1693\text{ cm}^{-1}$ ,  $1607\text{ cm}^{-1}$ ,  $1491\text{ cm}^{-1}$ ,  $1386\text{ cm}^{-1}$ ; HRMS (ESI)  $m/z$ :  $[\text{M}+\text{H}]^+$  calcd for  $\text{C}_{13}\text{H}_{16}\text{NO}_2\text{S}$ , 250.0896, found: 250.0895.

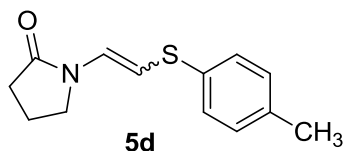

**5d:** Light yellow liquid (31.7 mg, 68 % yield);  $^1\text{H}$  NMR (400 MHz,  $\text{CDCl}_3$ , TMS)  $\delta$  7.38 (d,  $J = 14.0$  Hz, 1H), 7.29-7.20 (m, 2H), 7.15-7.09 (m, 2H), 5.61 (d,  $J = 13.6$  Hz, 1H), 3.60 (t,  $J = 9.6$  Hz, 2H), 2.51 (t,  $J = 8.0$  Hz, 2H), 2.31 (s, 3H), 2.18-2.05 (m, 2H);  $^{13}\text{C}$  NMR (100 MHz,  $\text{CDCl}_3$ )  $\delta$  172.95, 136.31, 133.44, 130.52, 129.86, 128.60, 103.03, 45.36, 31.00, 21.08, 17.61; MS (EI)  $m/z$  (%): 233 (16)  $[\text{M}]^+$ , 148 (8), 135 (4), 123 (5), 110 (100); IR:  $3051\text{ cm}^{-1}$ ,  $1697\text{ cm}^{-1}$ ,  $1607\text{ cm}^{-1}$ ,  $1490\text{ cm}^{-1}$ ,  $1385\text{ cm}^{-1}$ ; HRMS (ESI)  $m/z$ :  $[\text{M}+\text{H}]^+$  calcd for  $\text{C}_{13}\text{H}_{16}\text{NOS}$ , 234.0947, found: 234.0944.

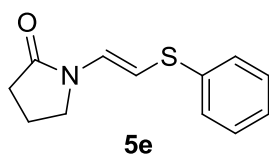

**5e:** Light yellow liquid (24.1 mg, 55 % yield);  $^1\text{H}$  NMR (400 MHz,  $\text{CDCl}_3$ , TMS)  $\delta$  7.43 (d,  $J = 14.0$  Hz, 1H), 7.28 (t,  $J = 6.0$  Hz, 4H), 7.17 (t,  $J = 6.8$  Hz, 1H), 5.62 (d,  $J = 14.4$  Hz, 1H), 3.60 (t,  $J = 7.6$  Hz, 2H), 2.52 (t,  $J = 8.0$  Hz, 2H), 2.19-2.12 (m, 2H);  $^{13}\text{C}$  NMR (100 MHz,  $\text{CDCl}_3$ )  $\delta$  172.78, 137.42, 131.49, 129.06, 127.87, 126.11, 101.90, 45.37, 30.99, 17.63; MS (EI)  $m/z$  (%): 219 (16)  $[\text{M}]^+$ , 134 (8), 121 (3), 110 (100); IR:  $3052\text{ cm}^{-1}$ ,  $1697\text{ cm}^{-1}$ ,  $1607\text{ cm}^{-1}$ ,  $1582\text{ cm}^{-1}$ ,  $1385\text{ cm}^{-1}$ ; HRMS (ESI)  $m/z$ :  $[\text{M}+\text{H}]^+$  calcd for  $\text{C}_{12}\text{H}_{14}\text{NOS}$ , 220.0791, found: 220.0791.

7. Copies of  $^1\text{H}$  and  $^{13}\text{C}$  NMR spectra of 3a-3h, 4b-4i, 5a-5e.

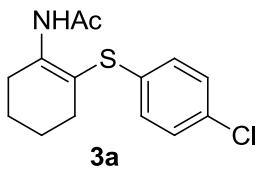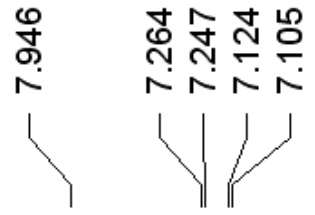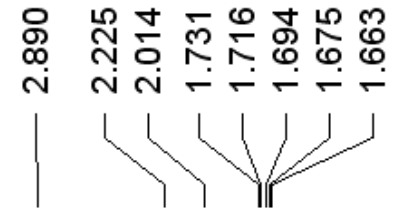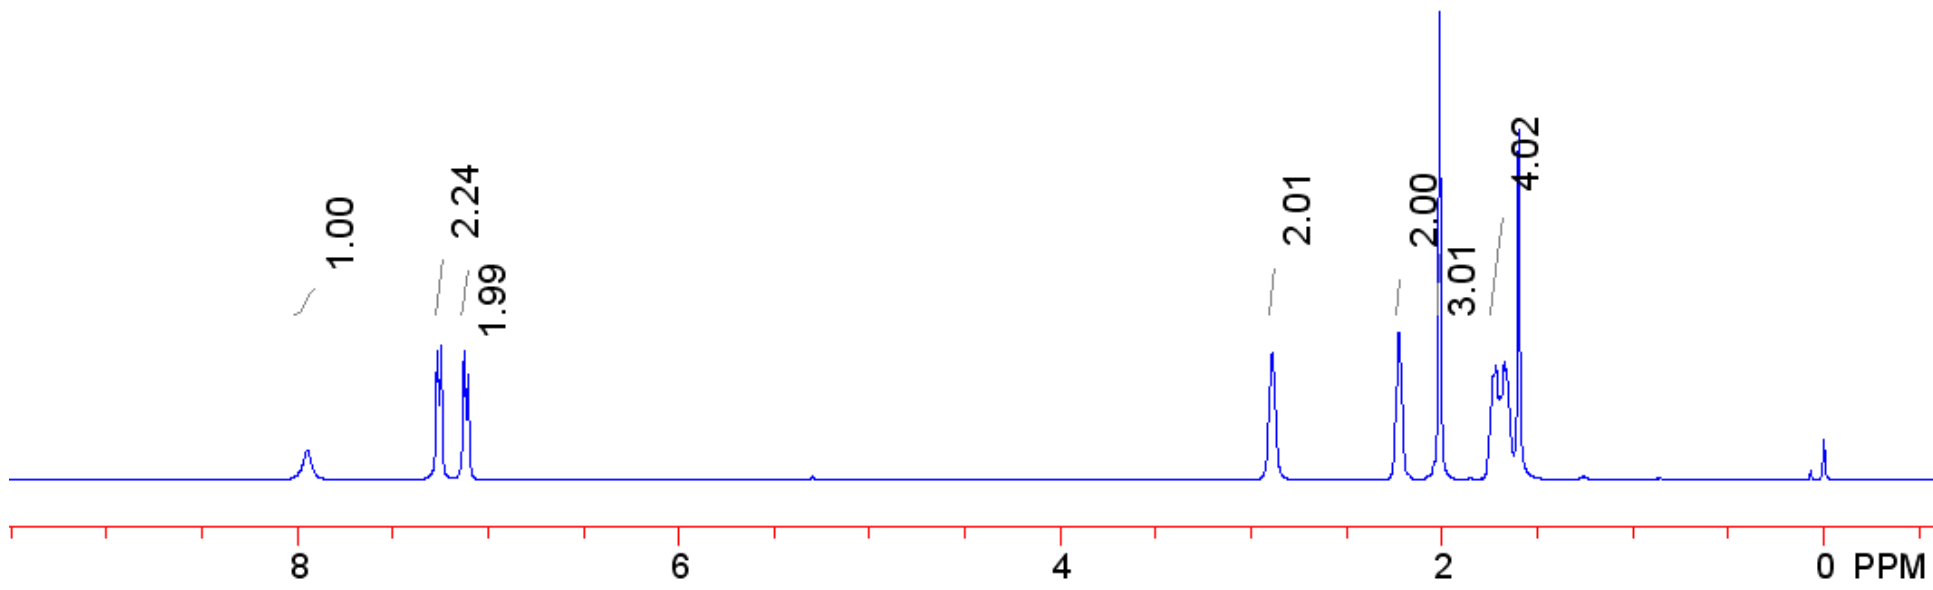

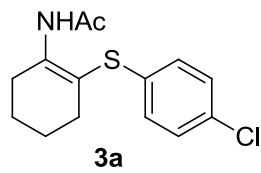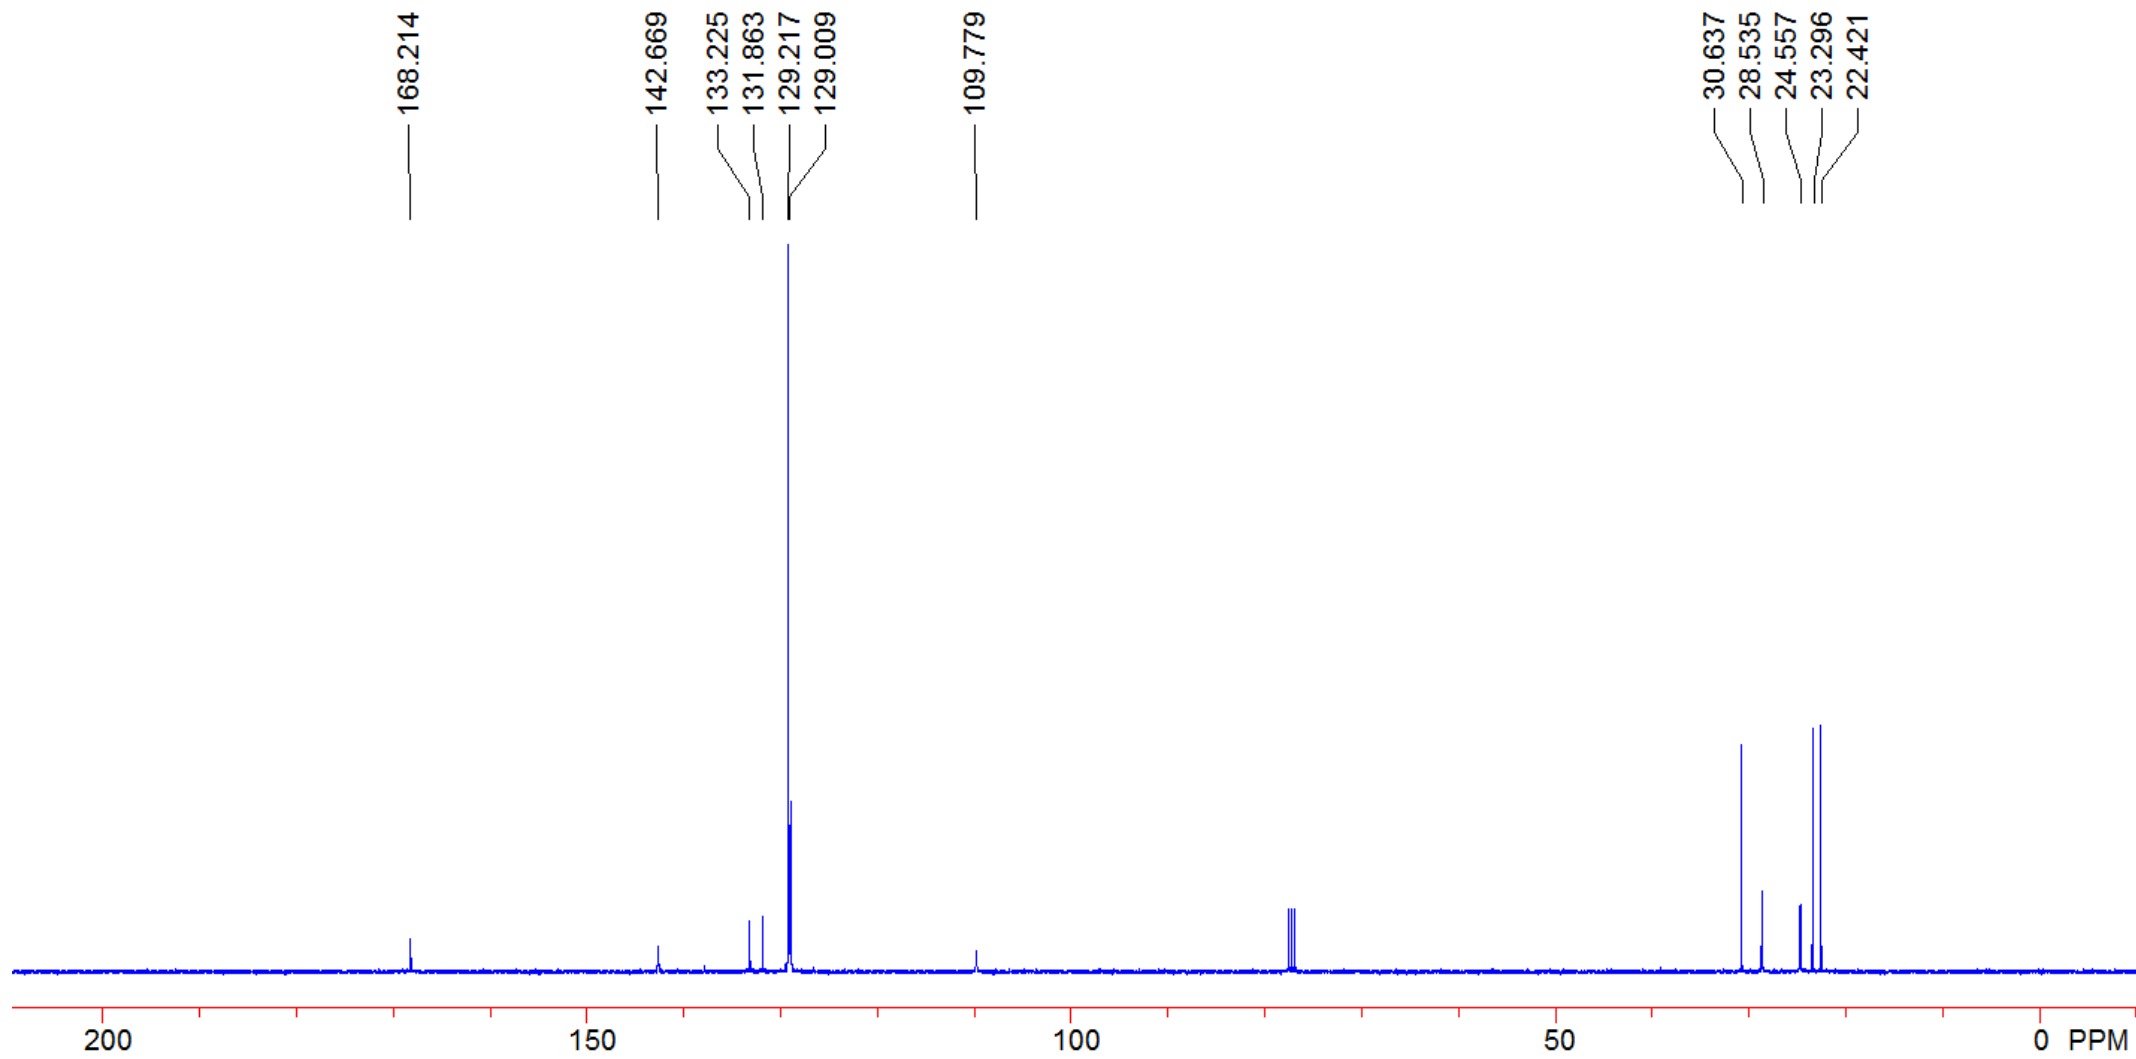

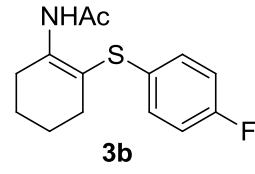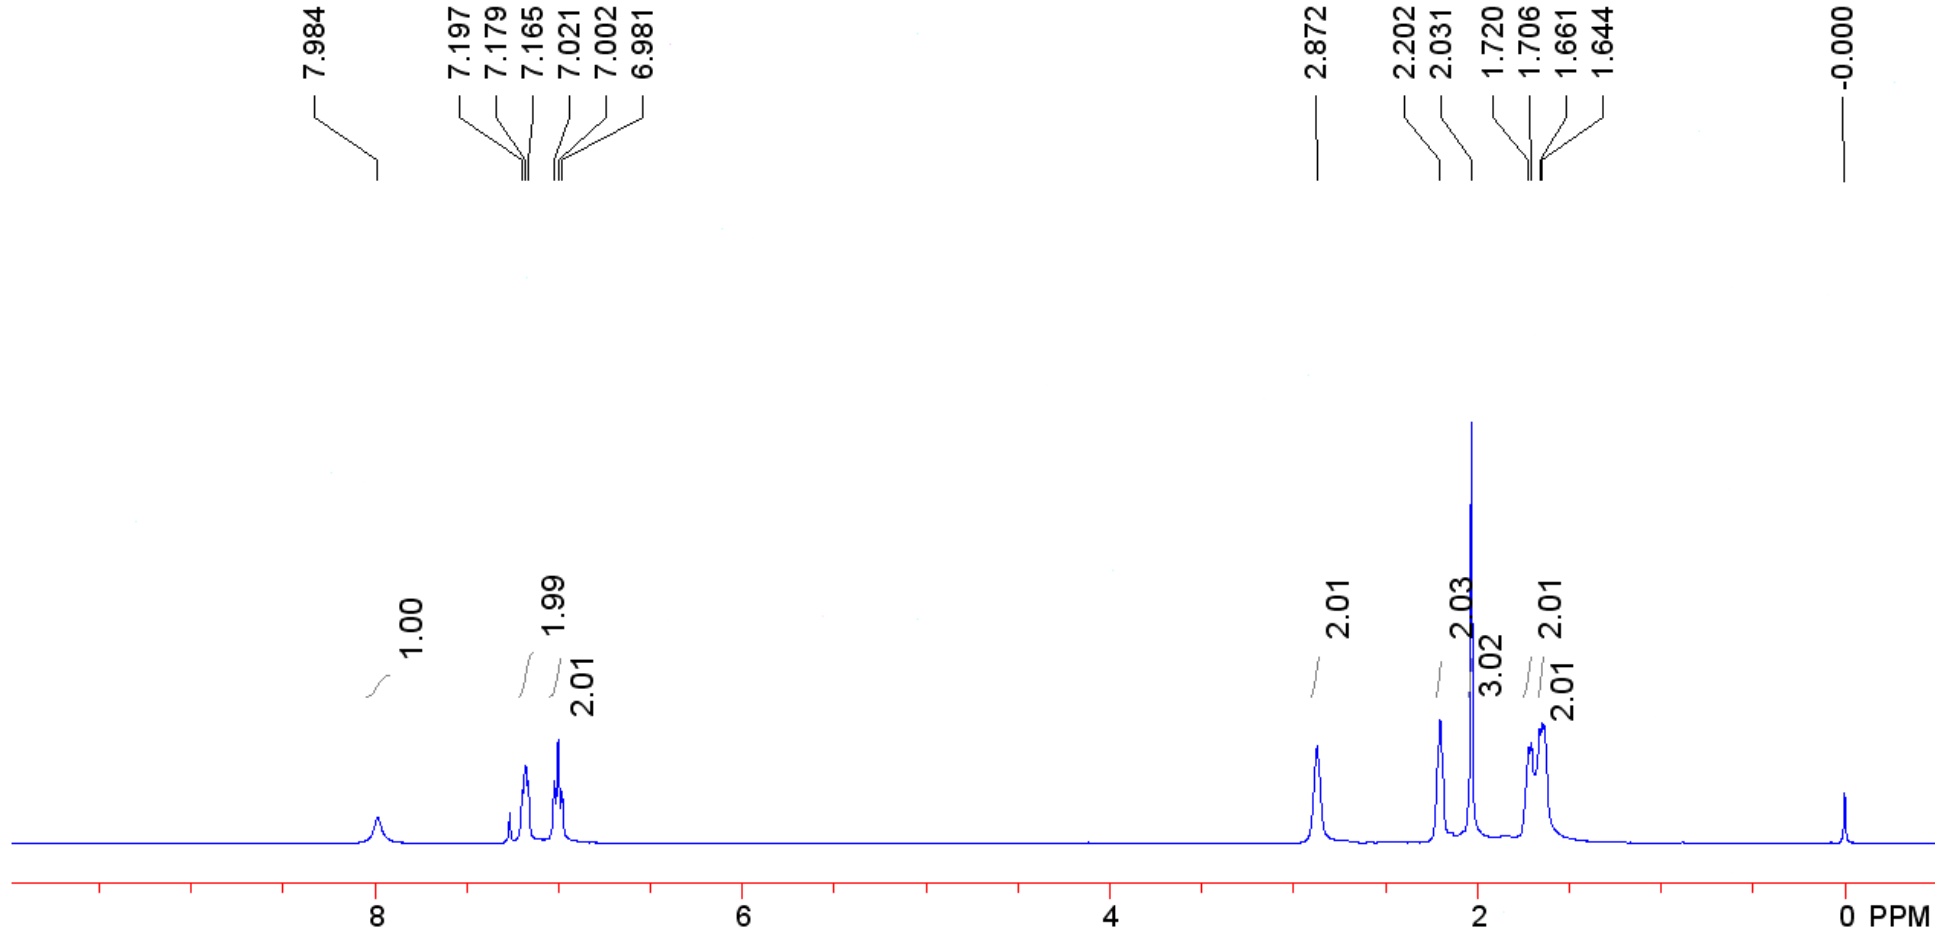

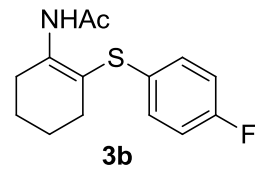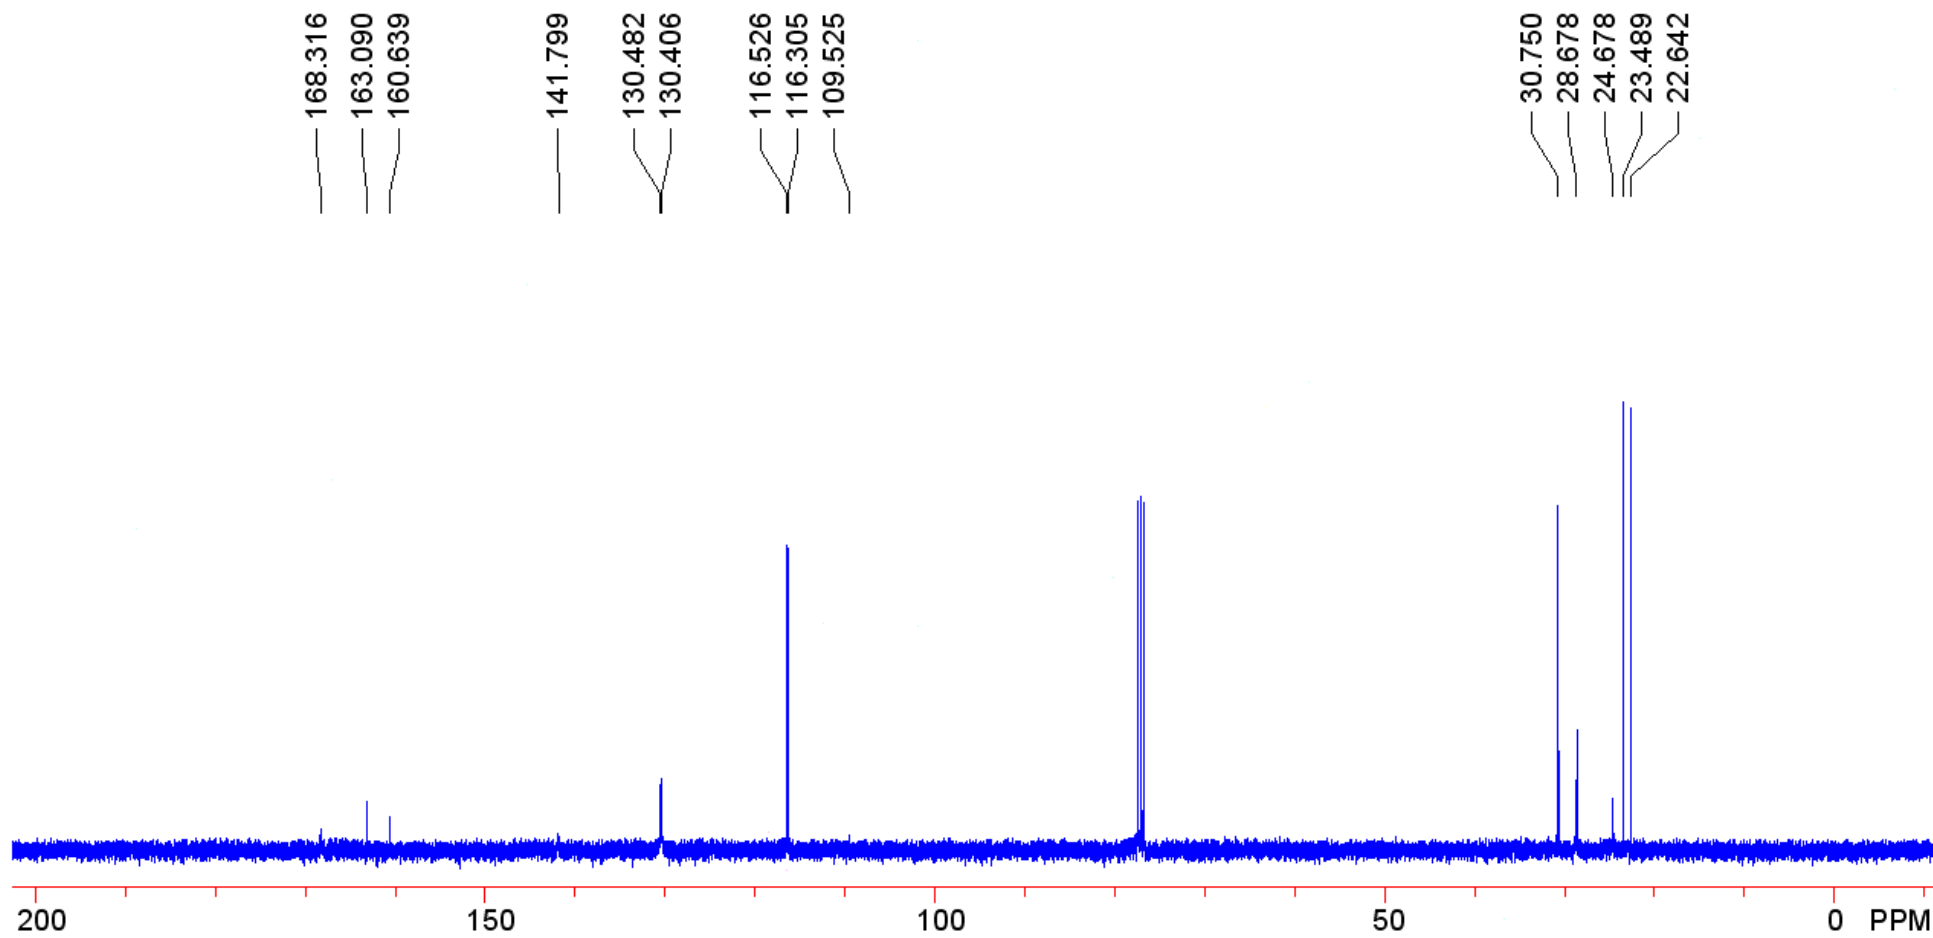



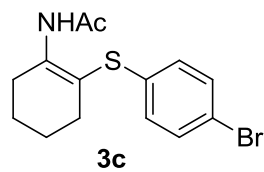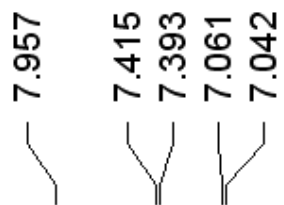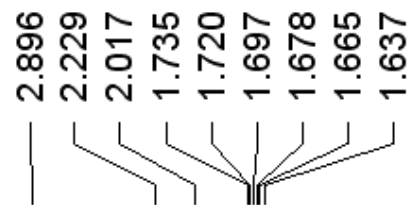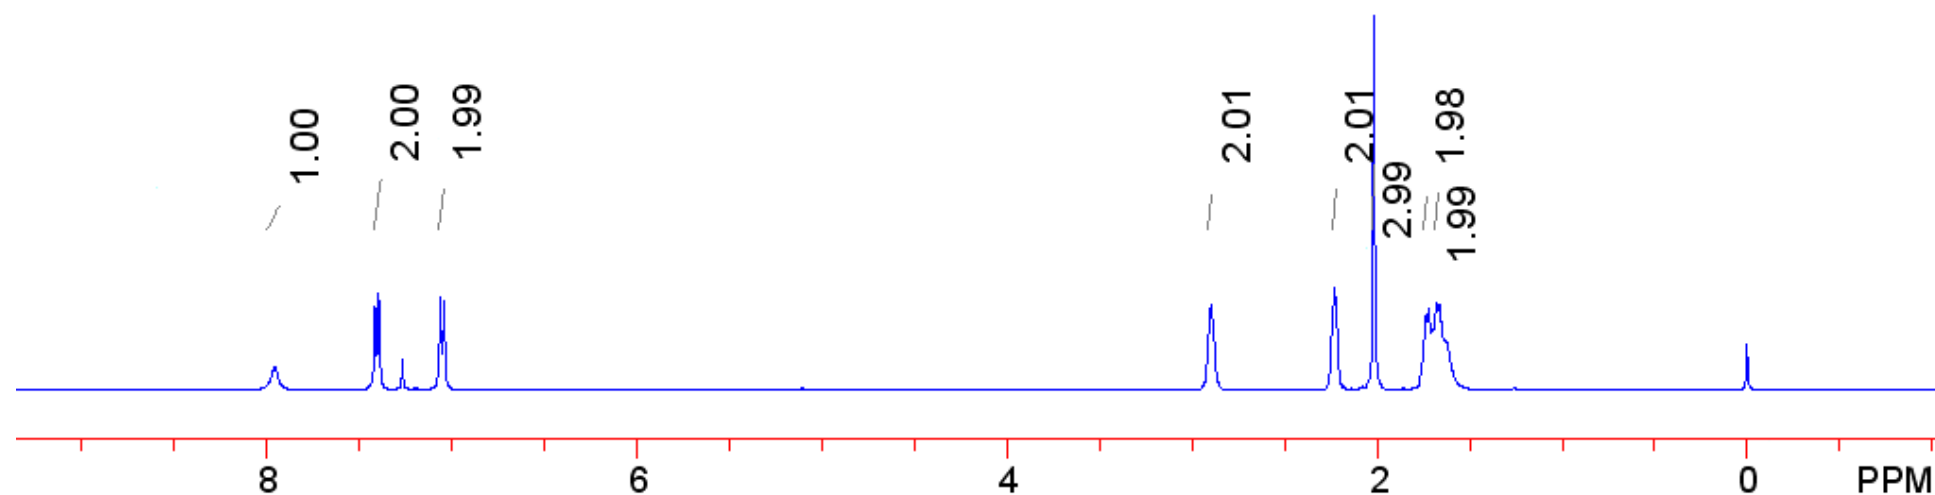

1

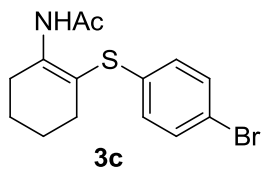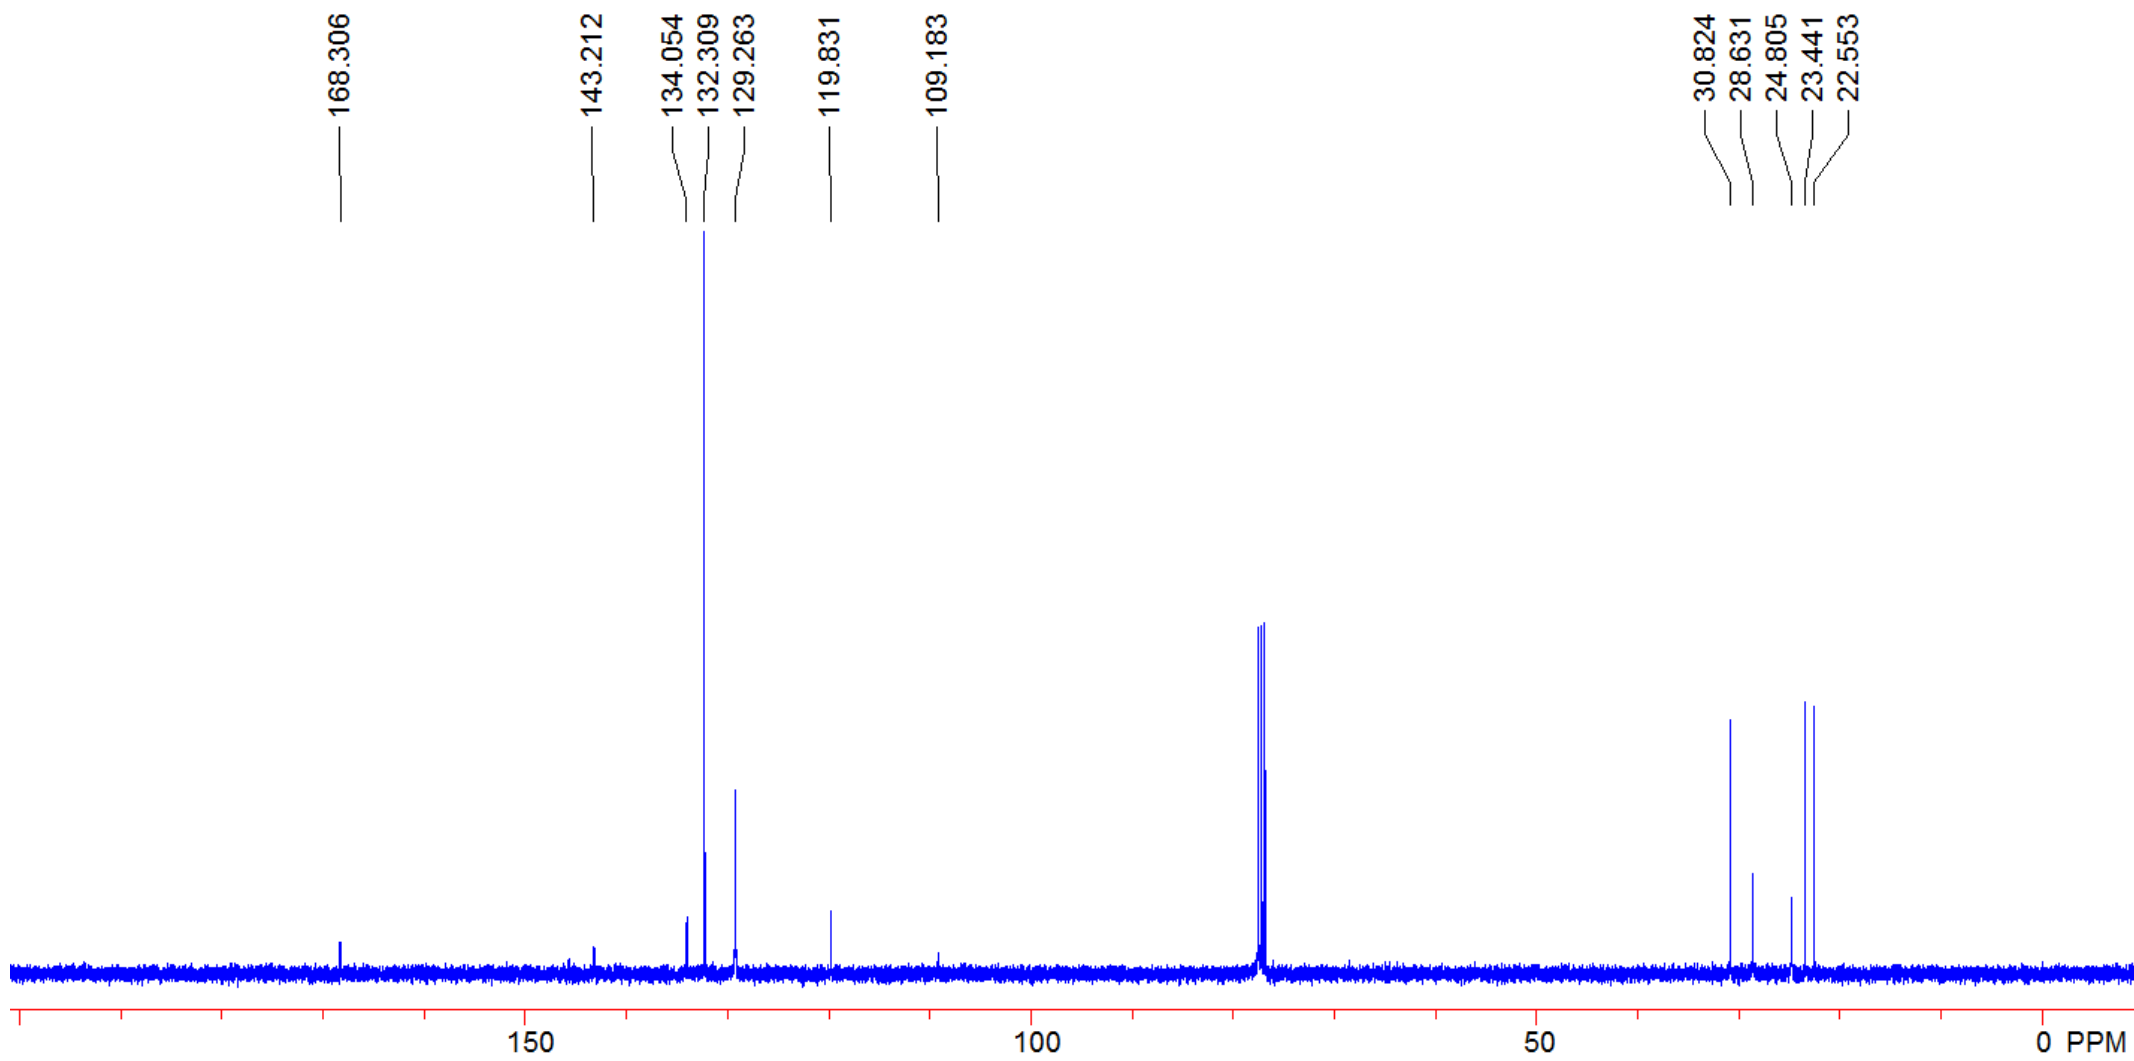

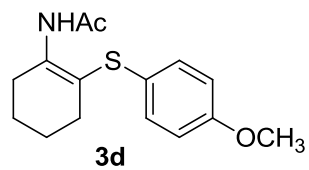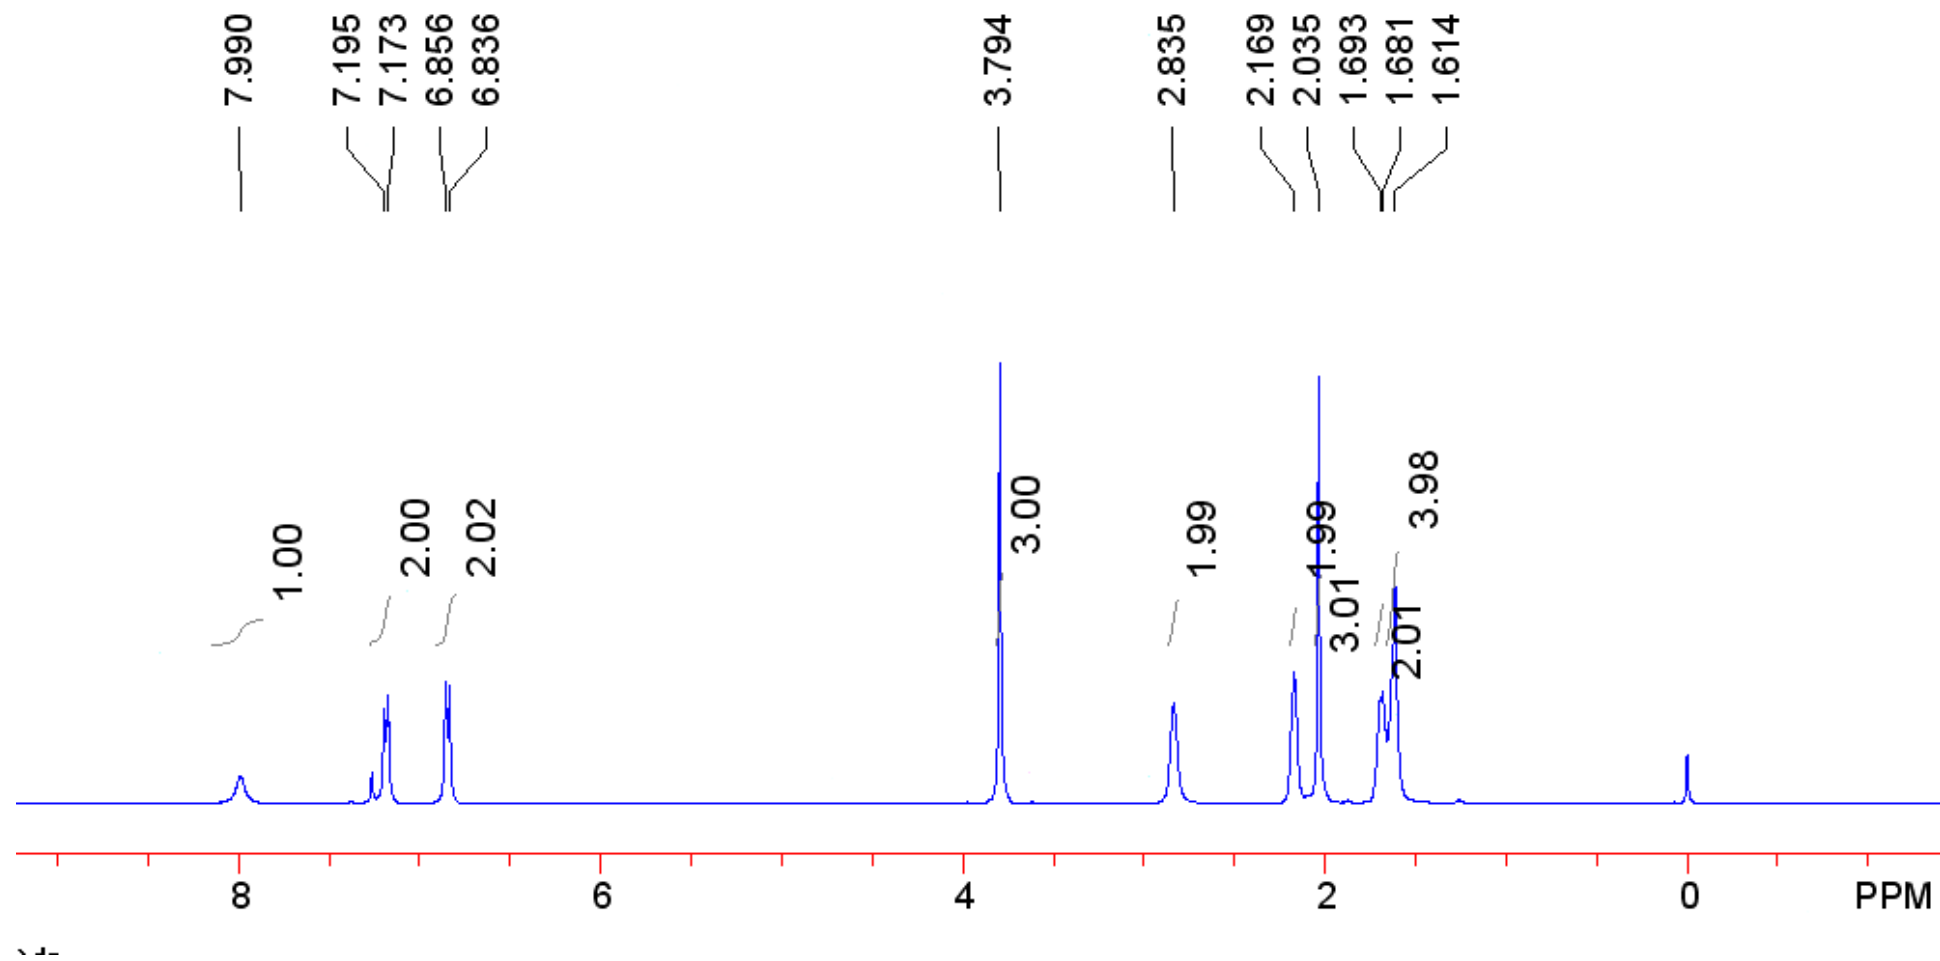

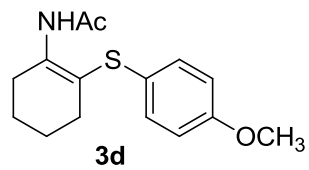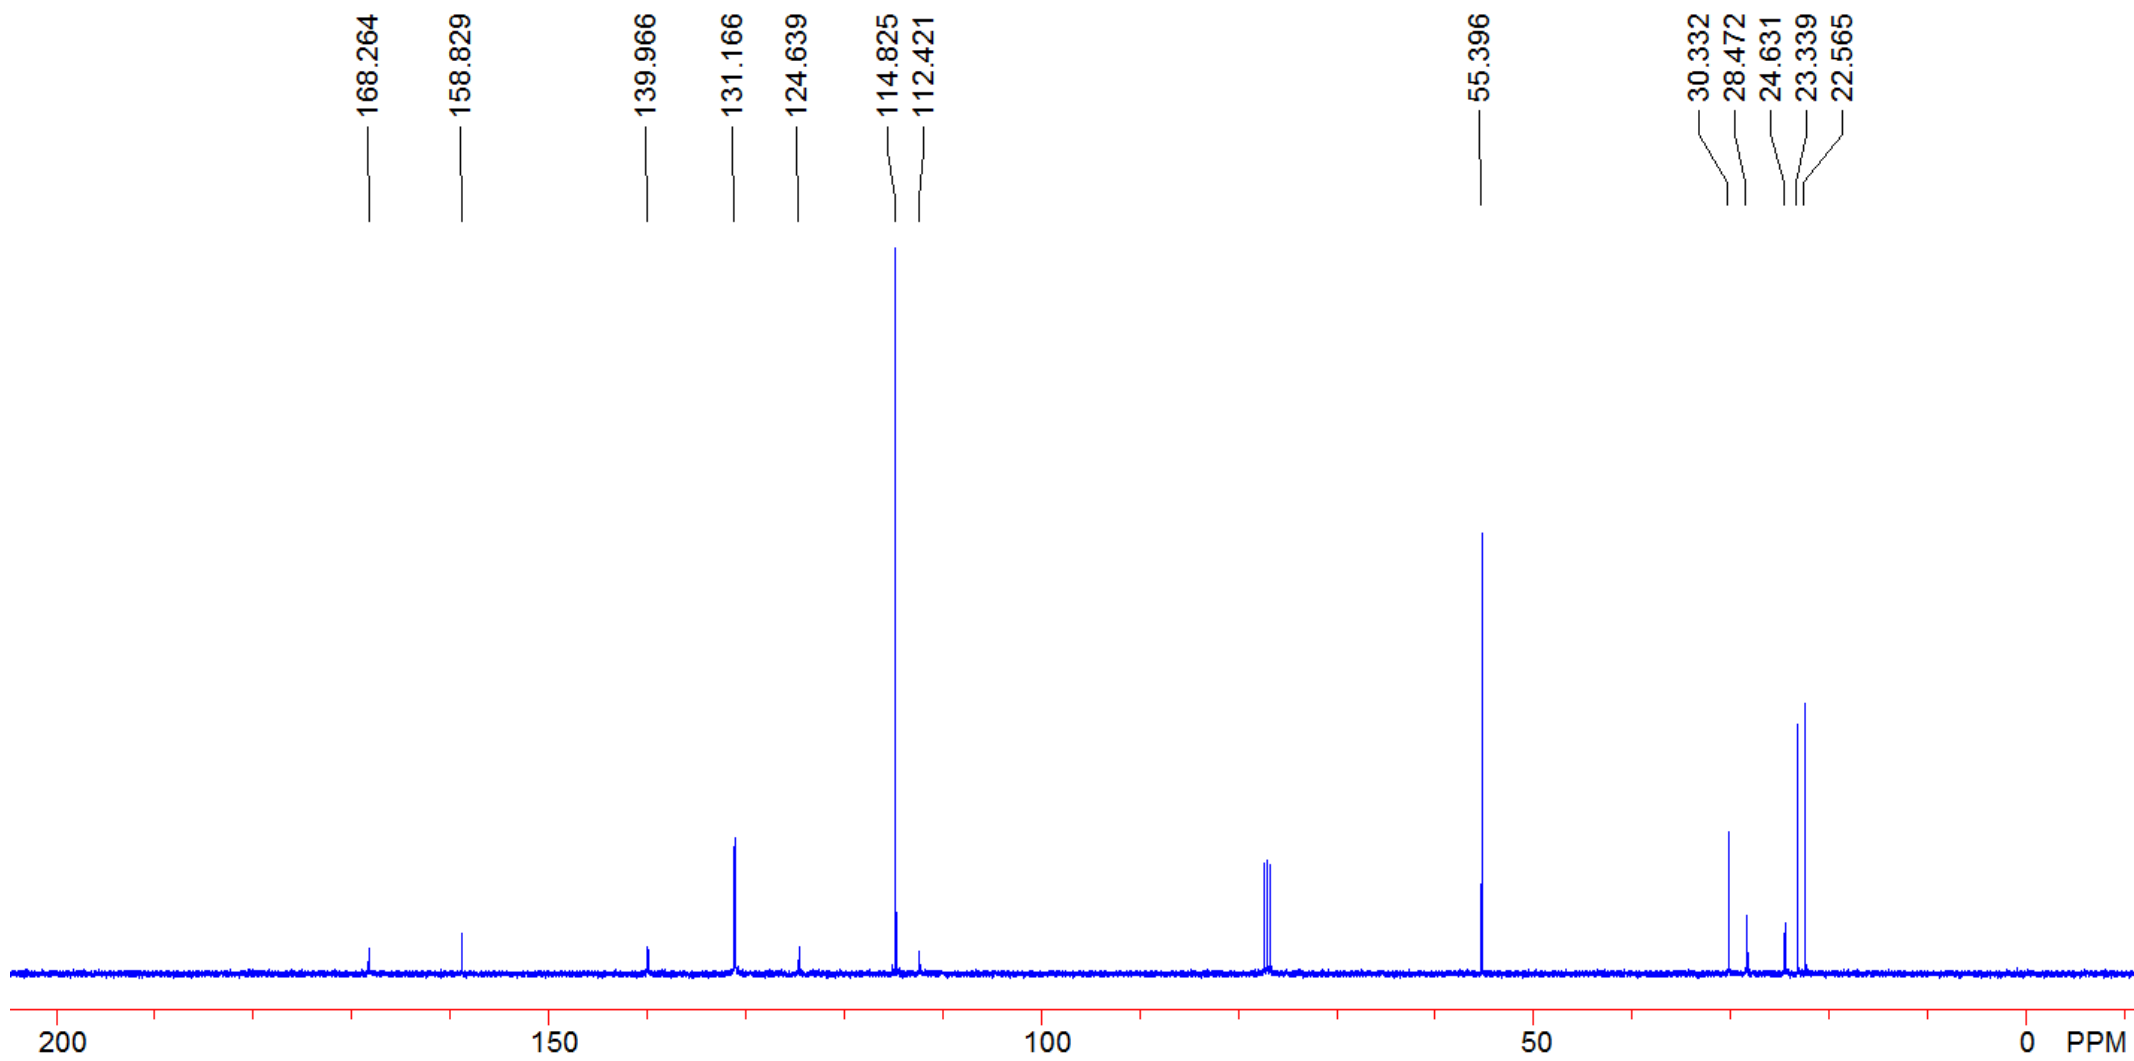

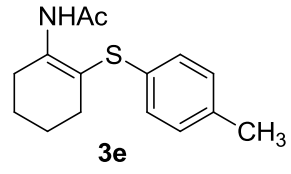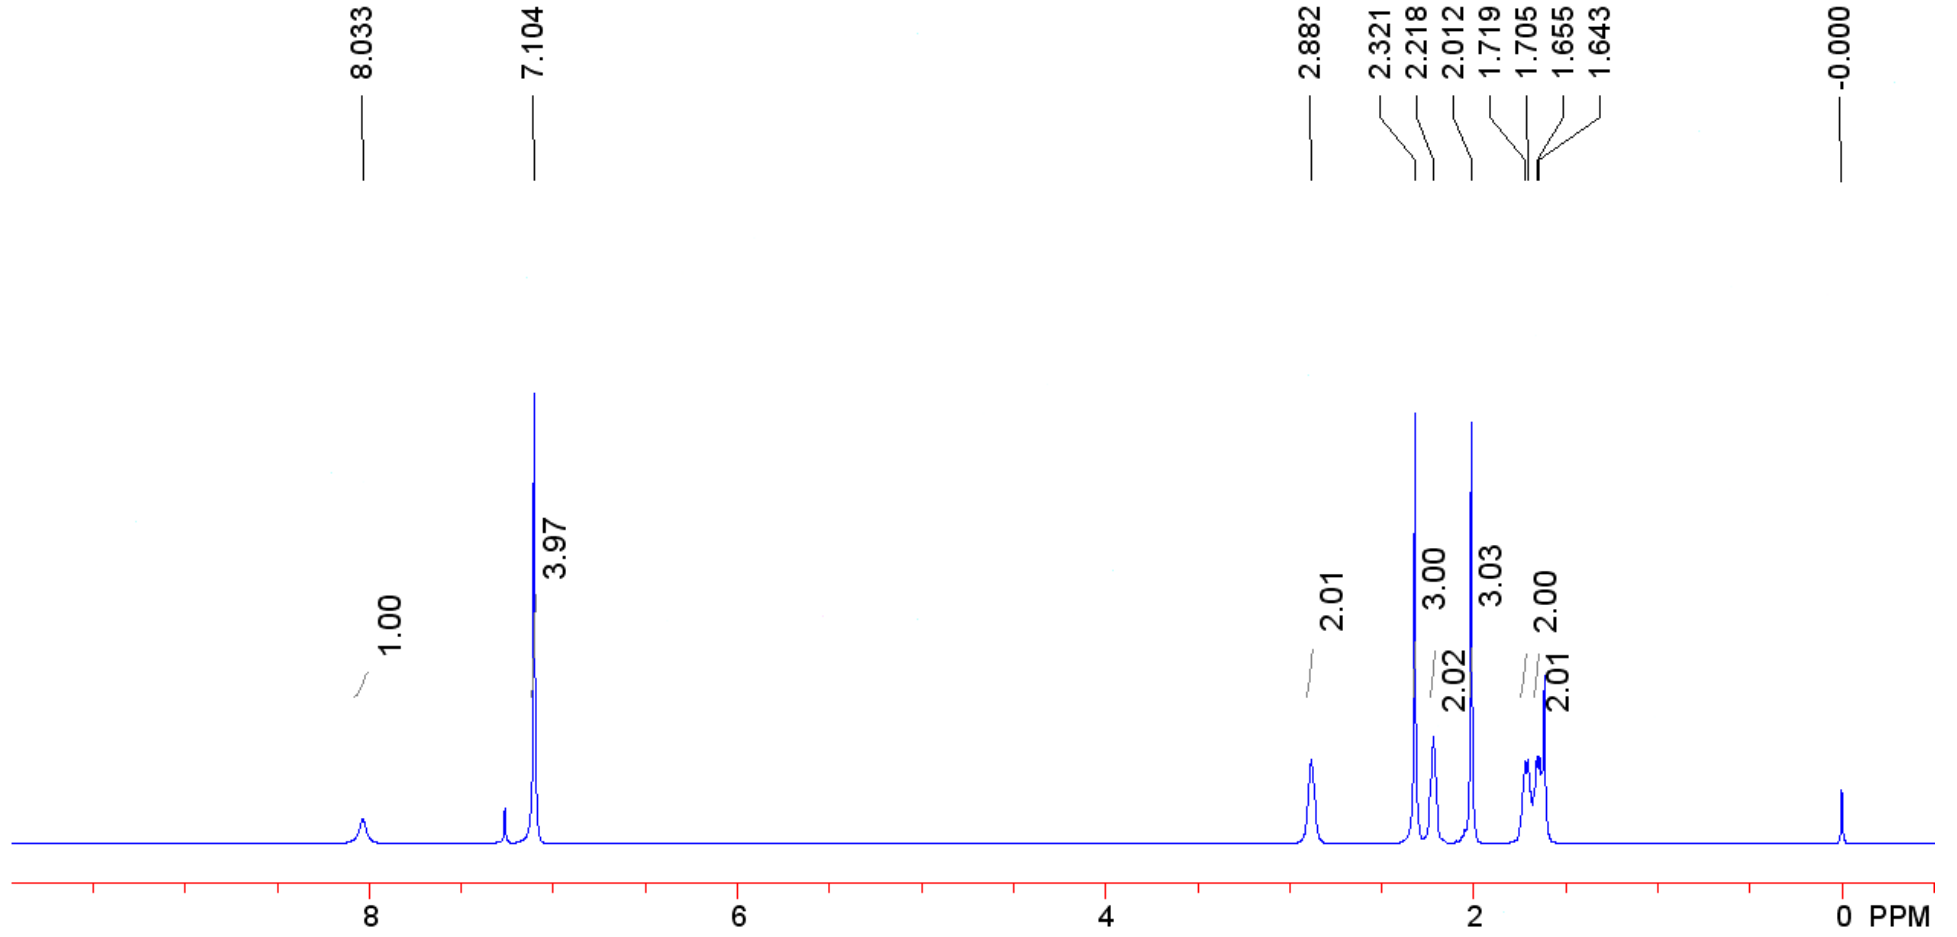

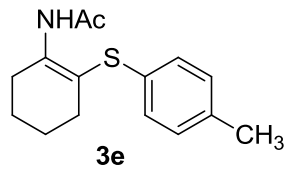

168.306

141.762

136.241

130.954

130.035

128.407

110.497

30.709

28.519

24.784

23.451

22.626

21.087

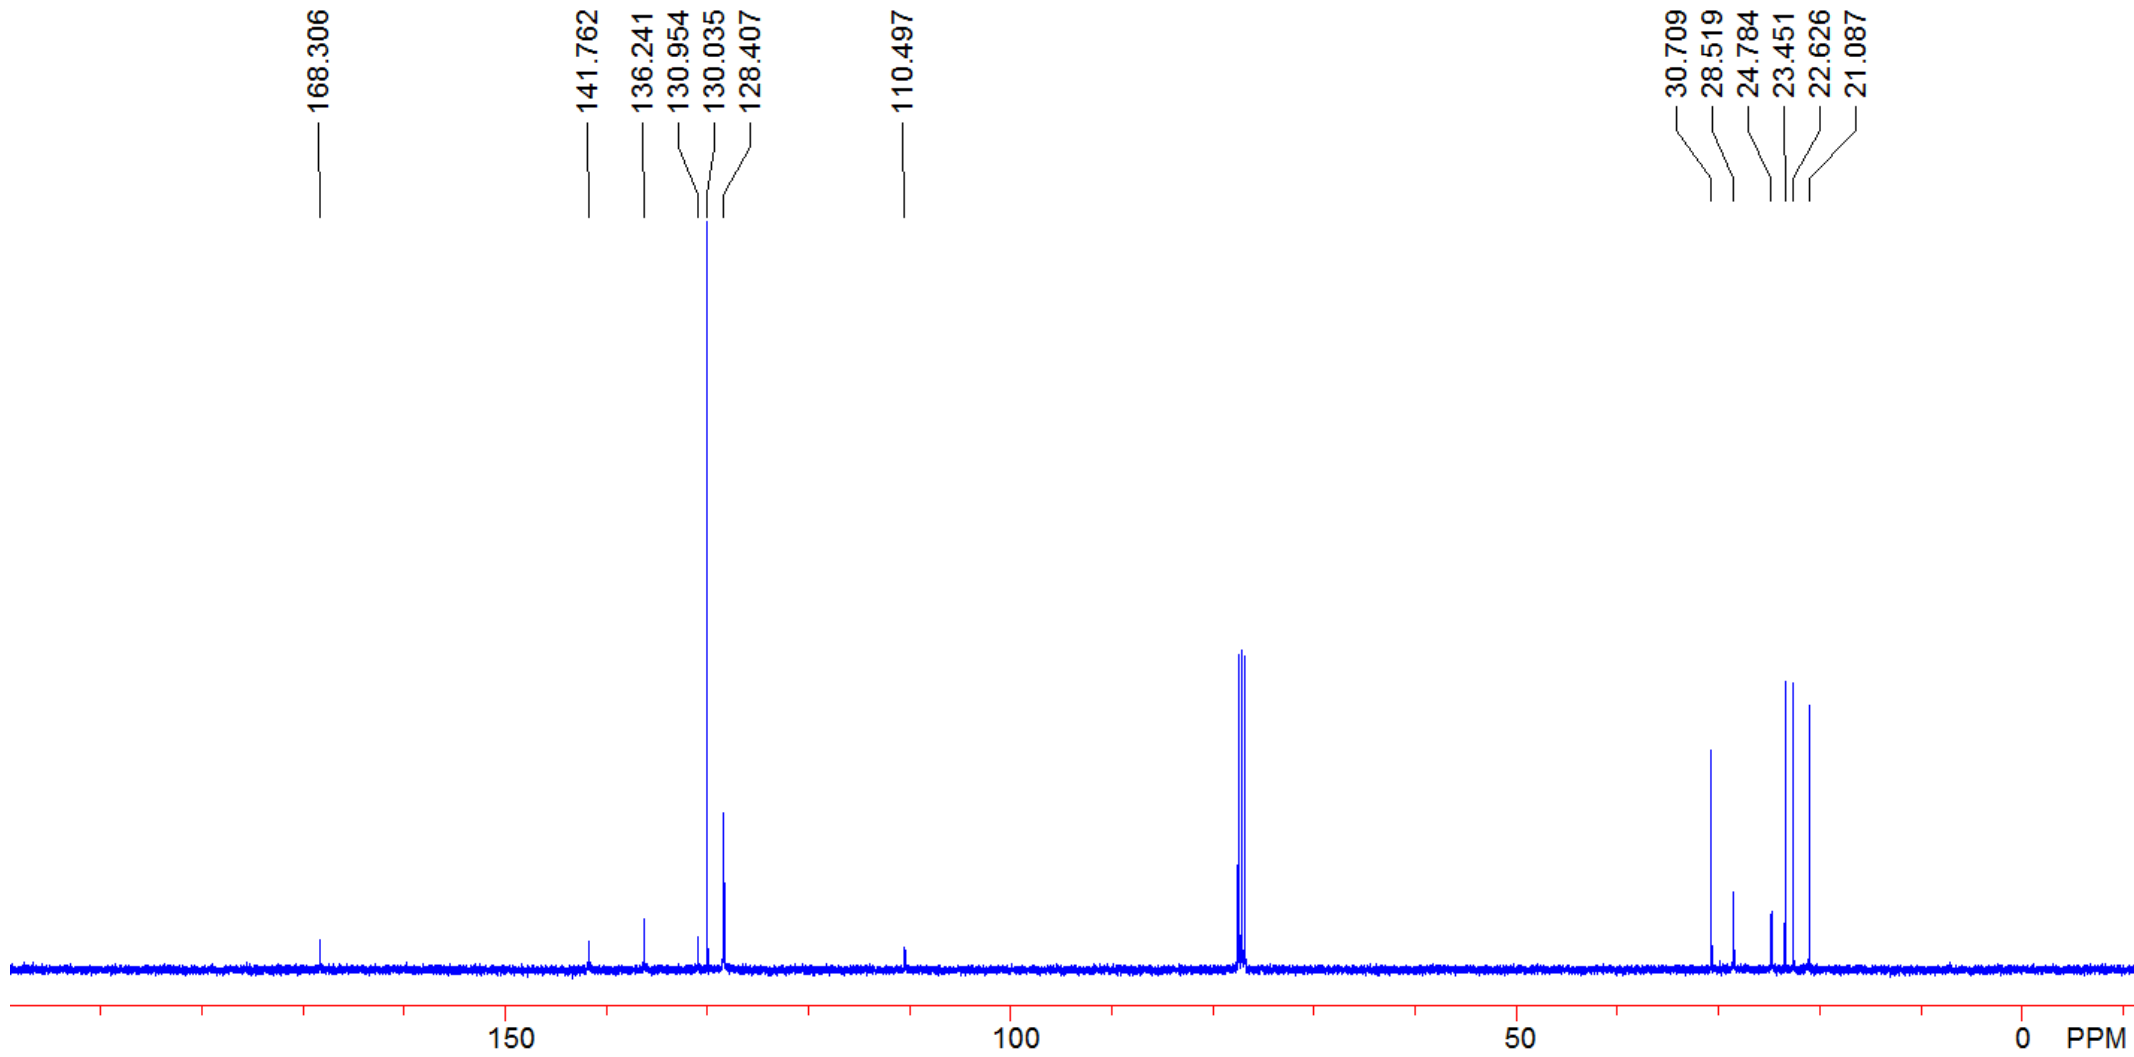

150

100

50

0 PPM

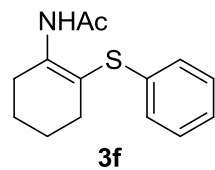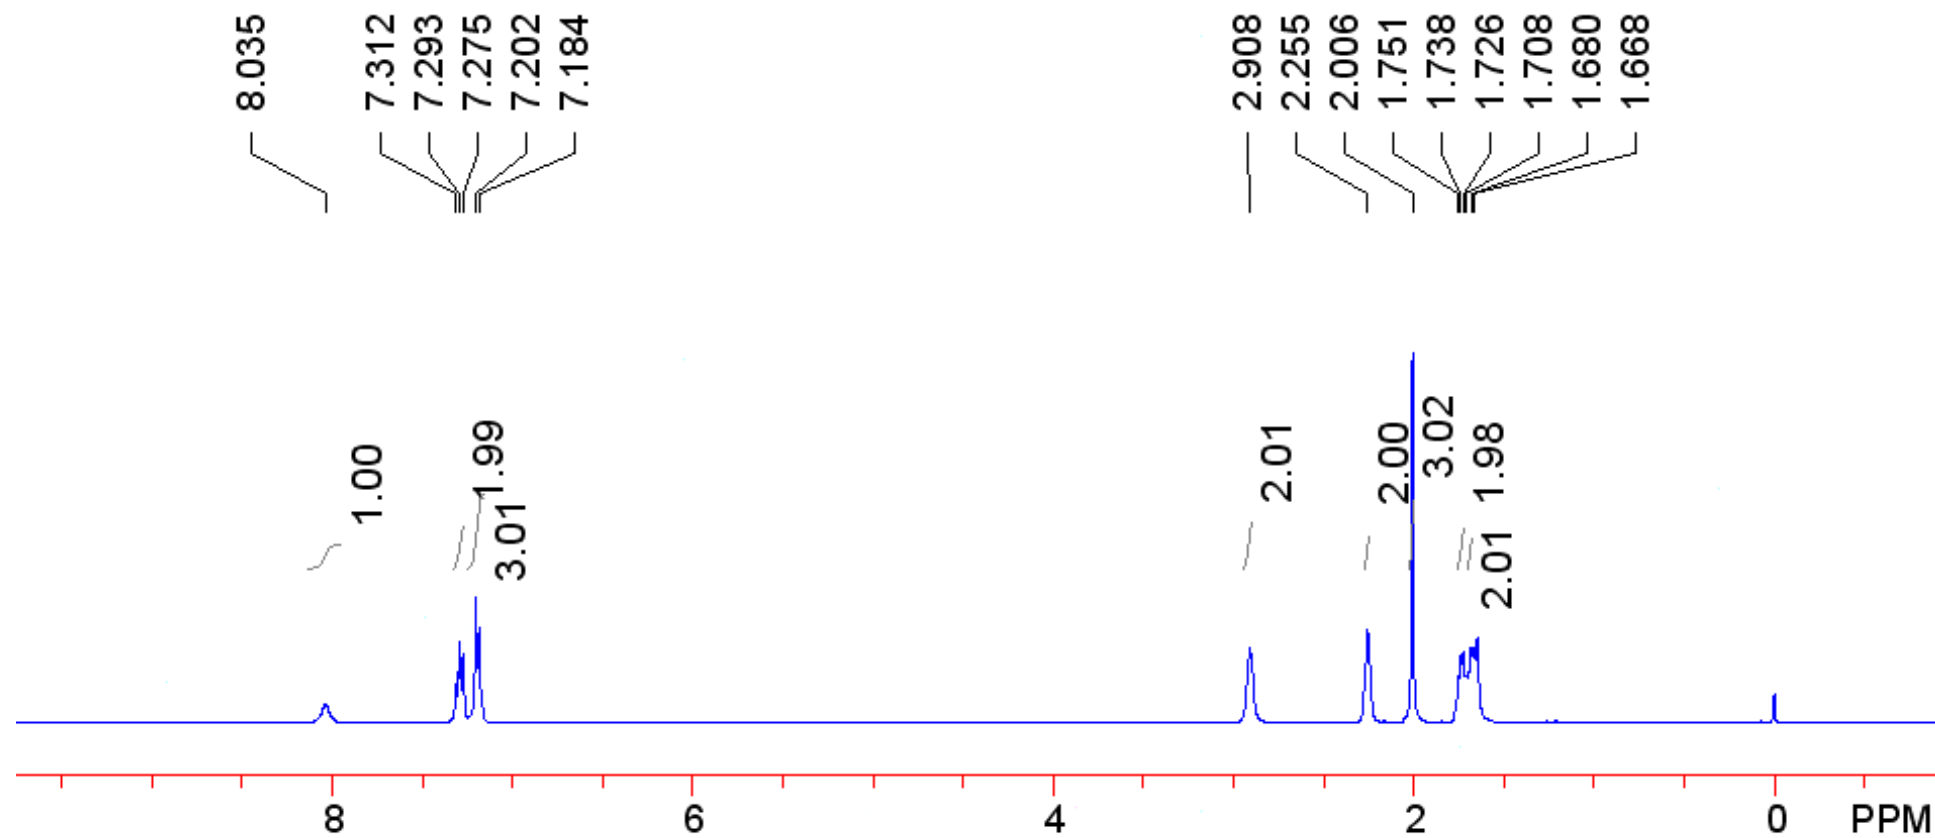

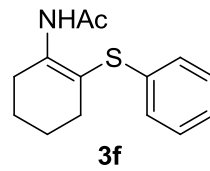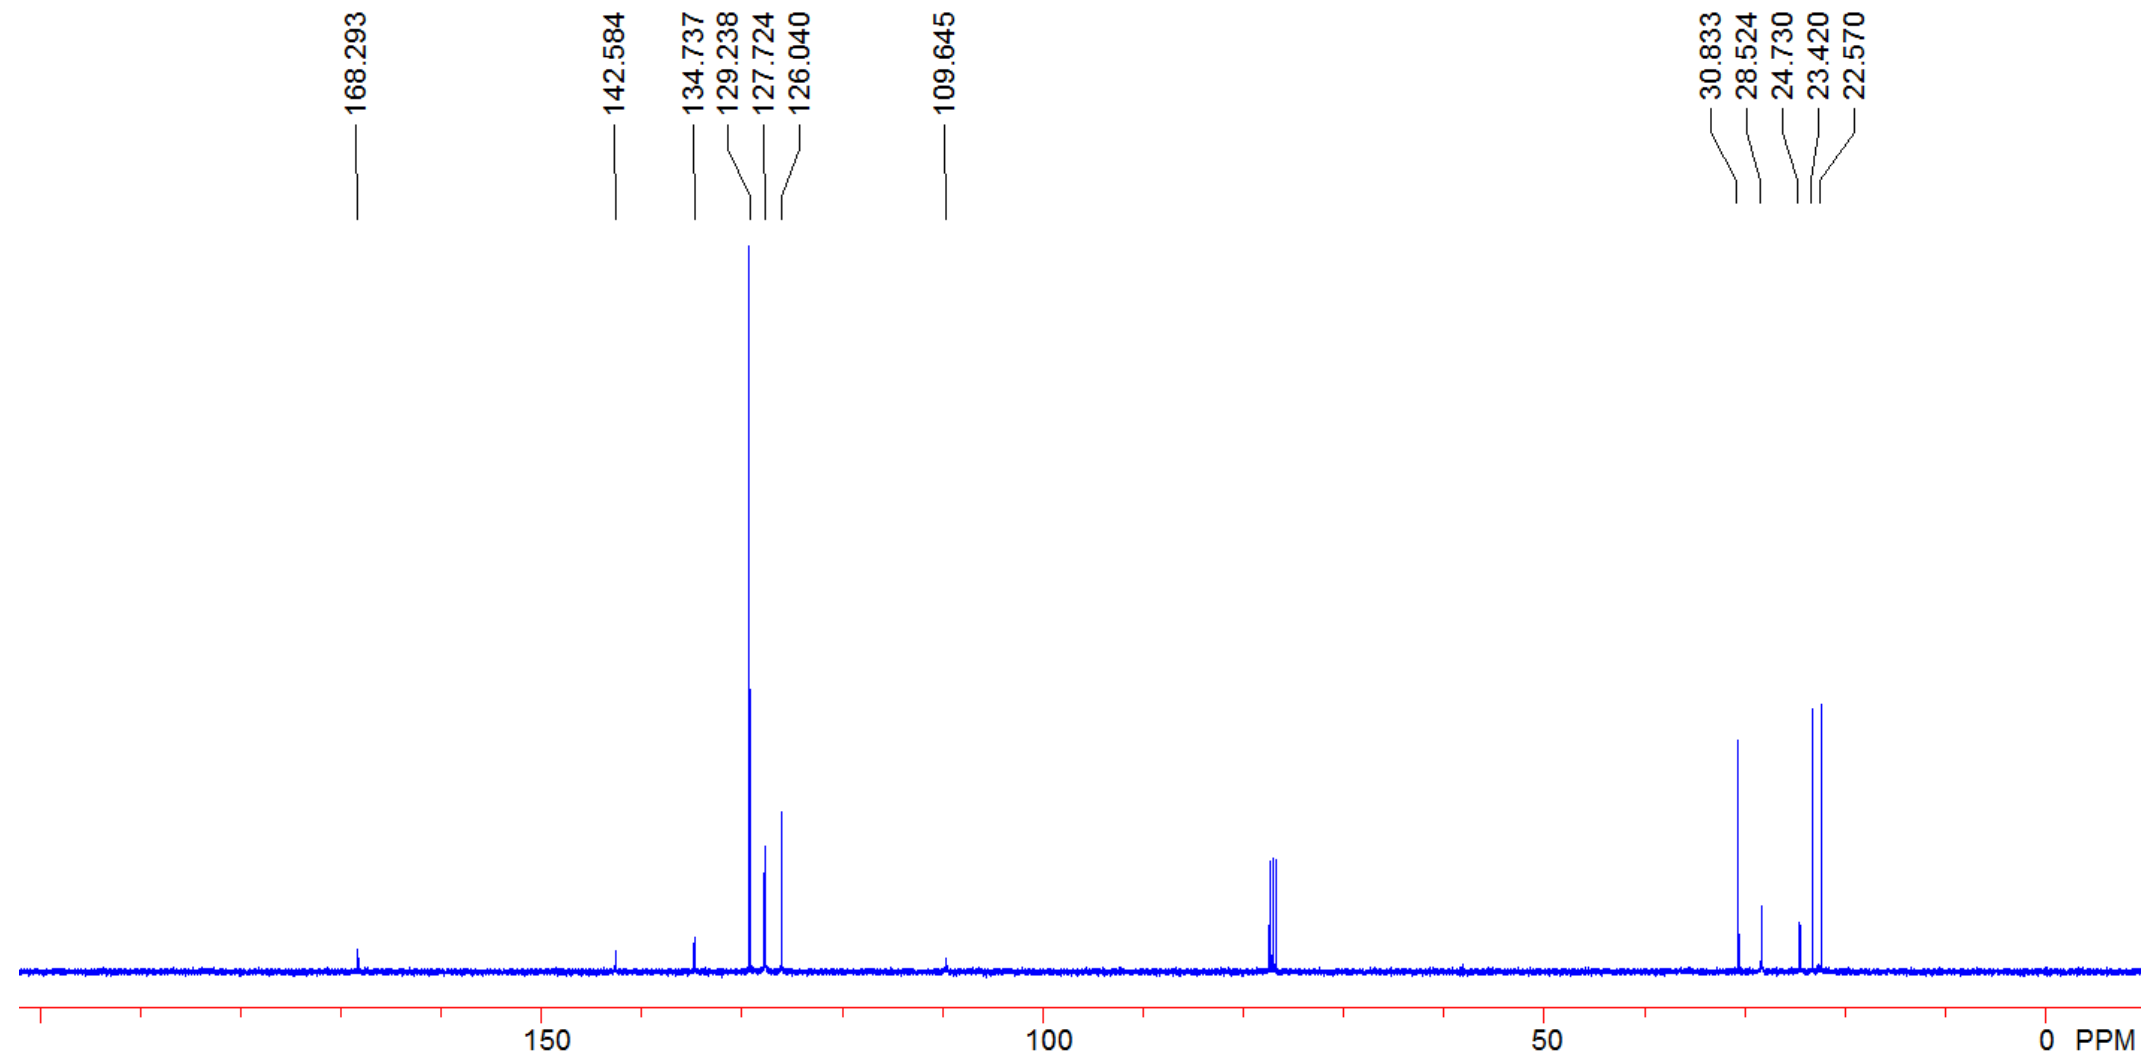



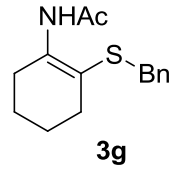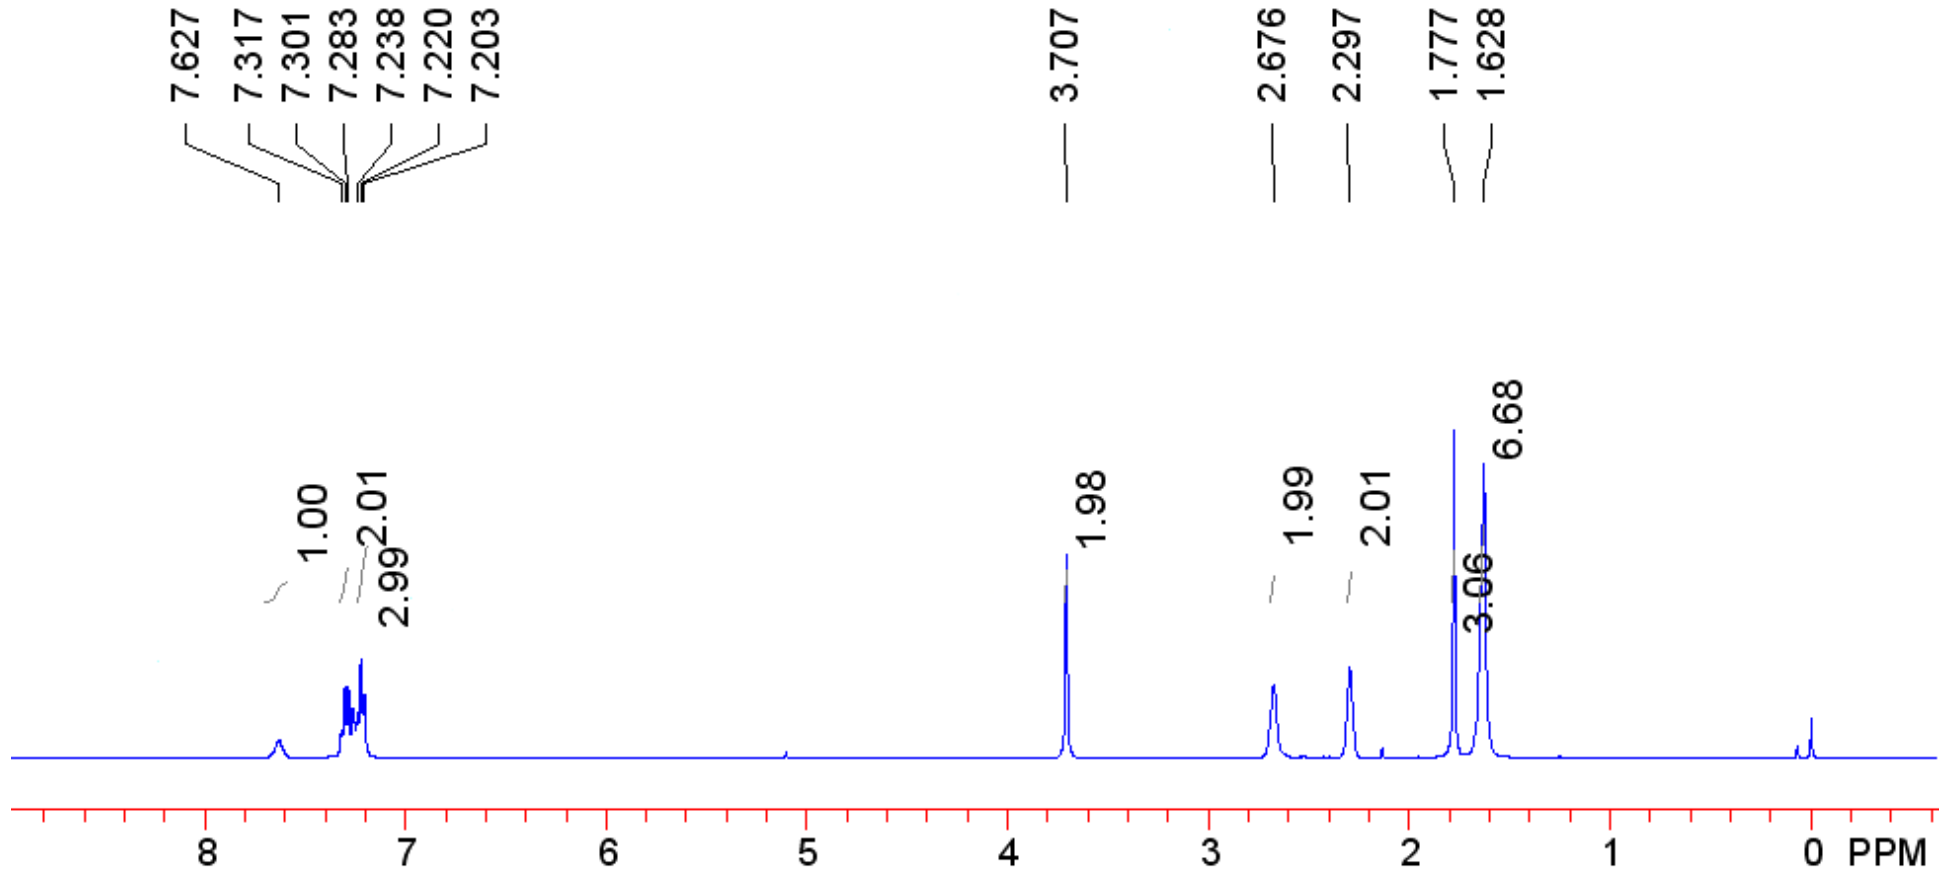

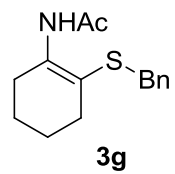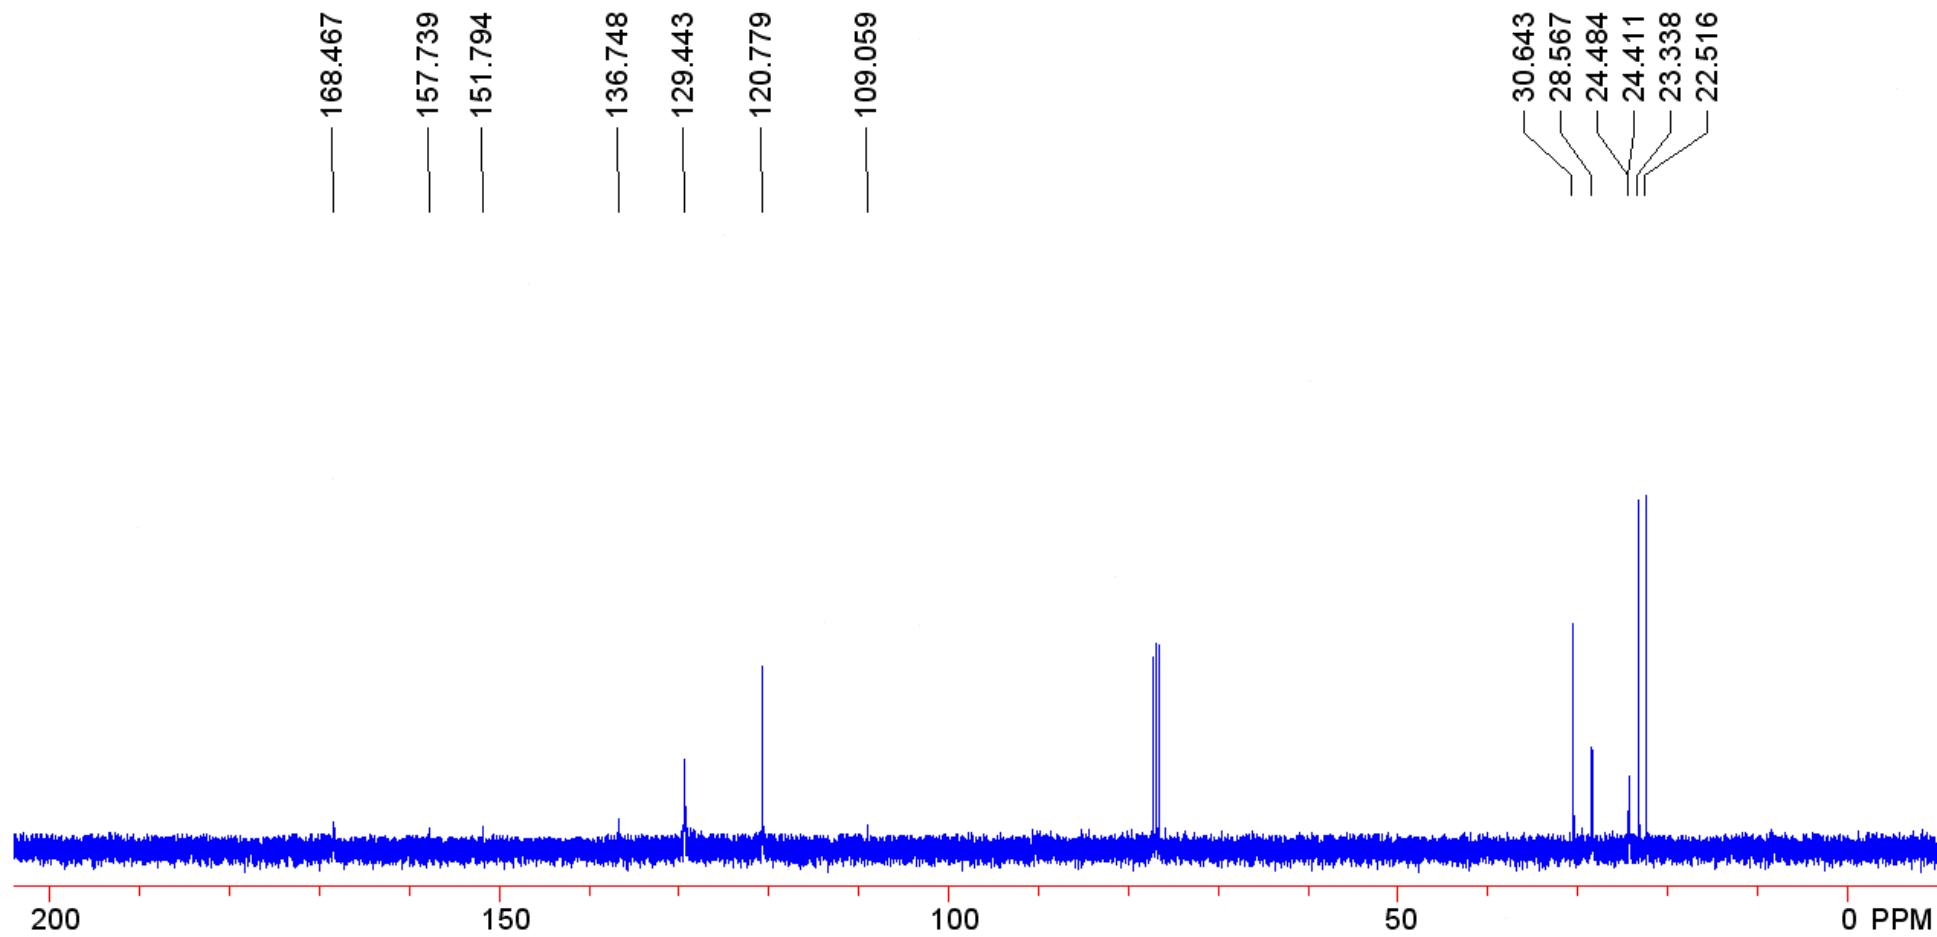

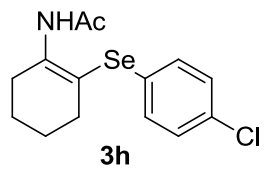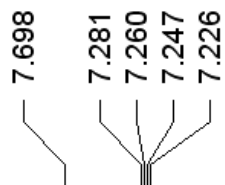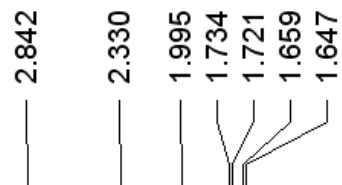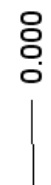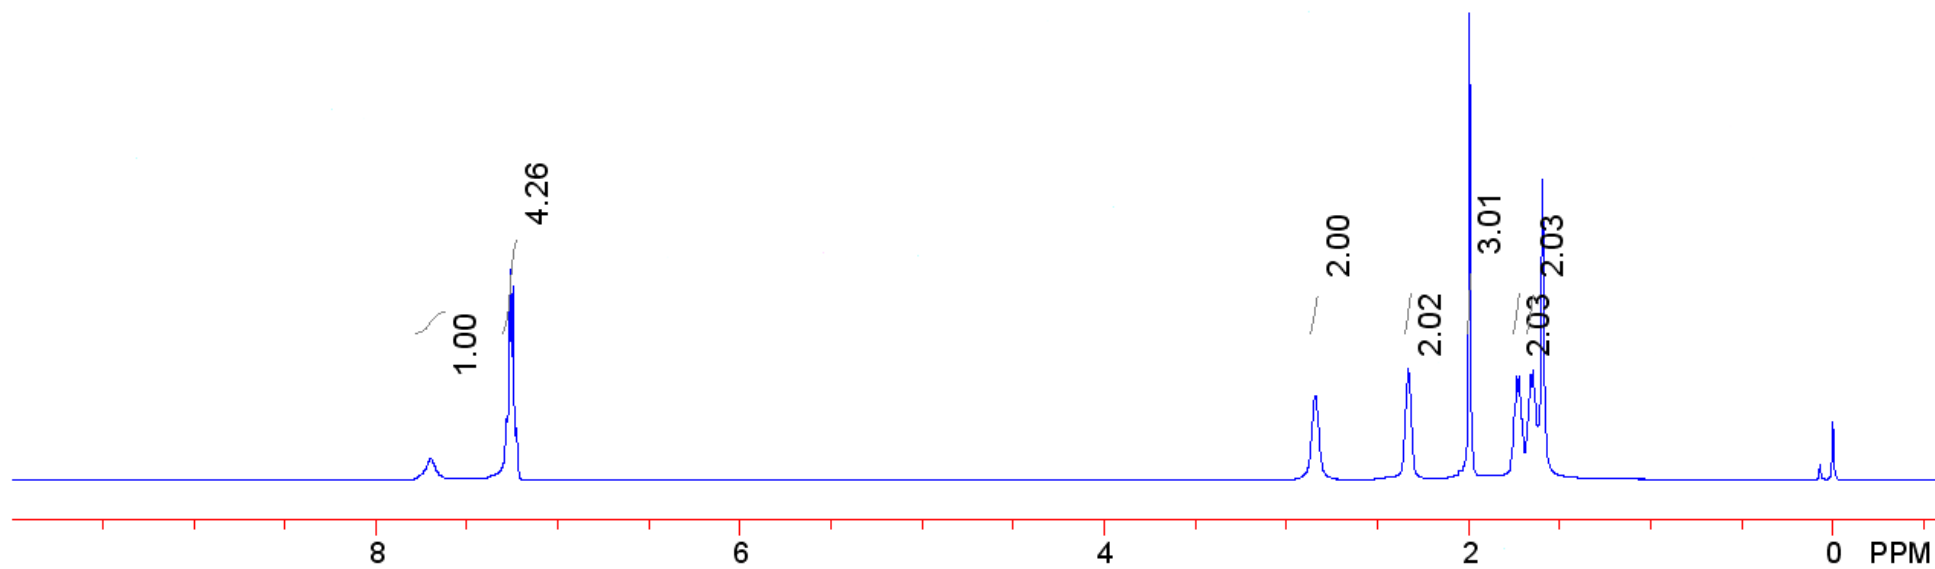

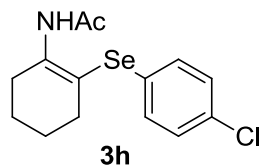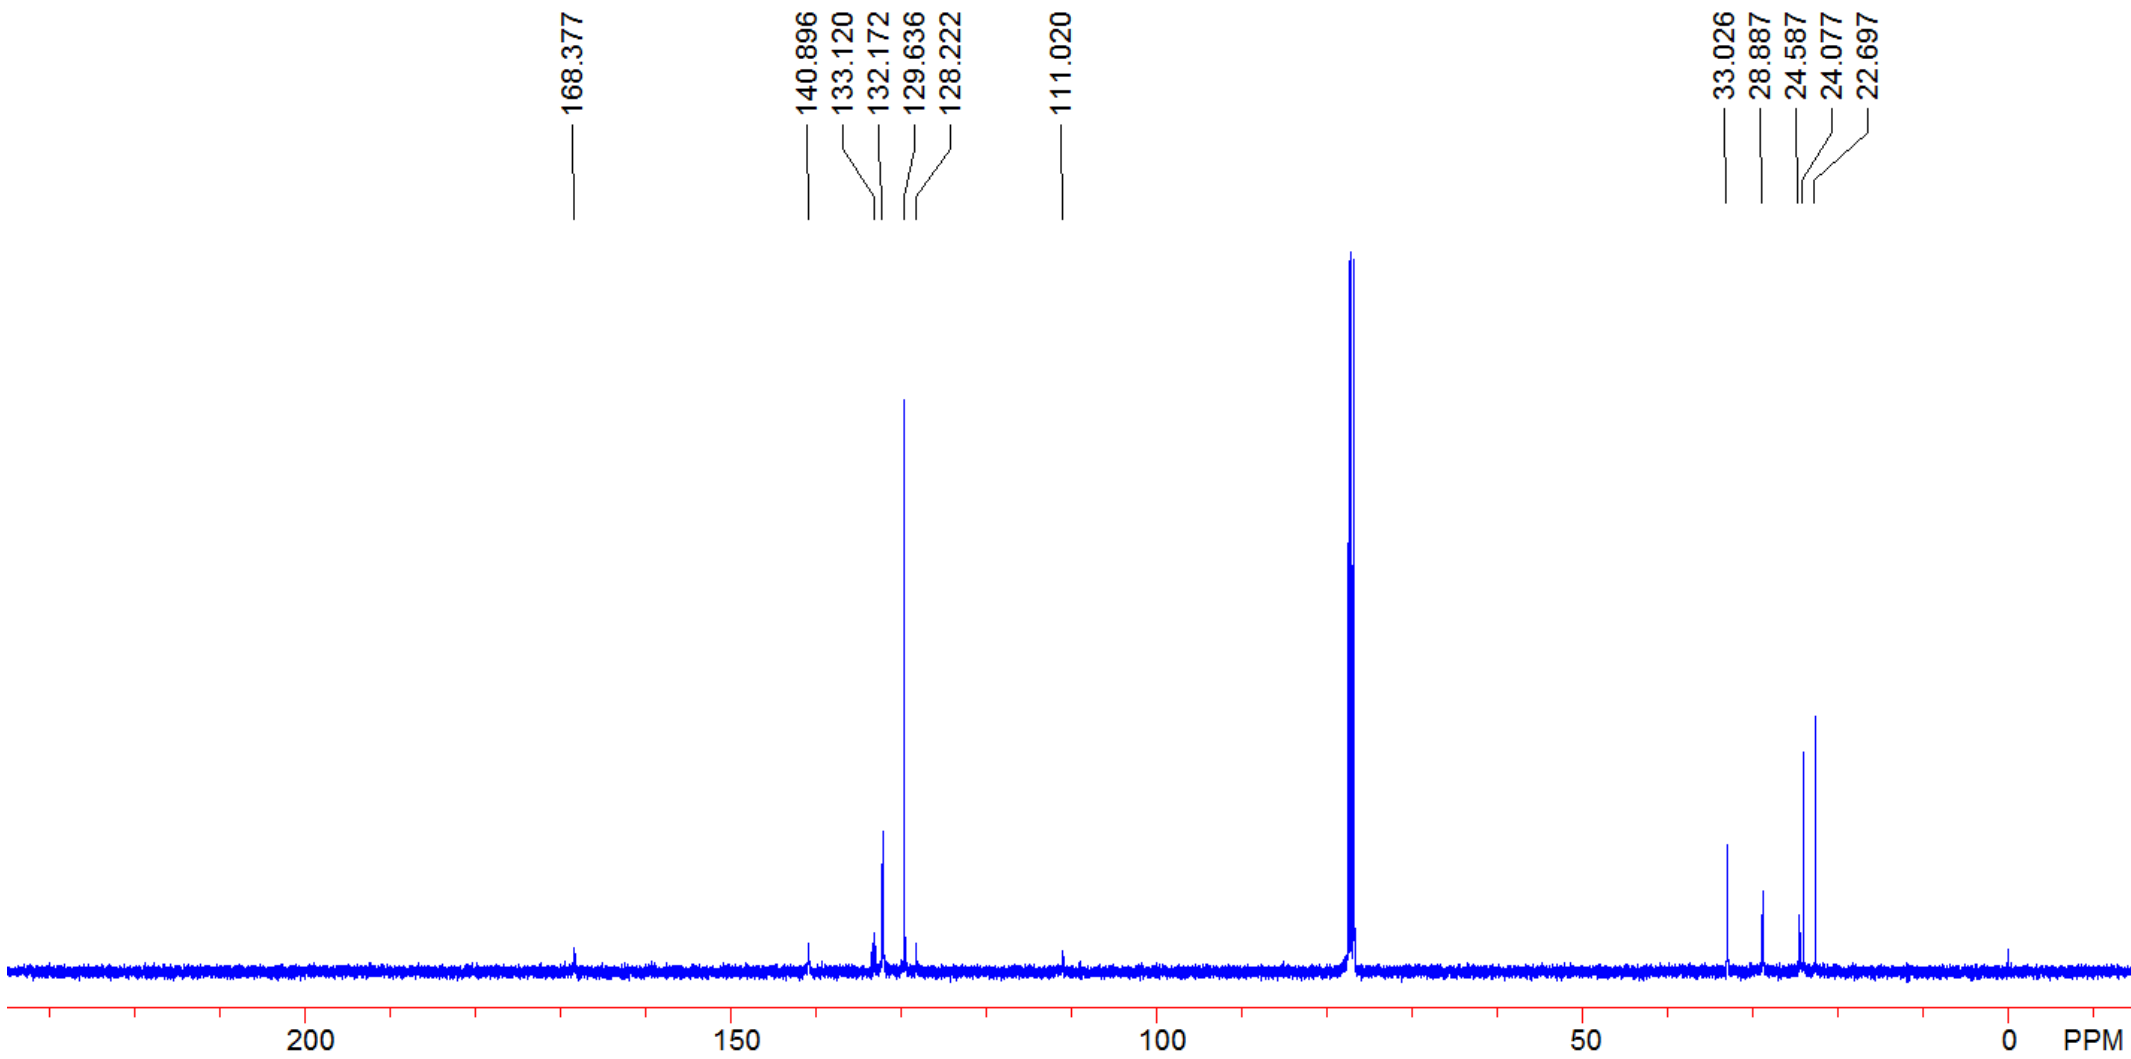

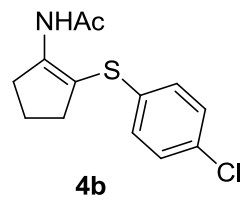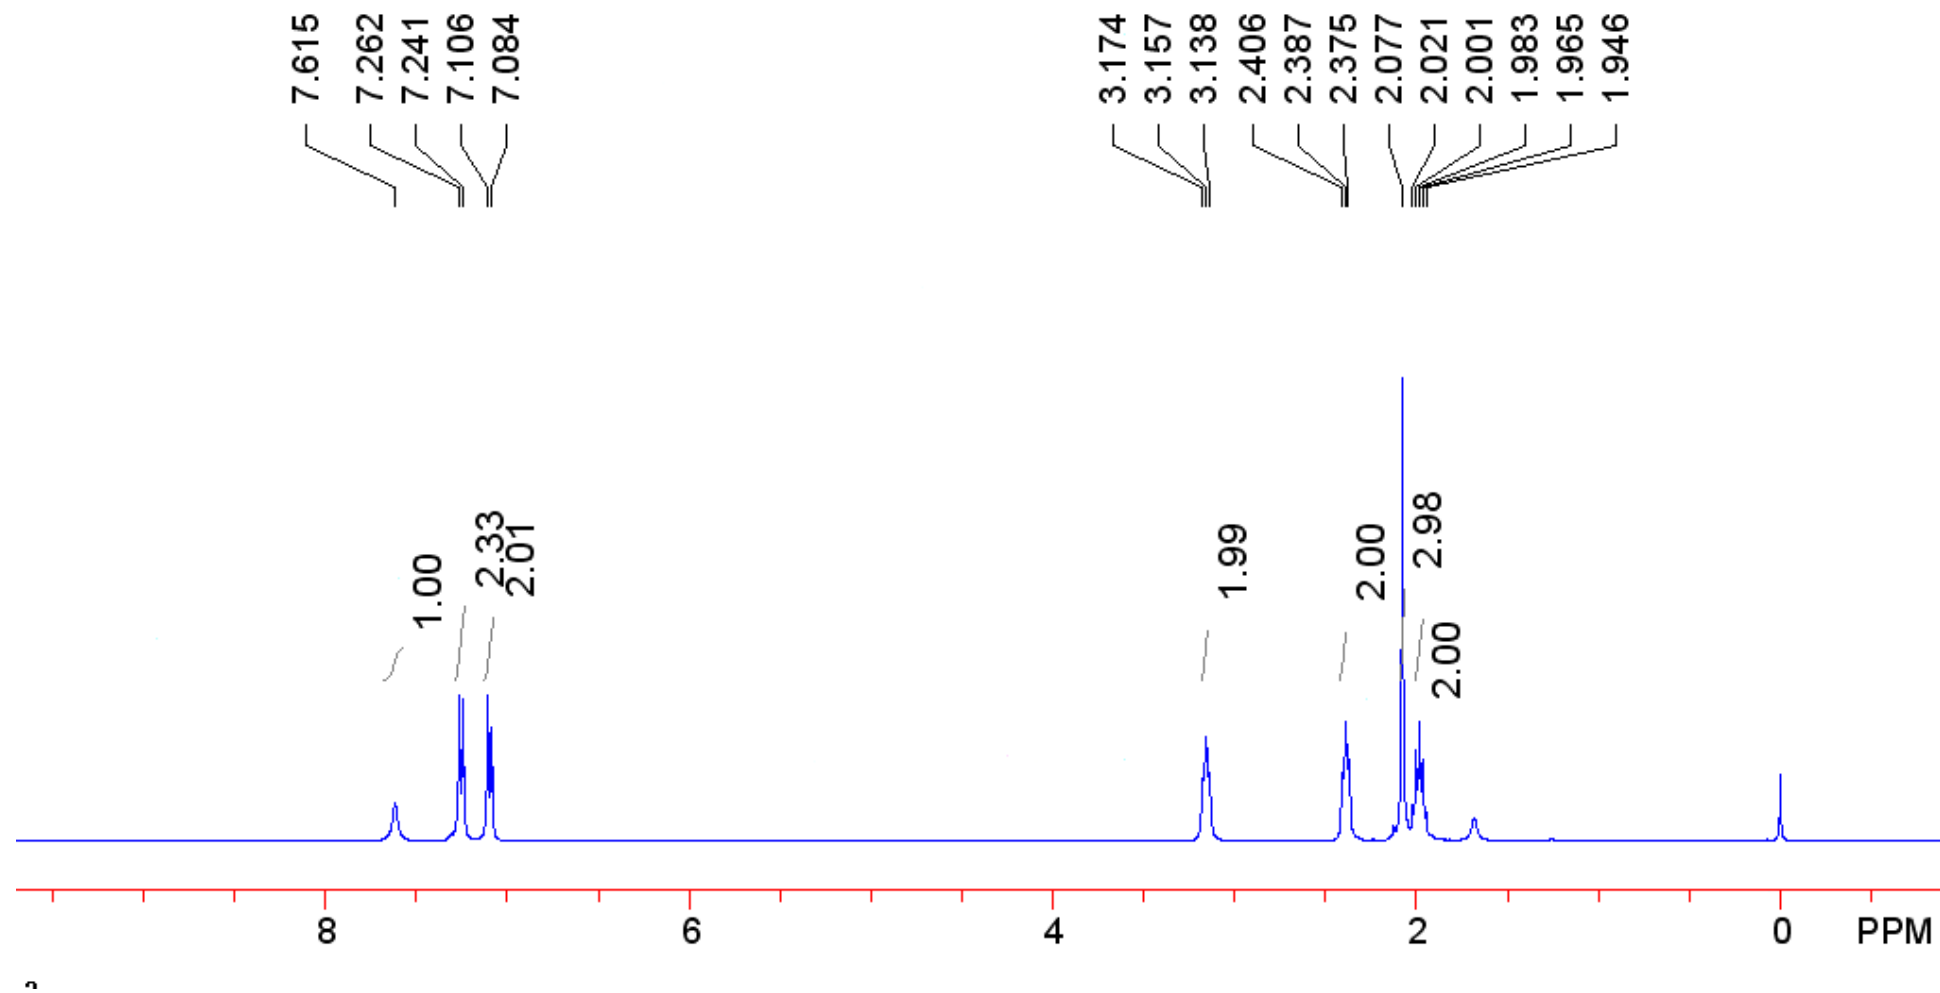

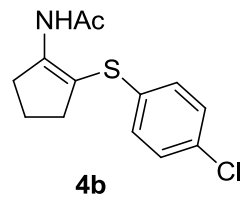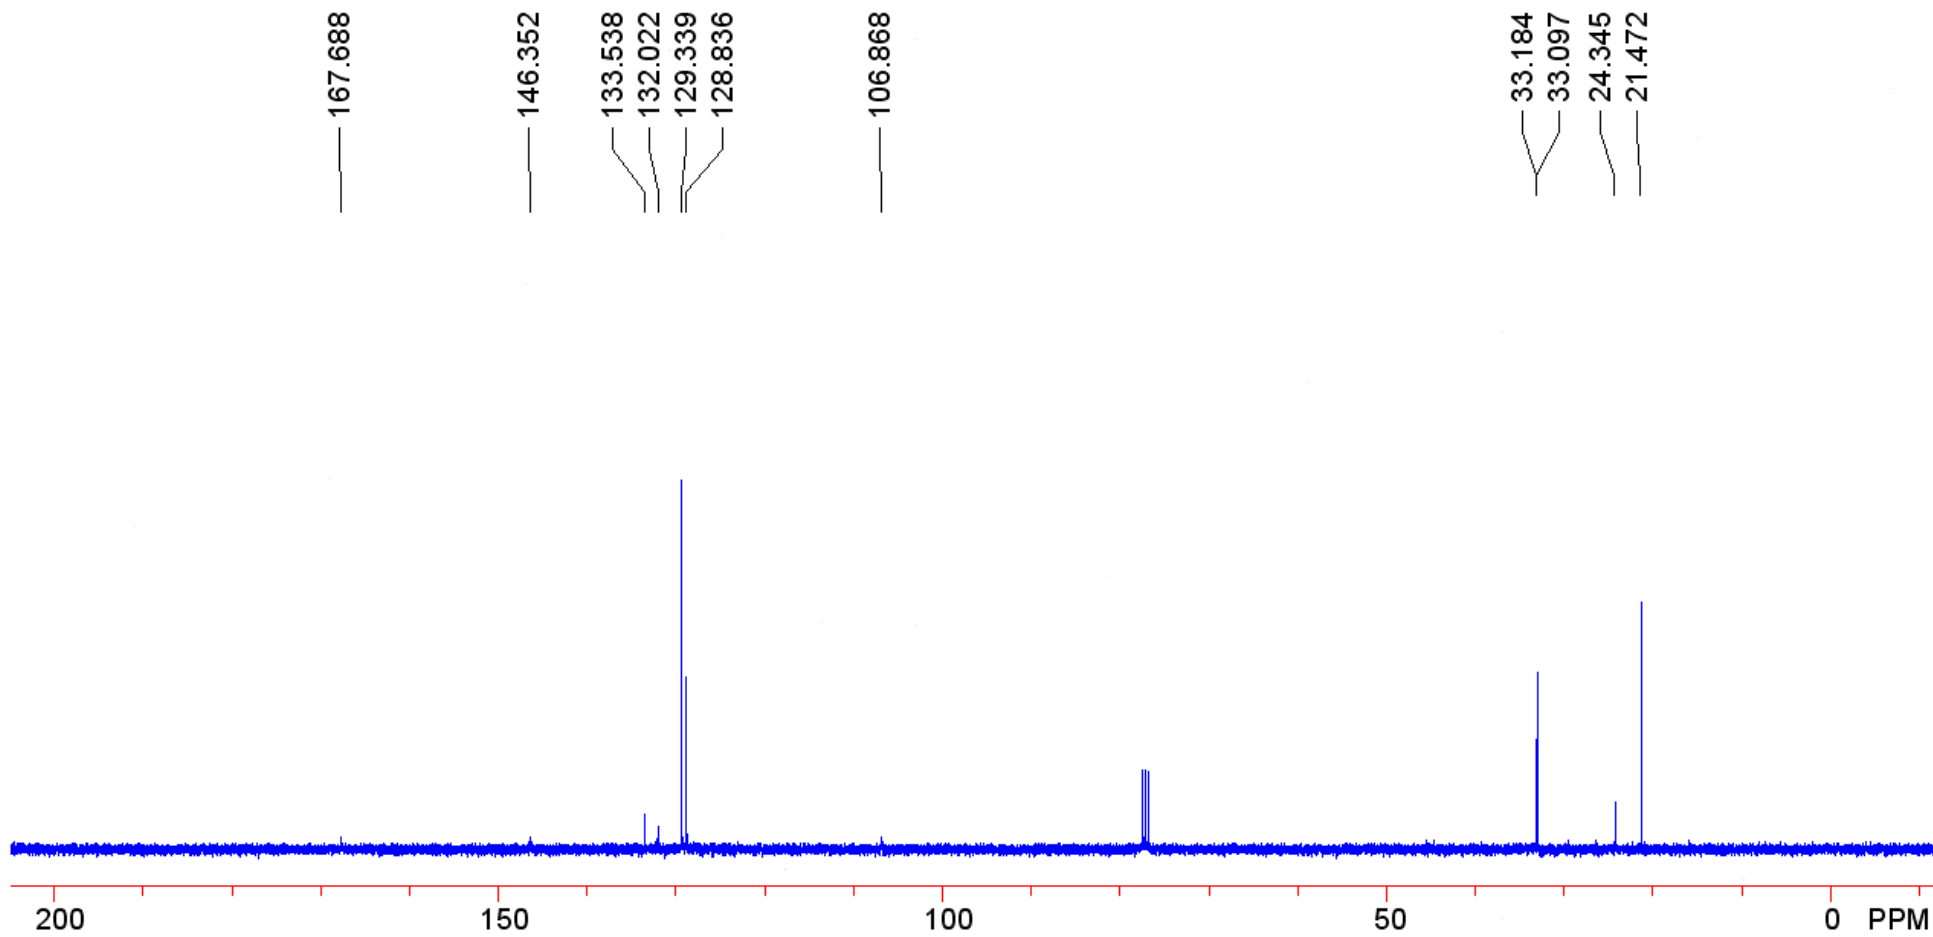

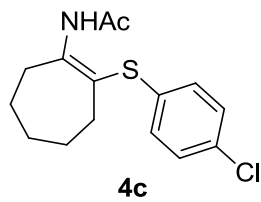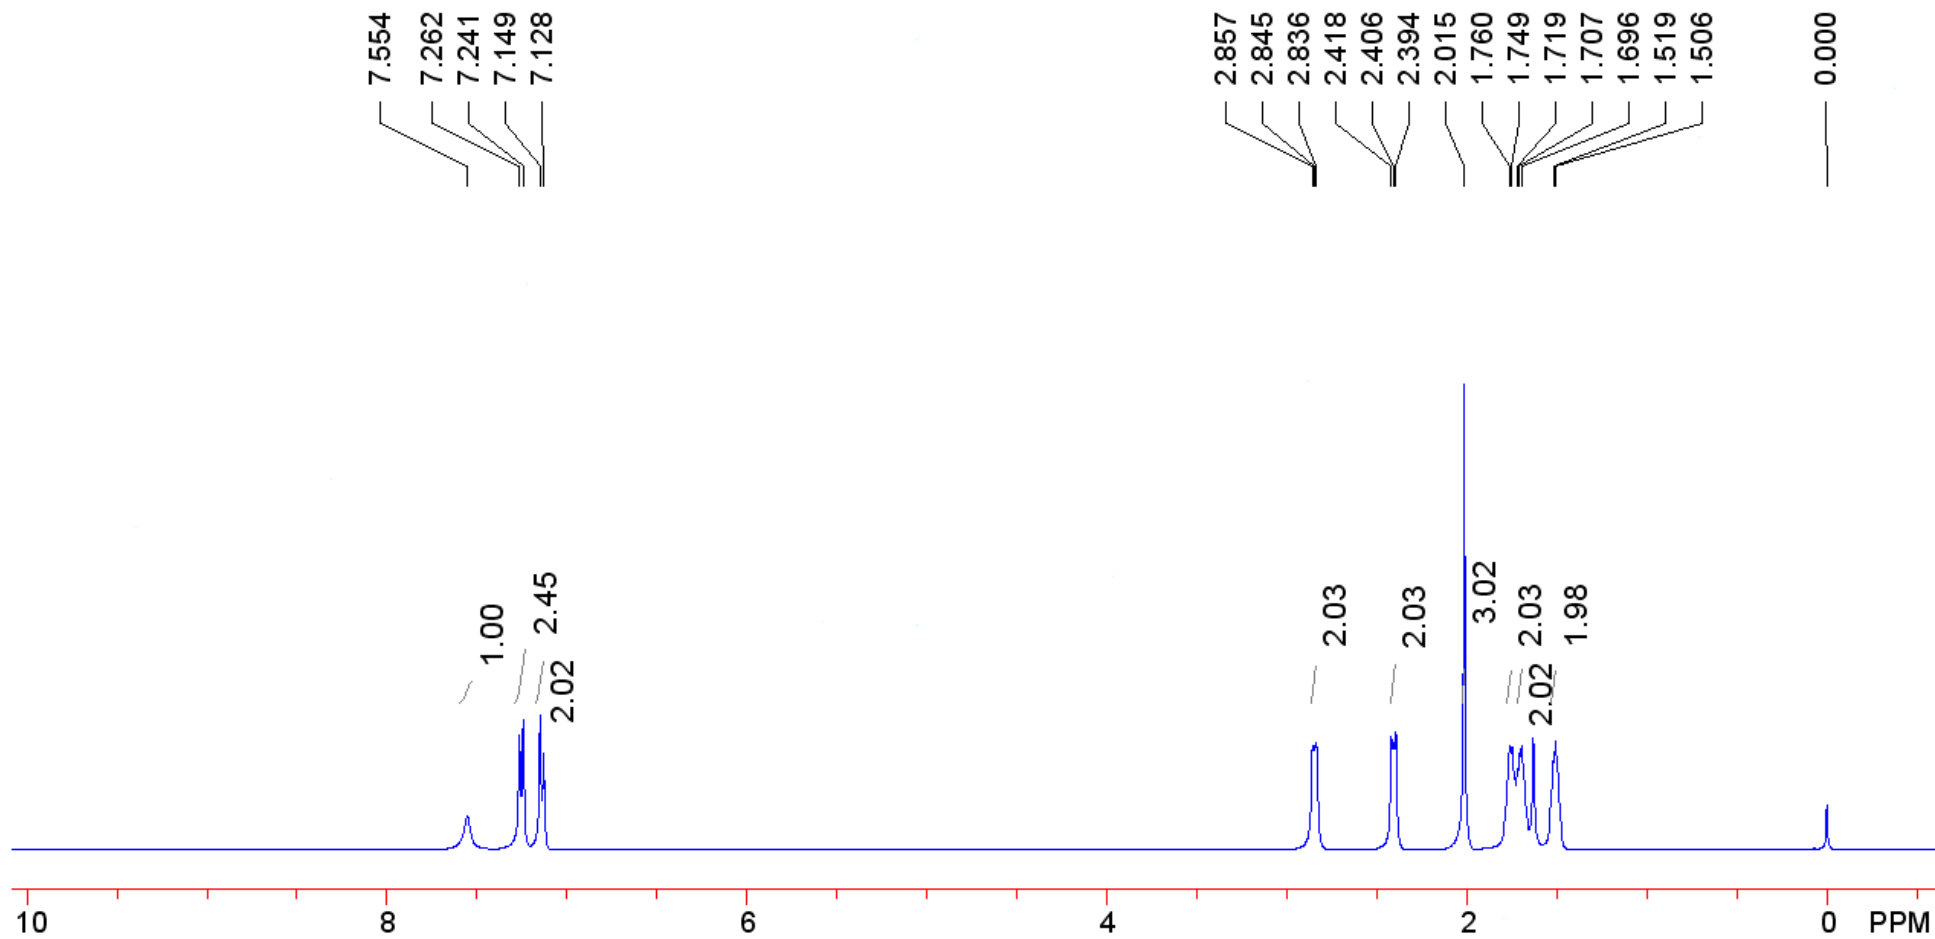

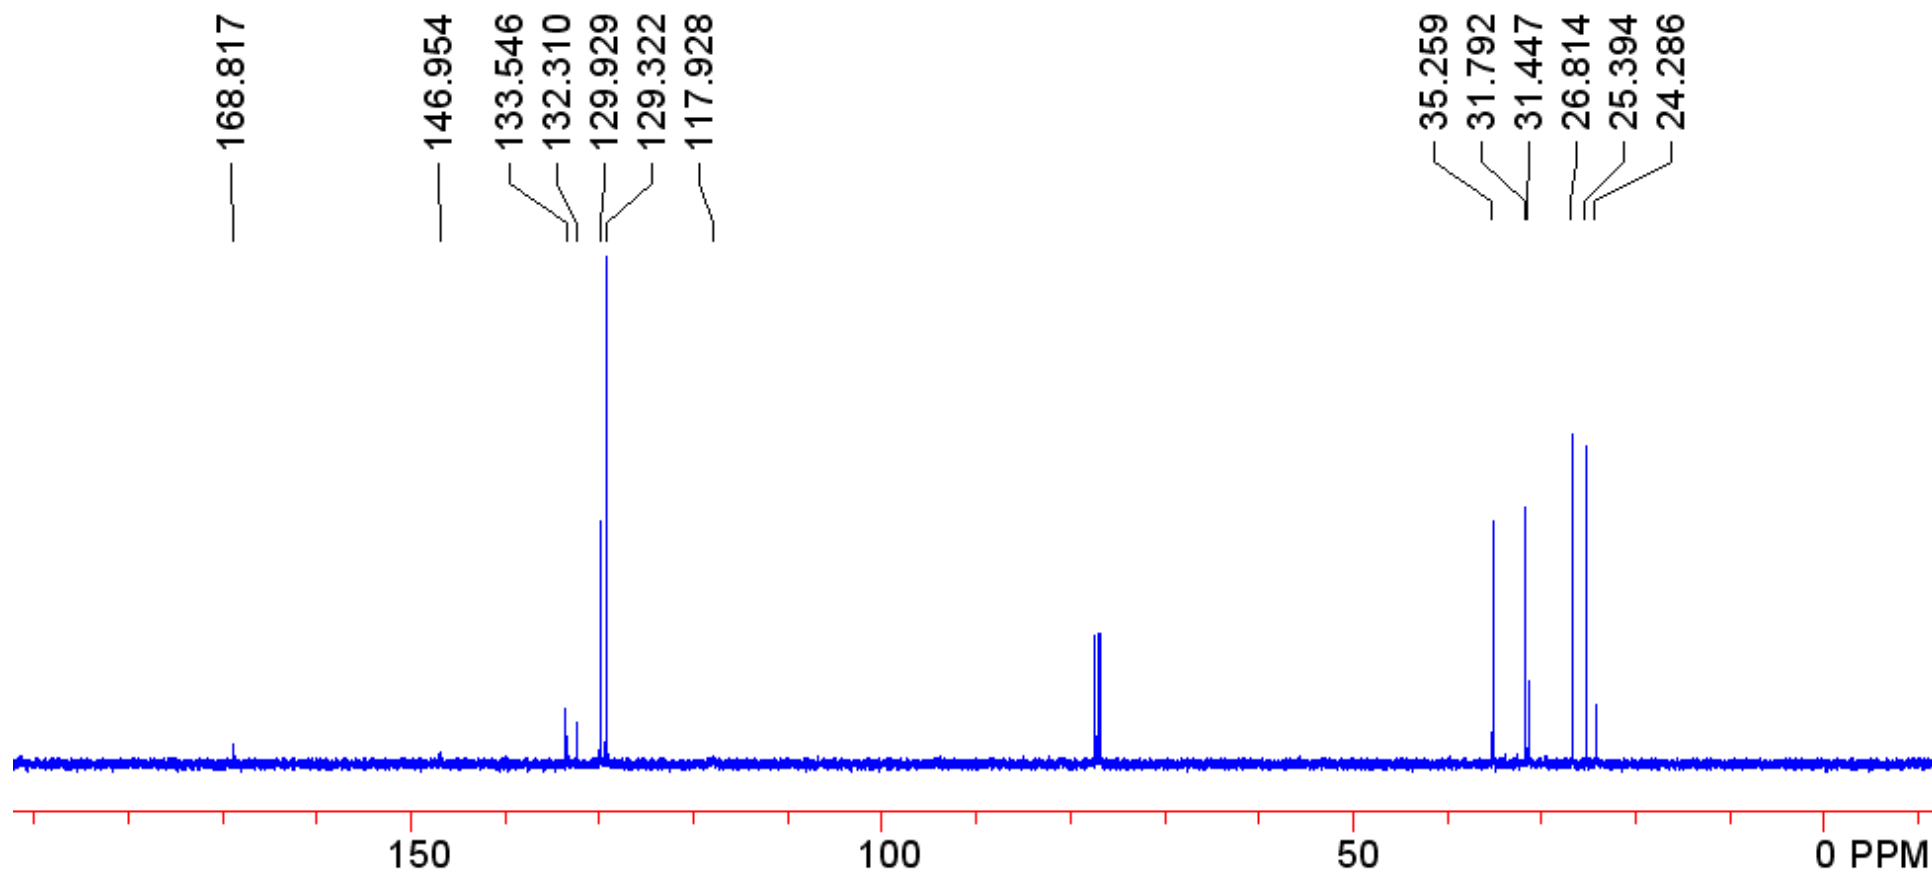



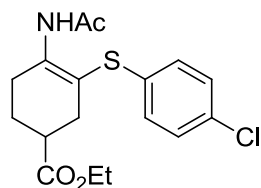

4d

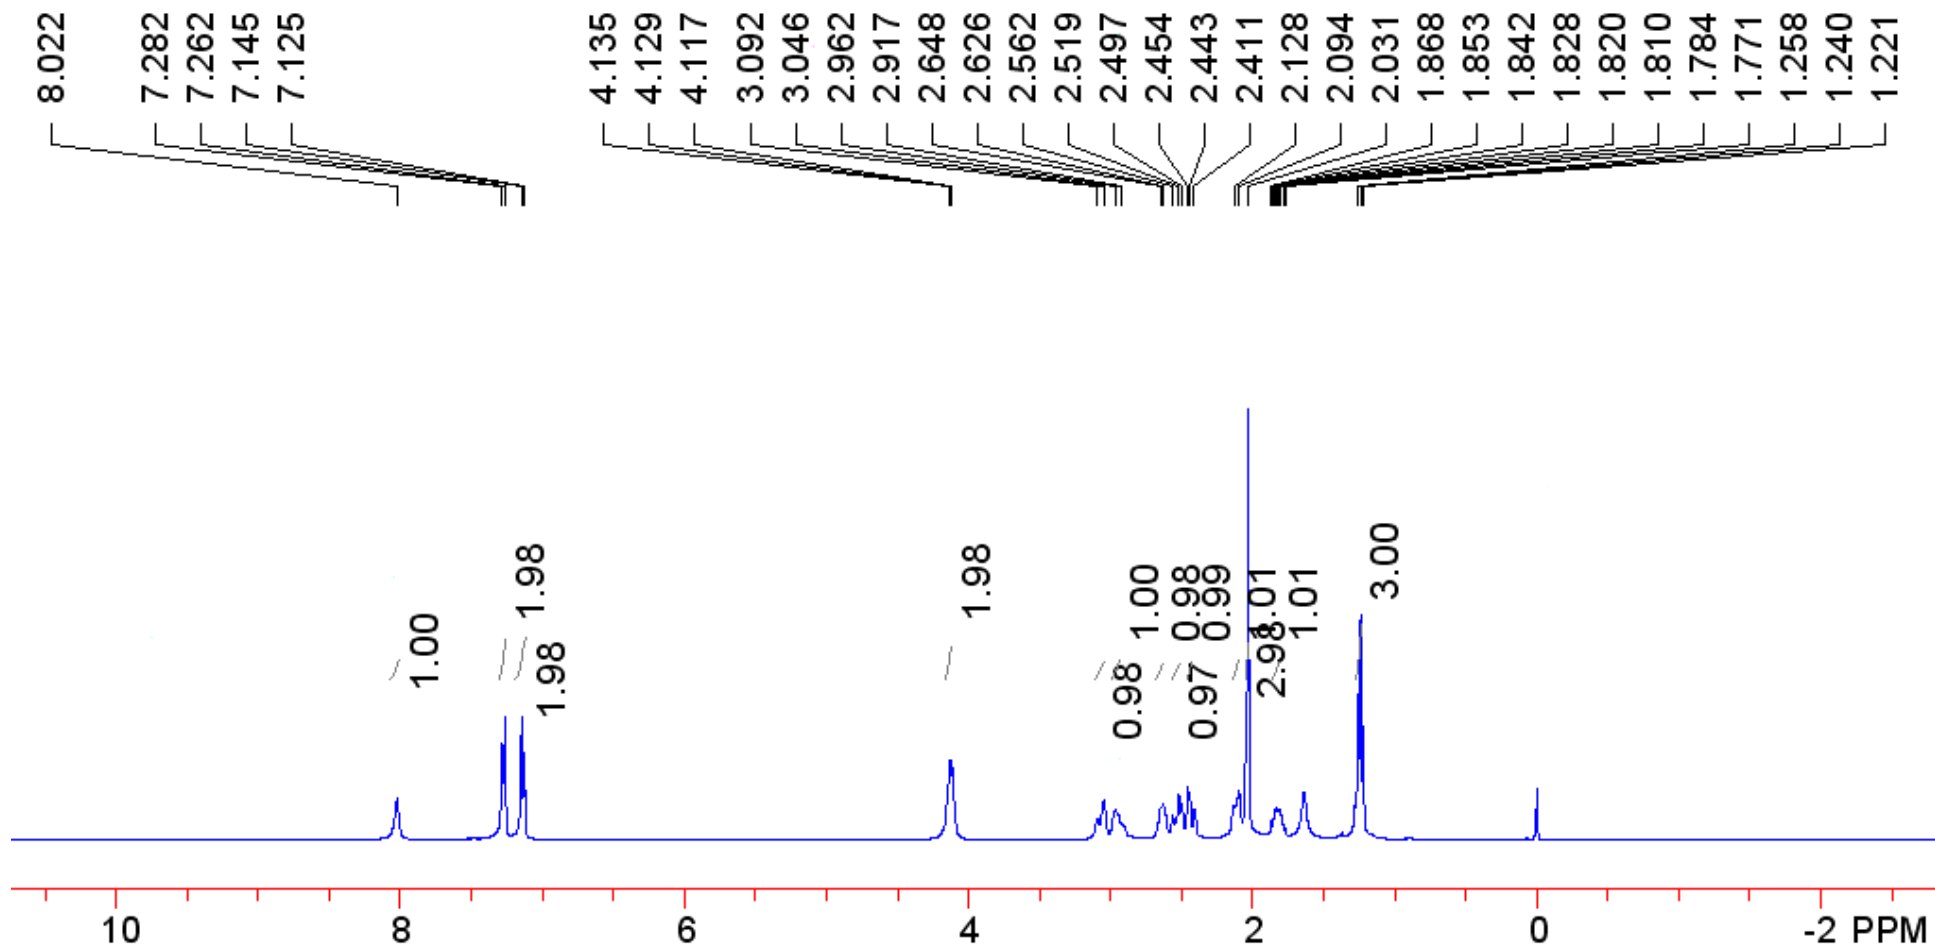

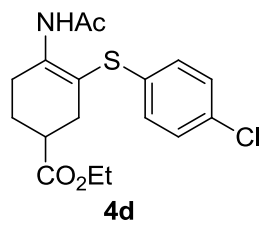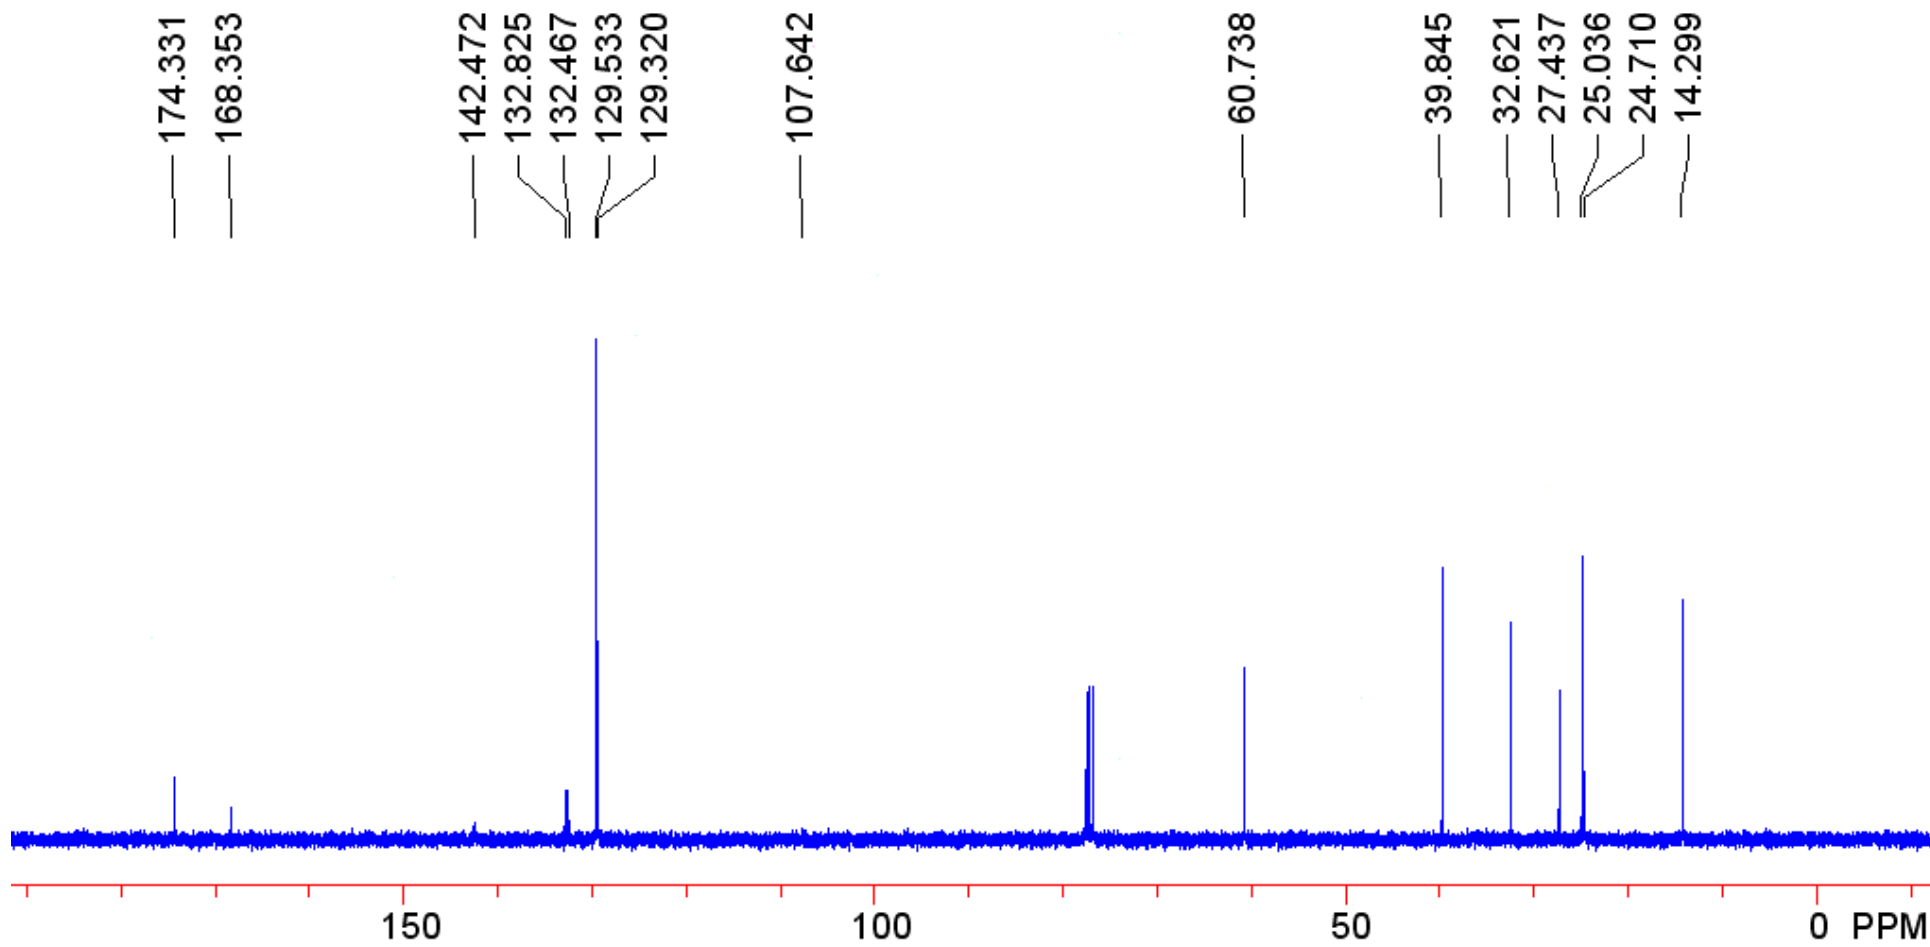

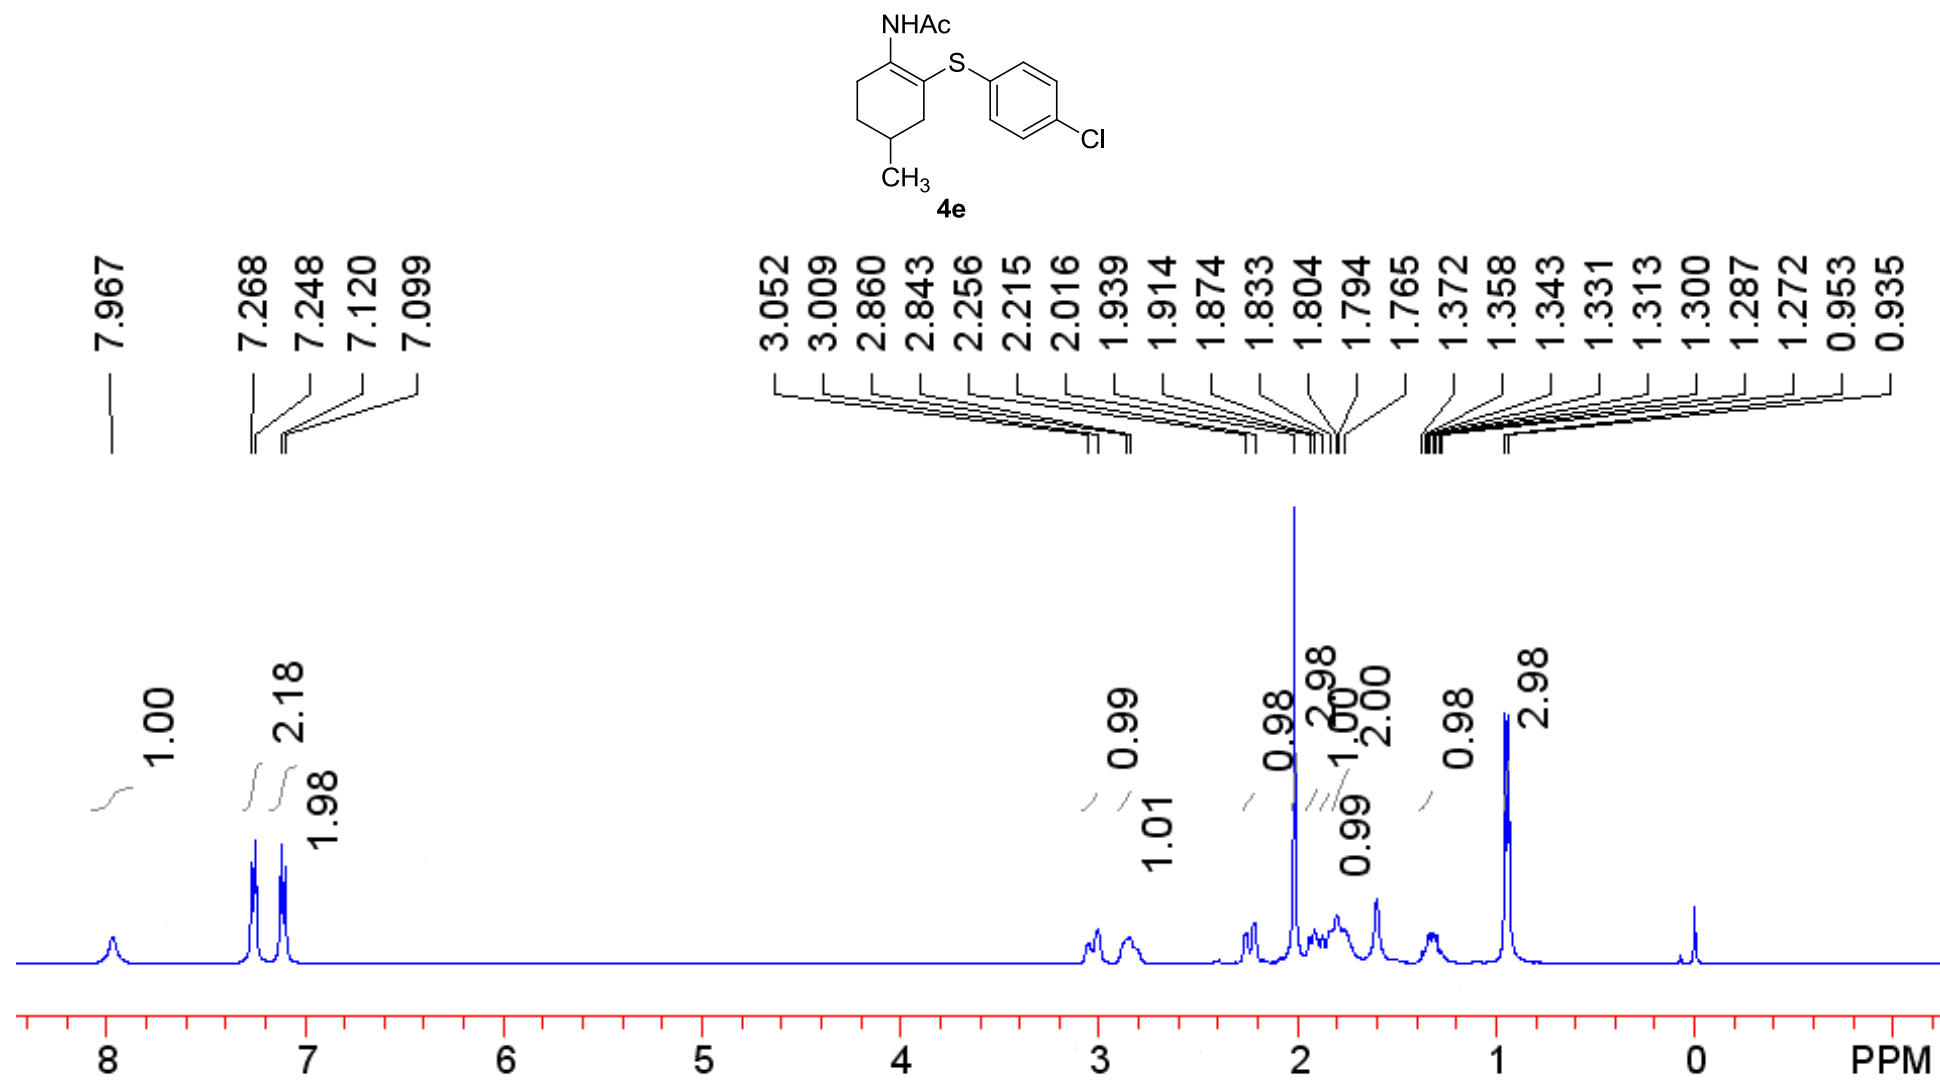

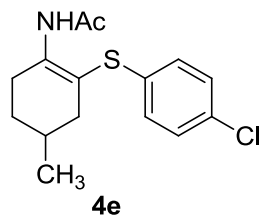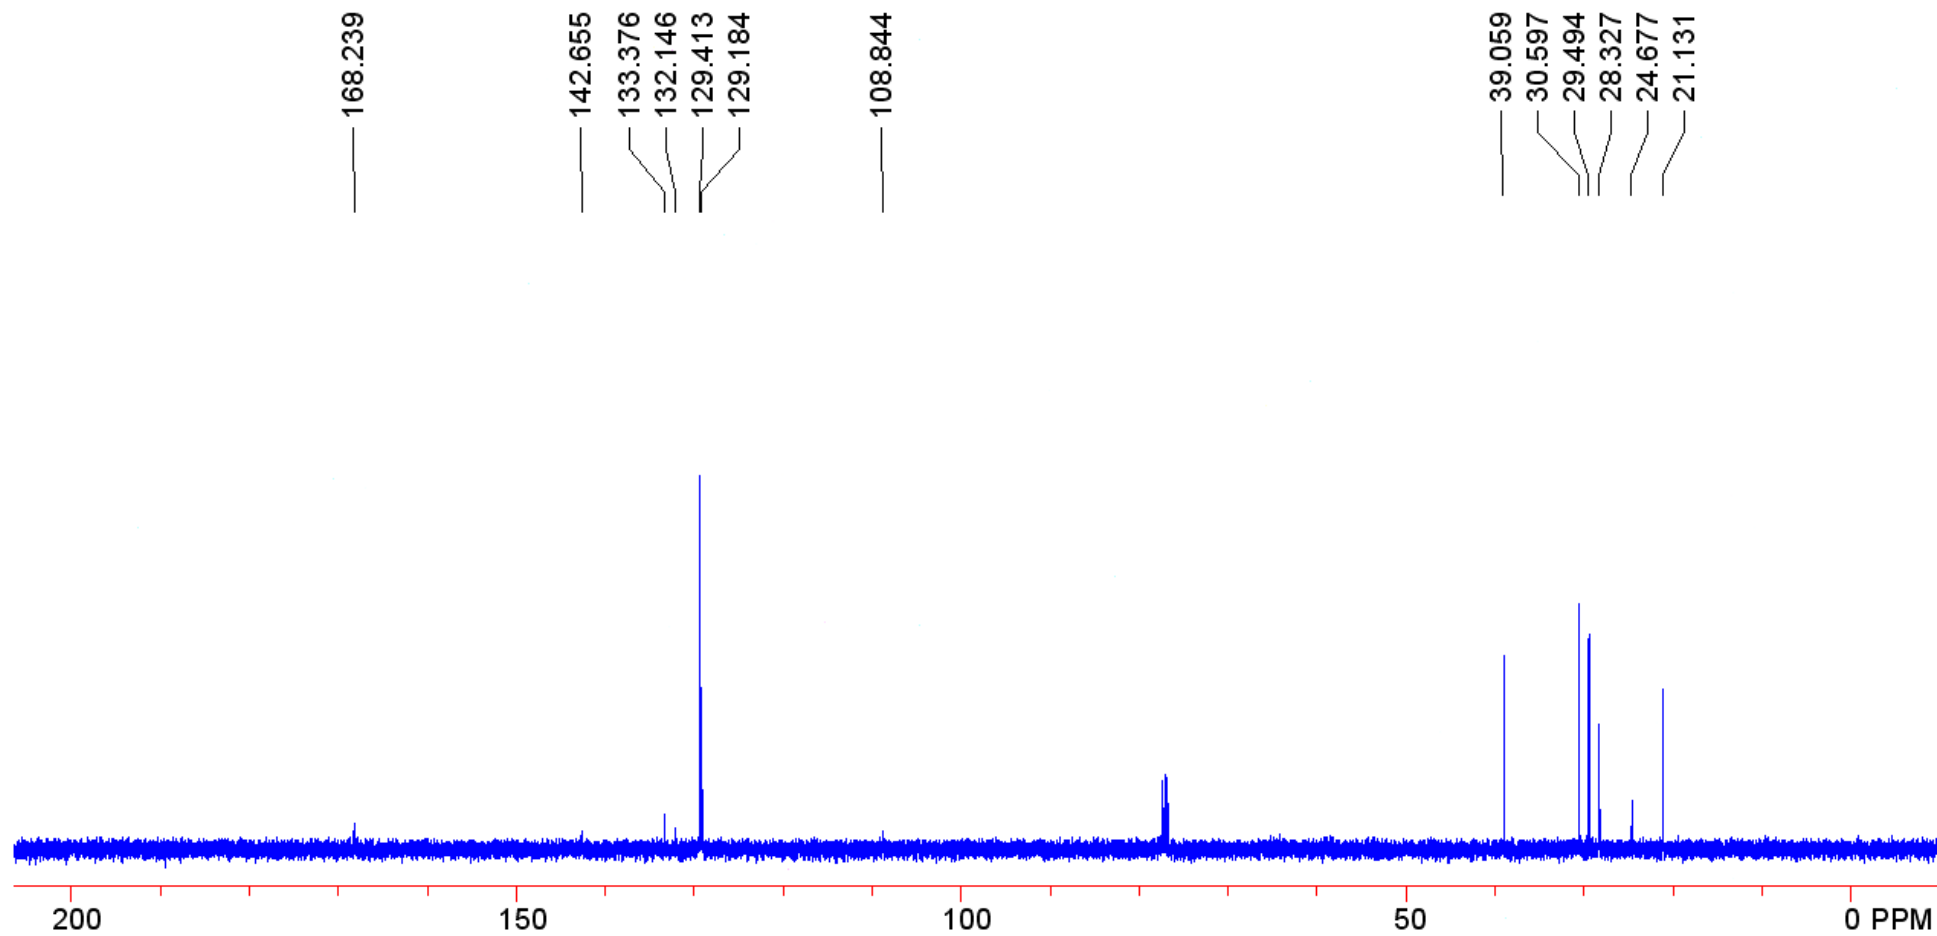

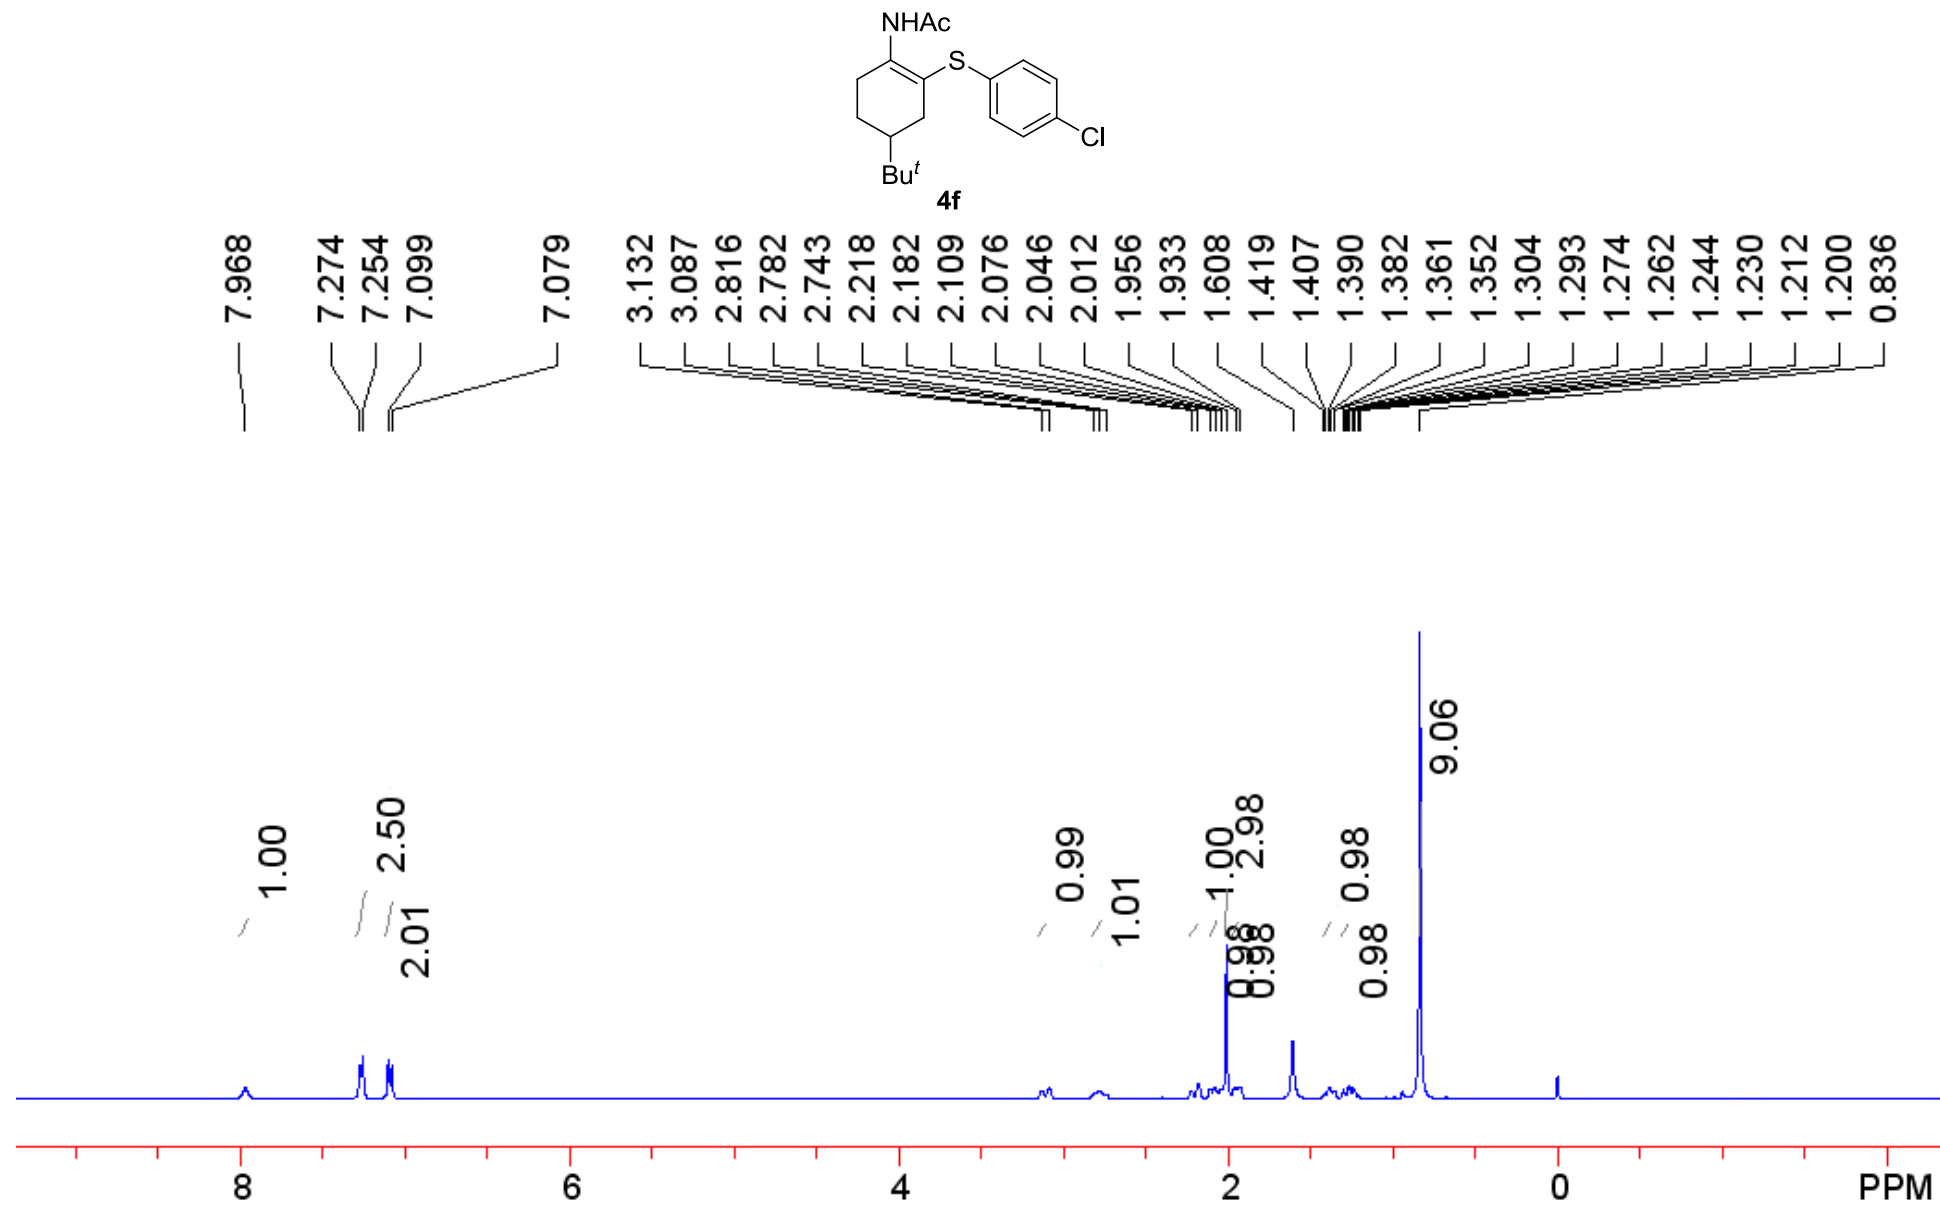

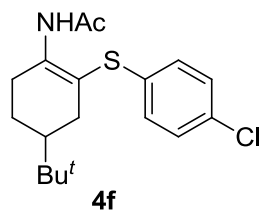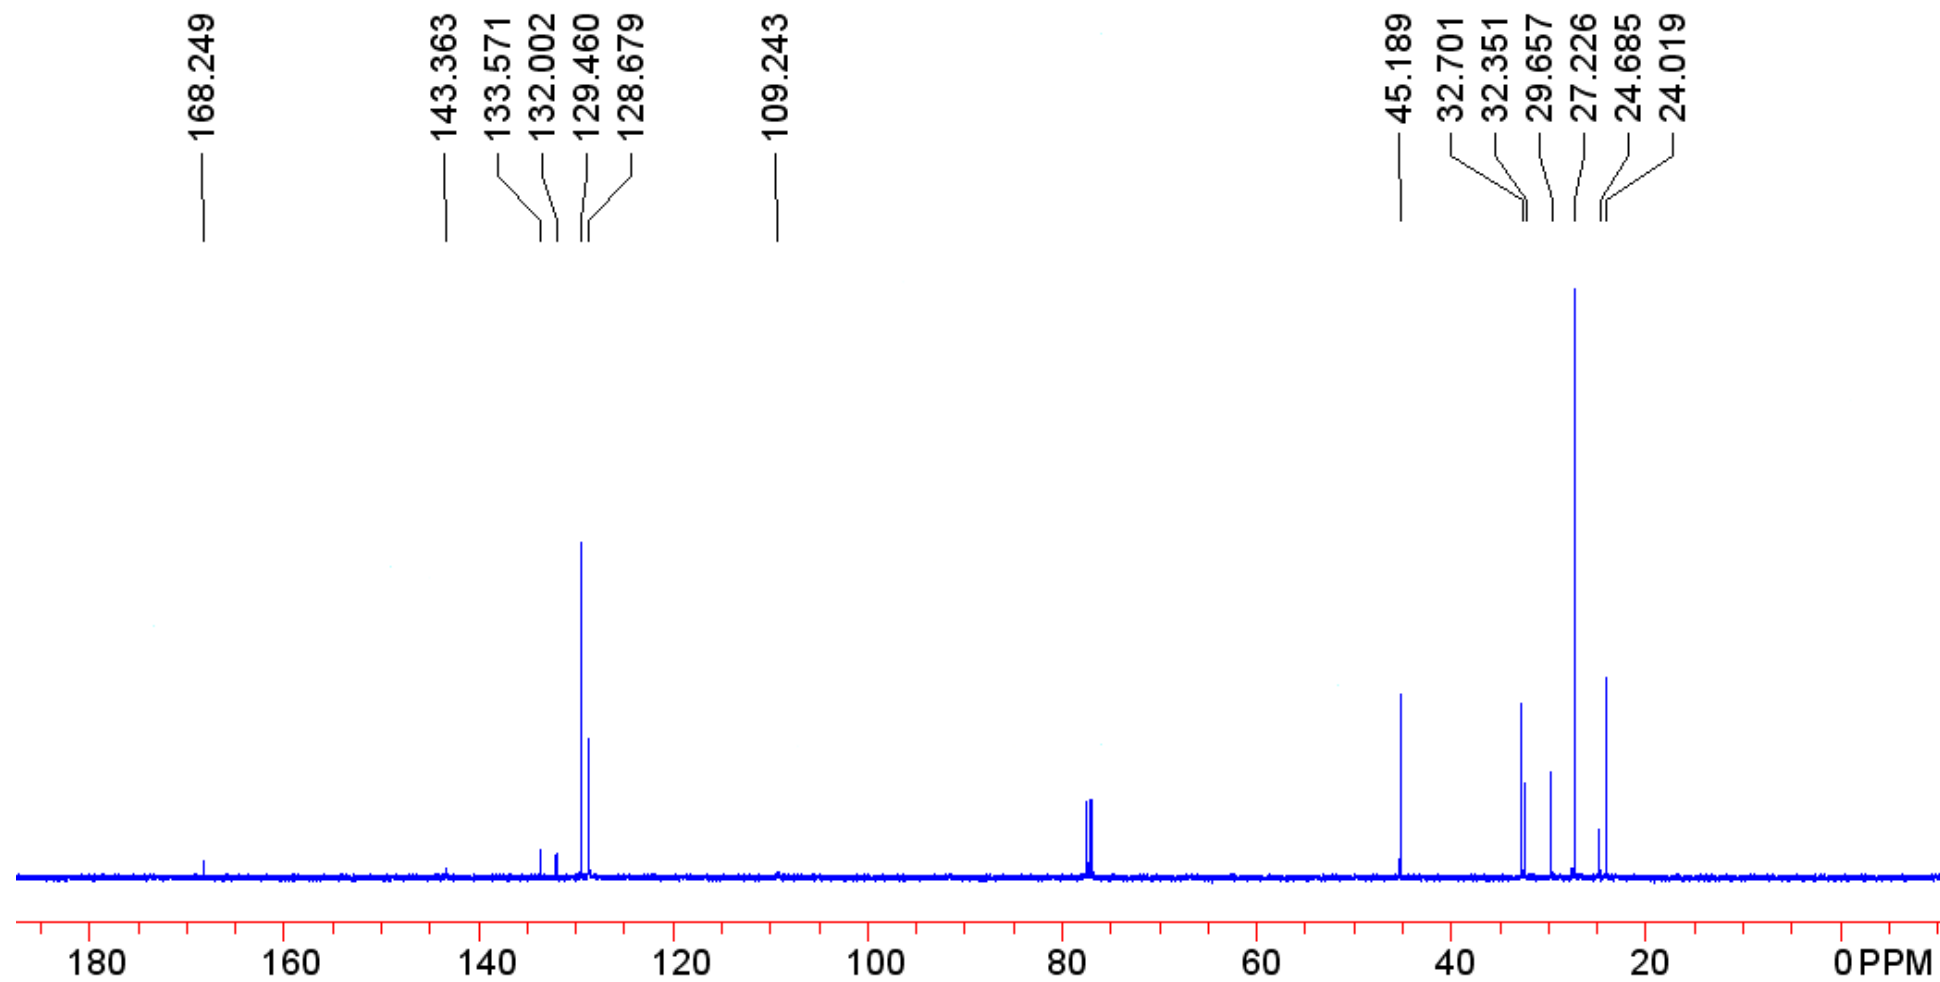

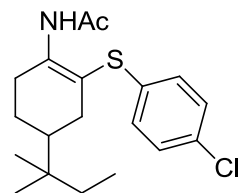

4g

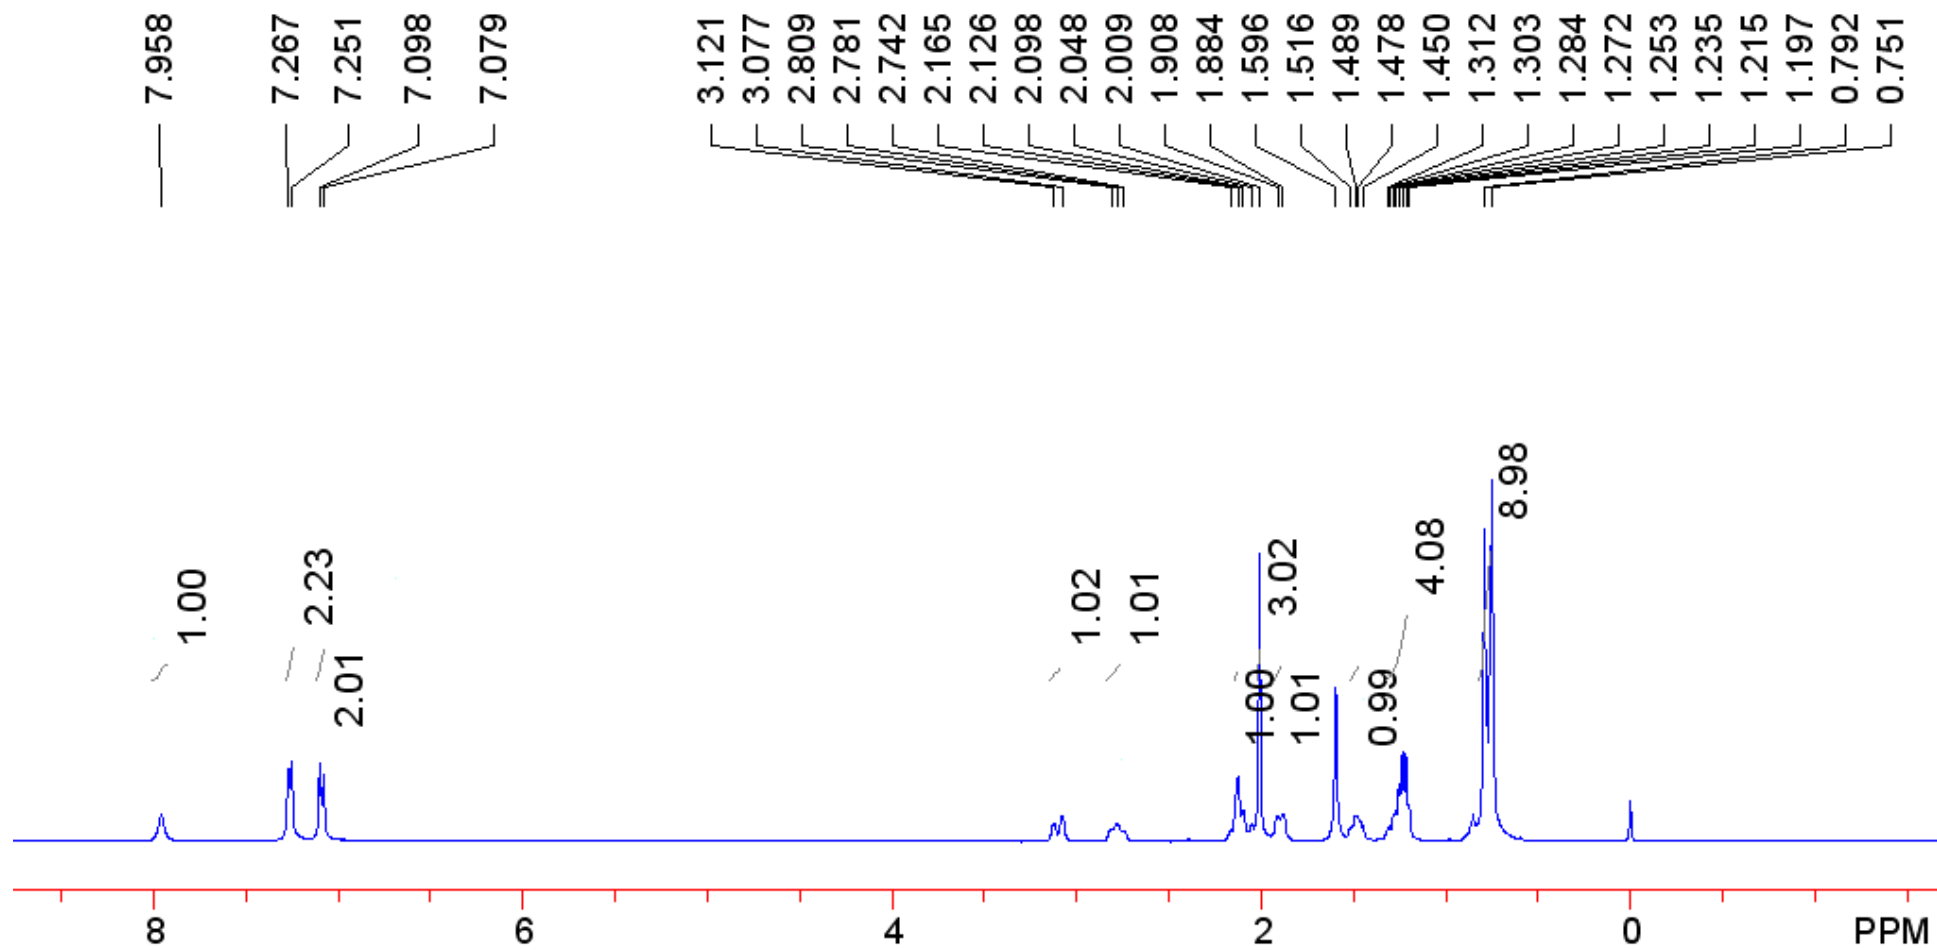

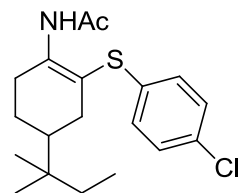

4g

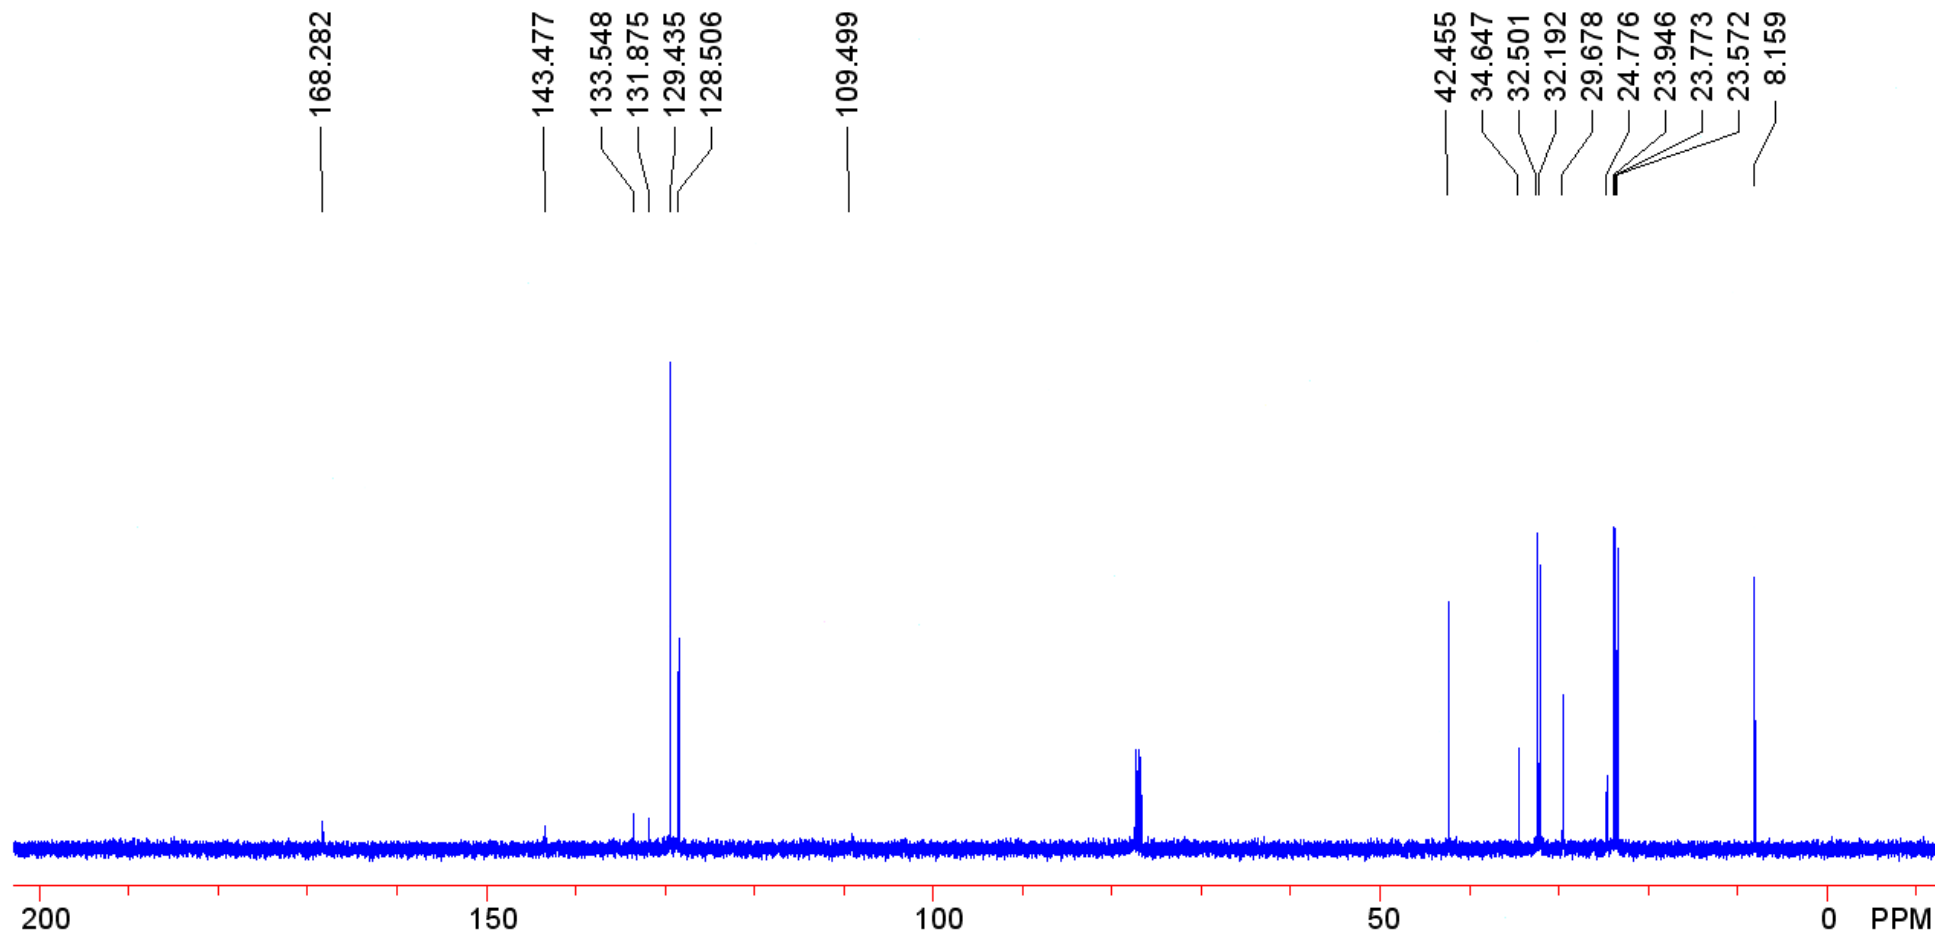



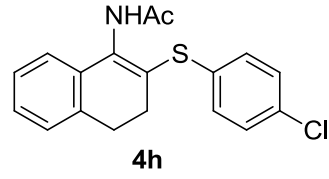

7.337  
7.290  
7.264  
7.188  
7.122  
6.897

2.821  
2.428  
2.216  
1.924

0.000

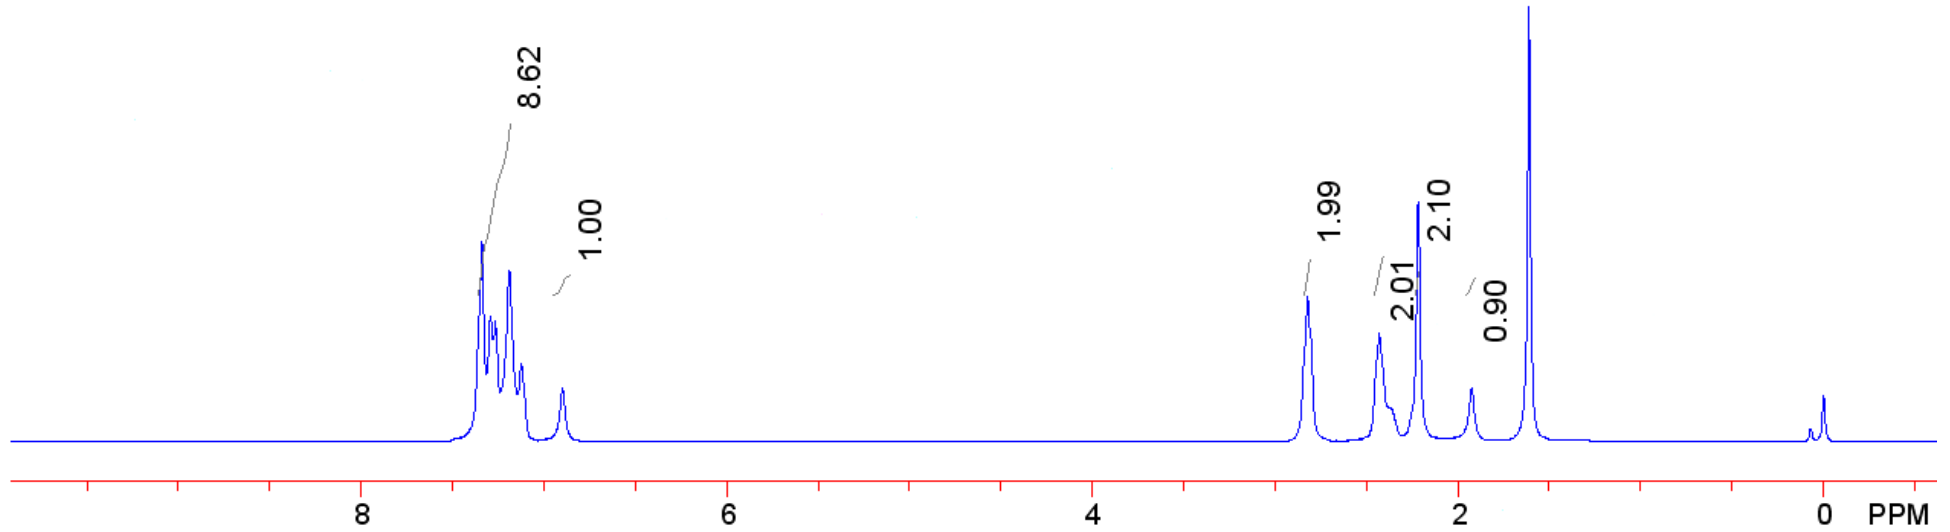



157.953

135.390  
134.503  
132.794  
132.766  
129.517  
128.059  
127.675  
126.785  
126.742  
123.176  
123.107

28.956  
28.773  
23.358

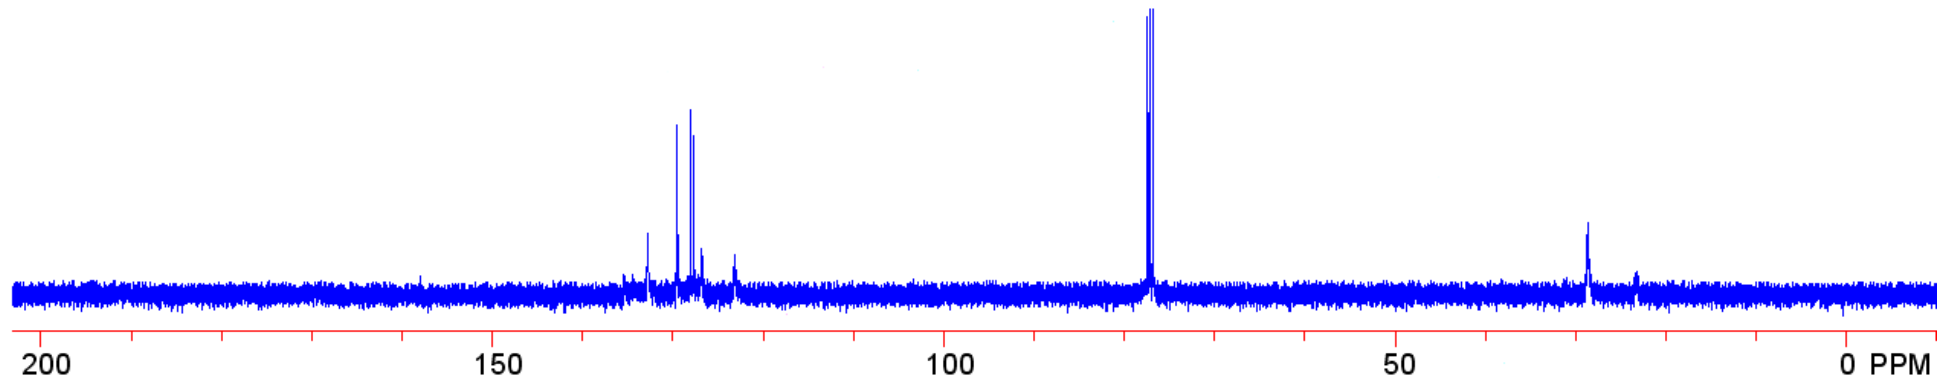

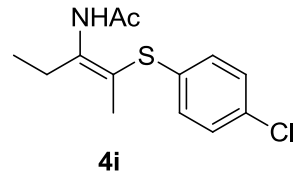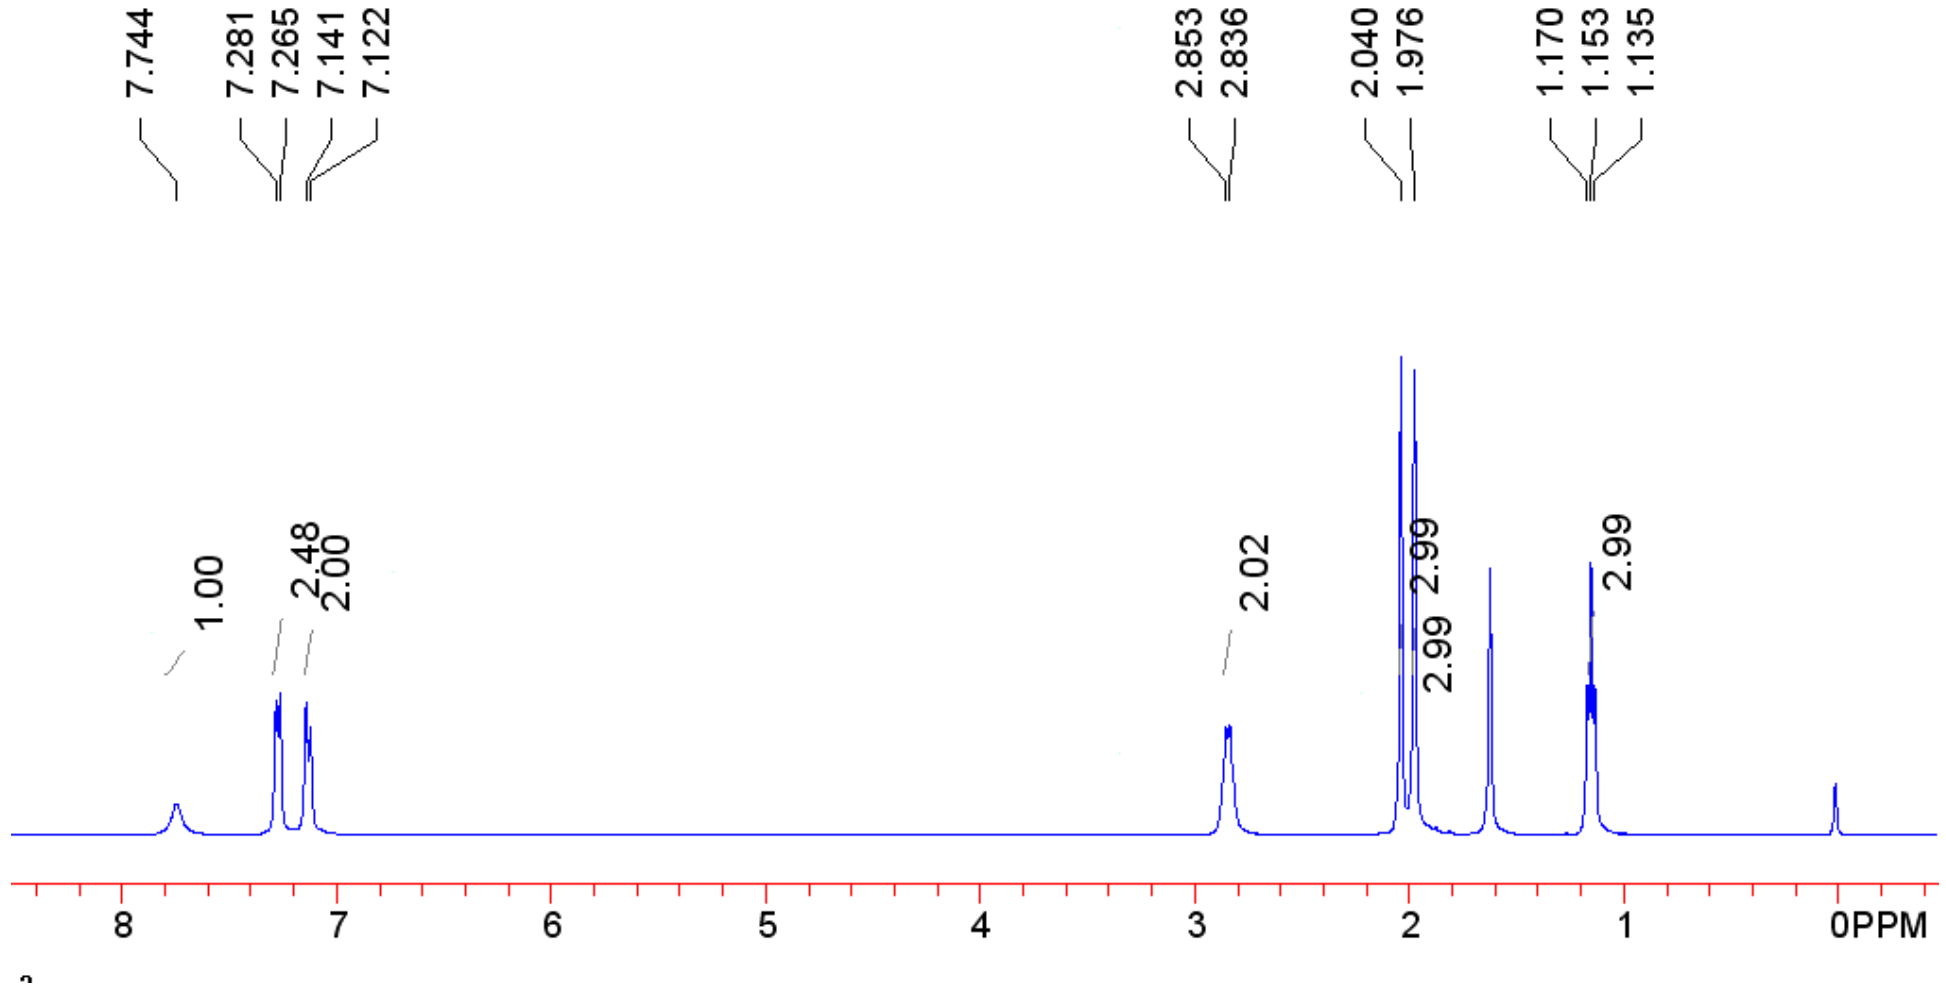

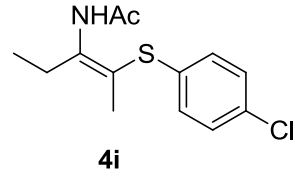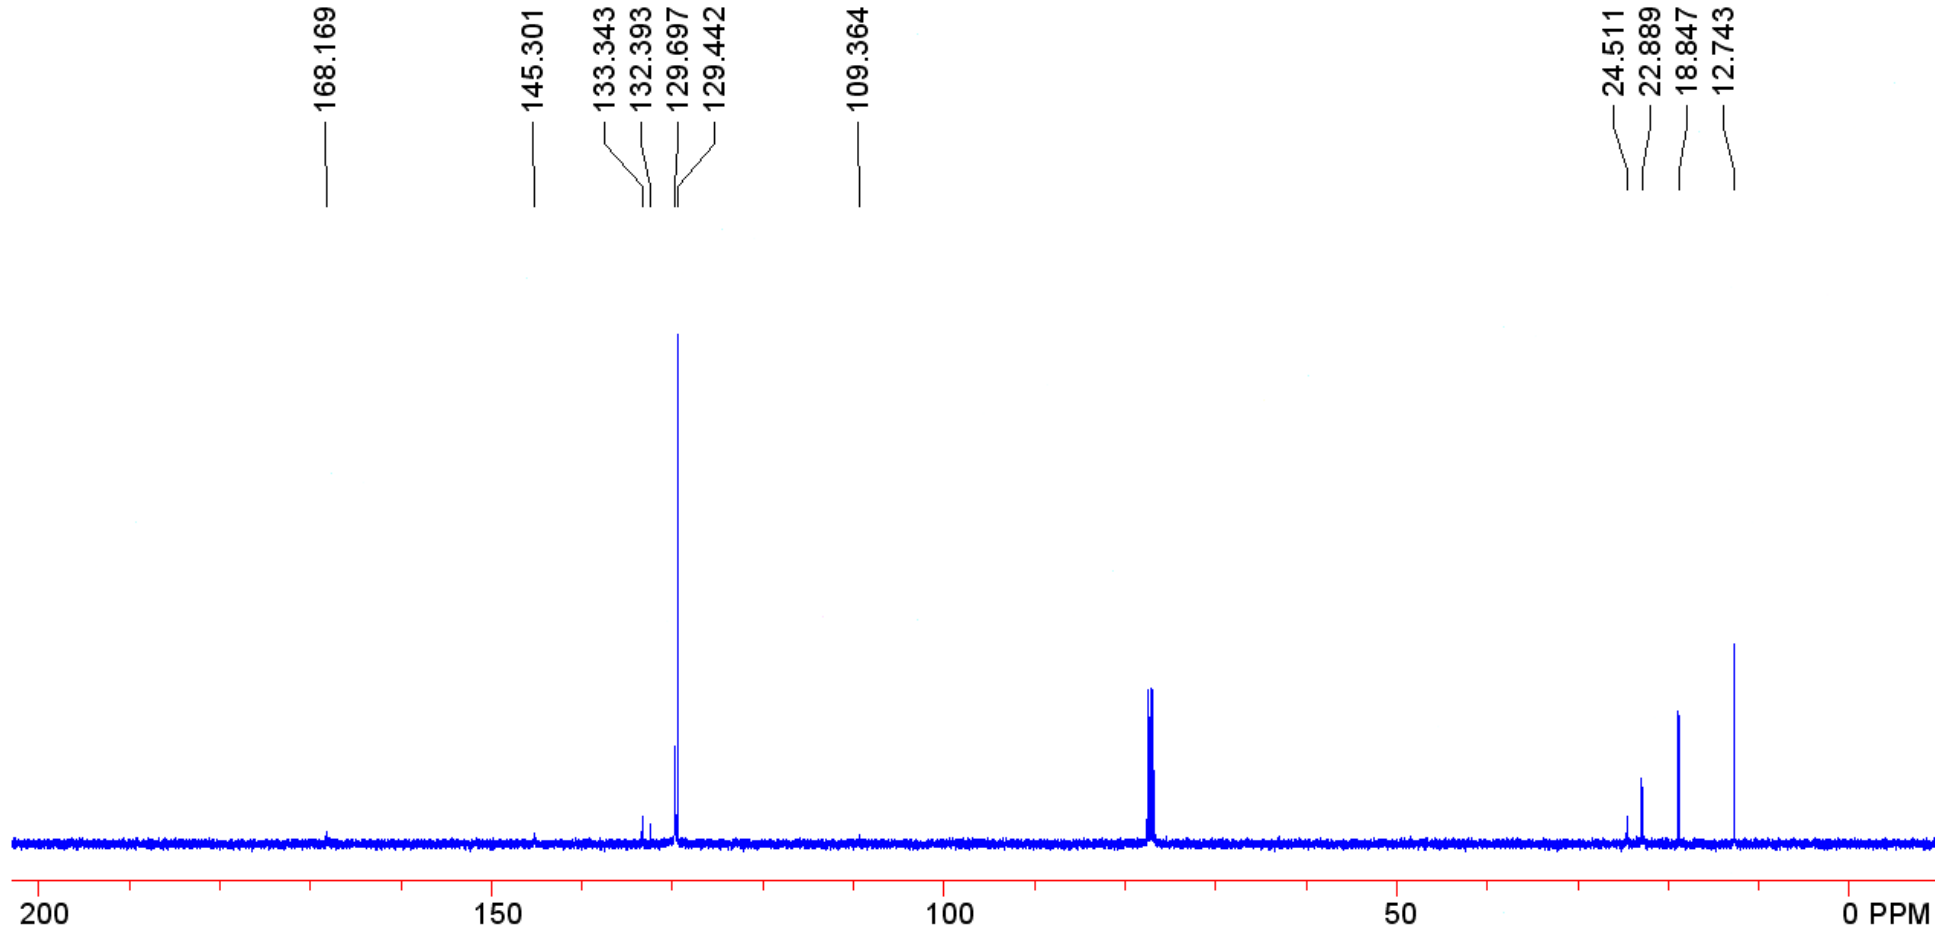

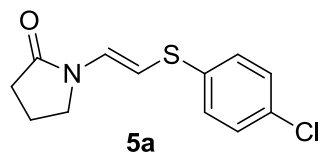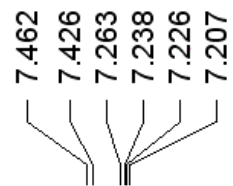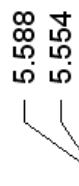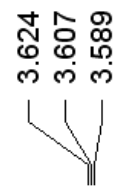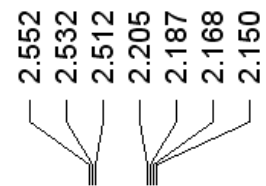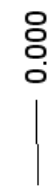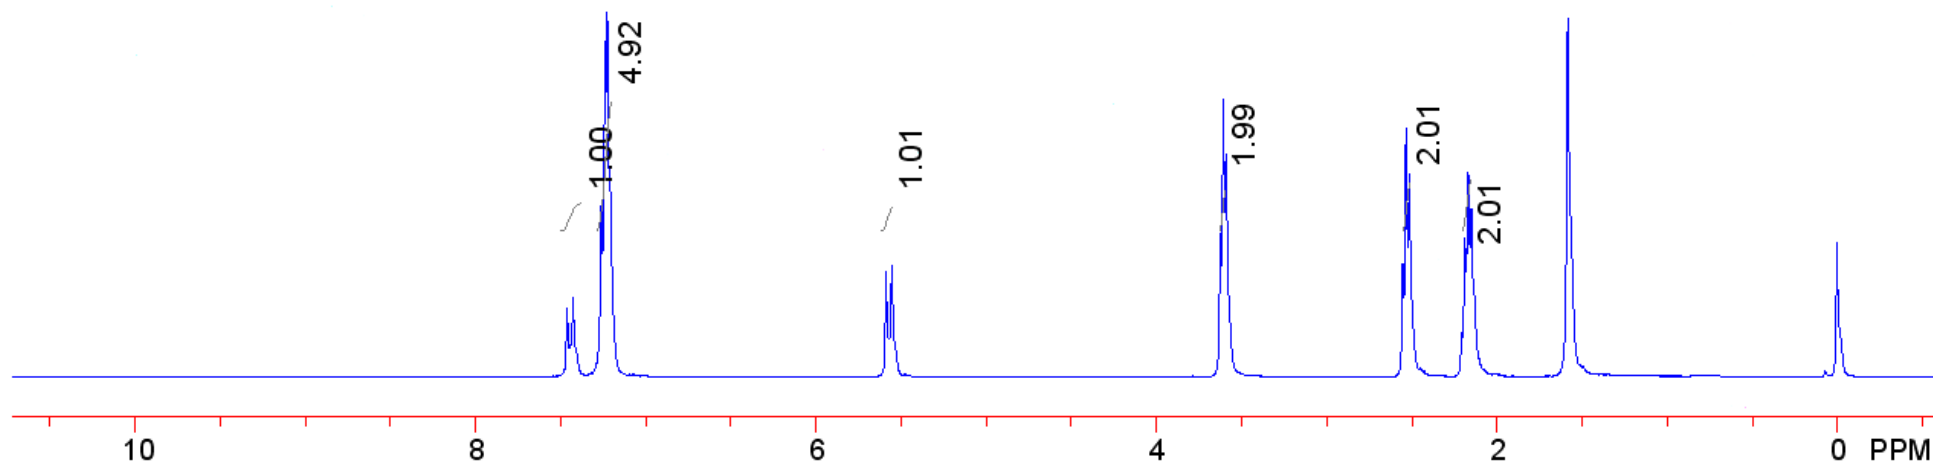

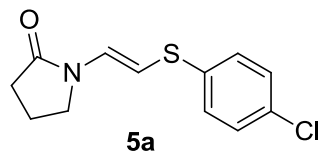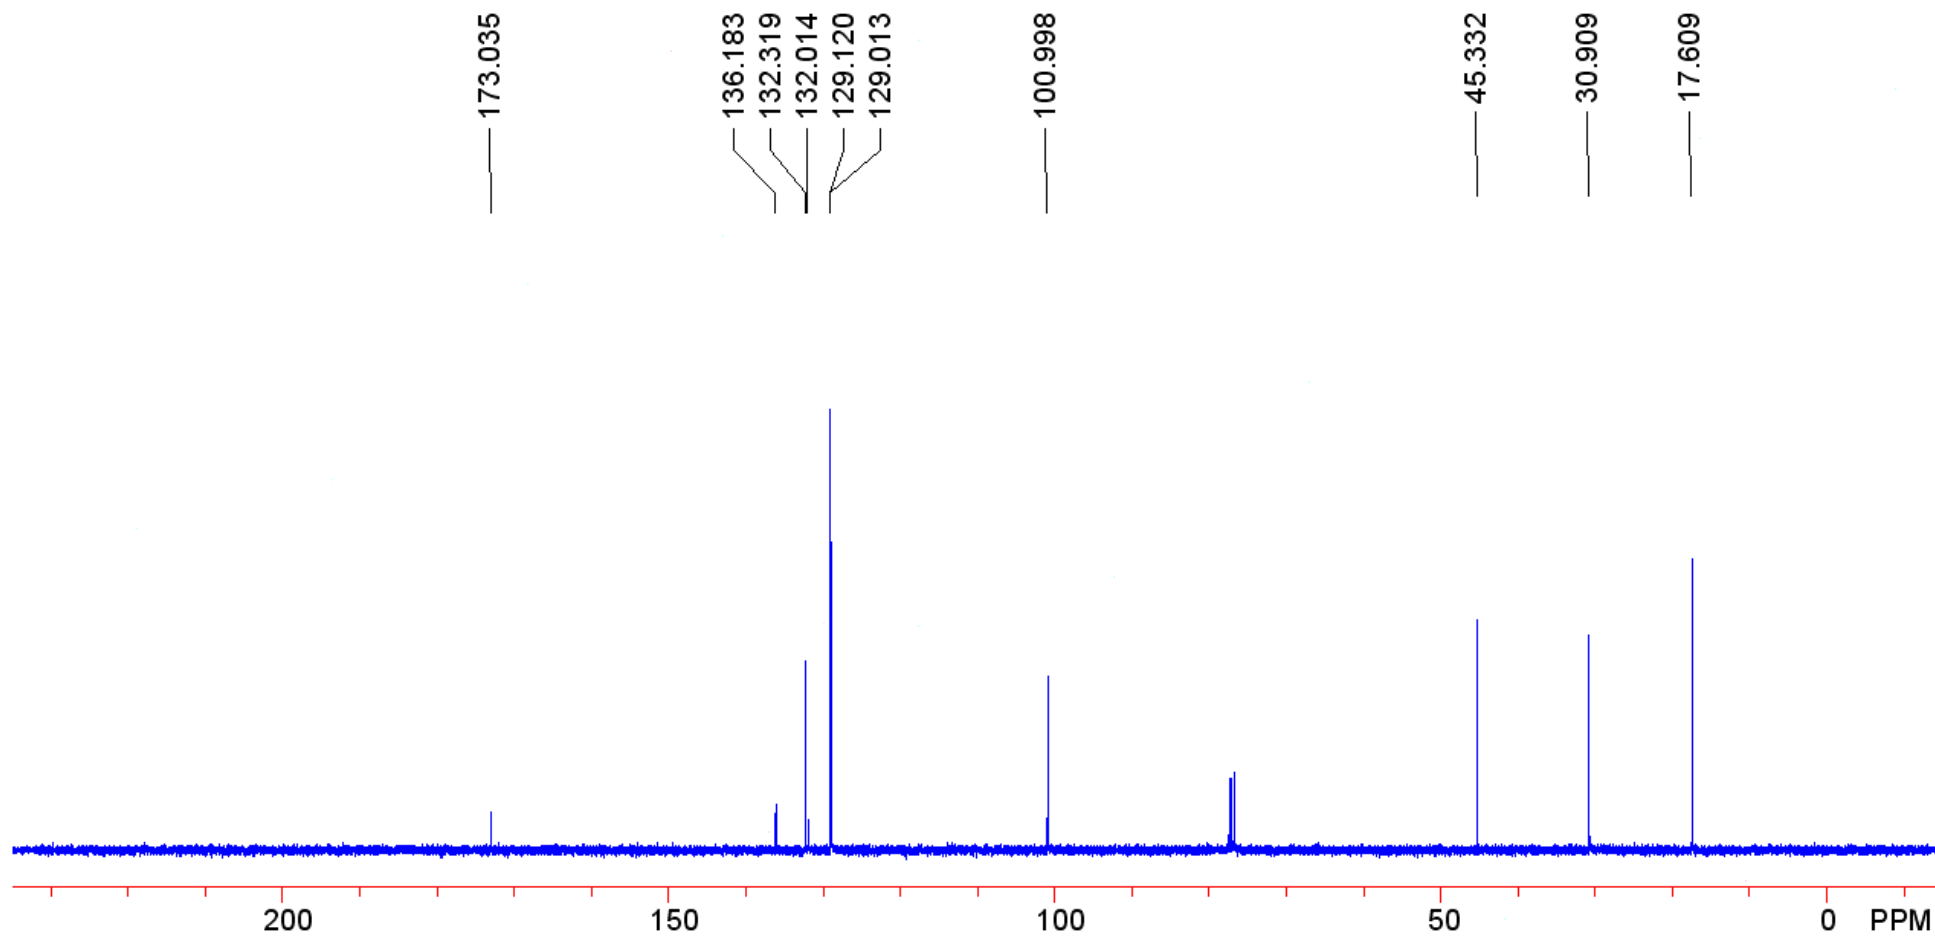

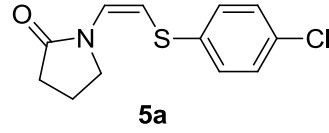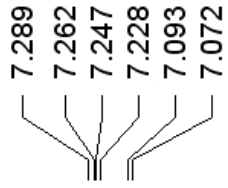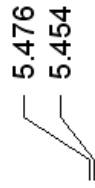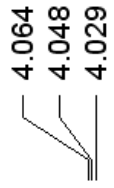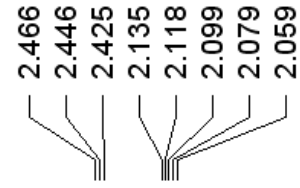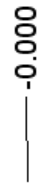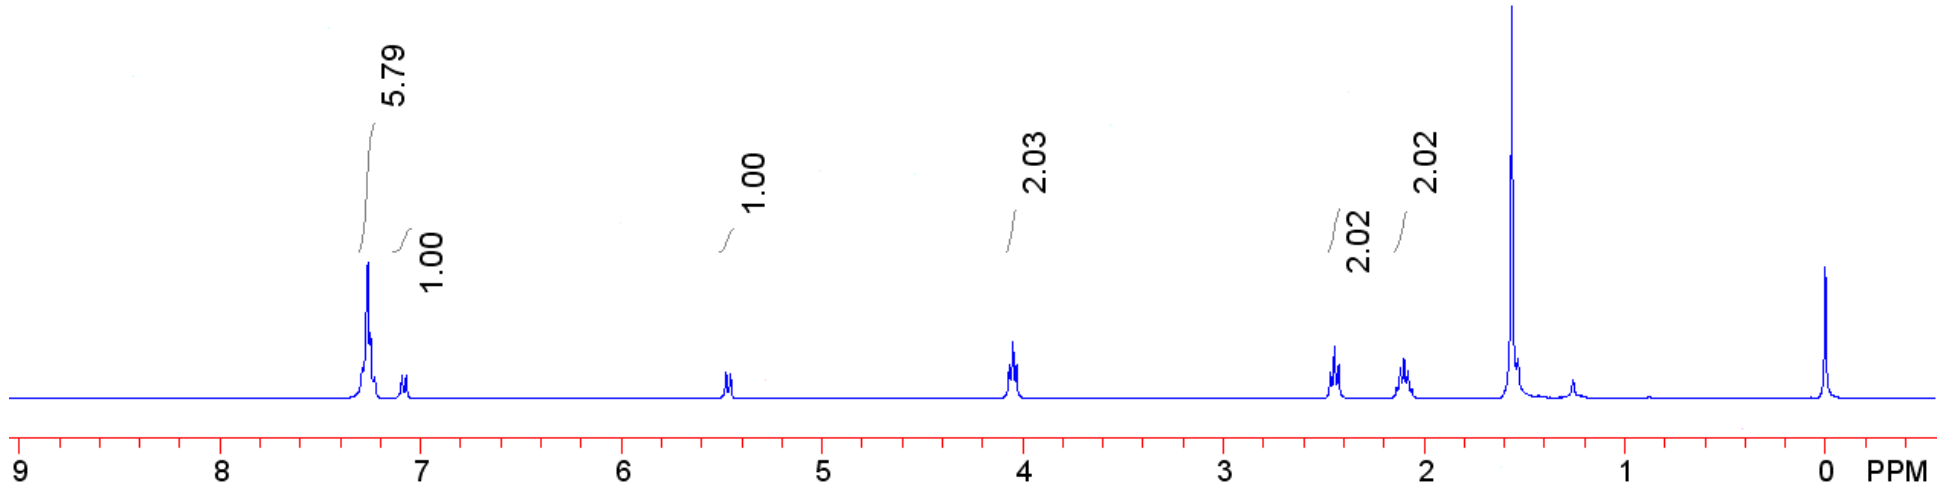

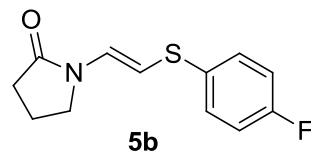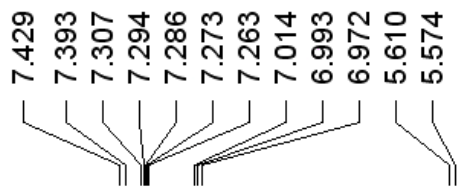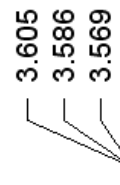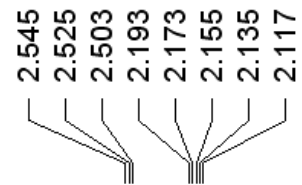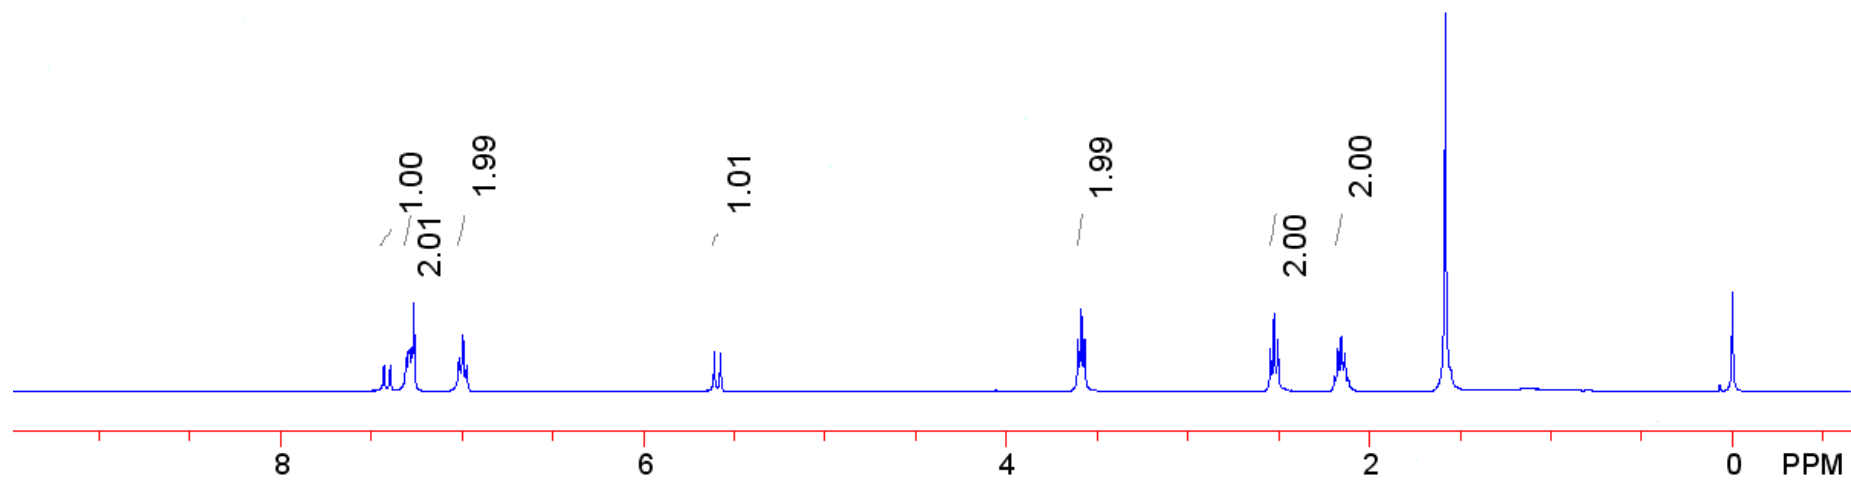



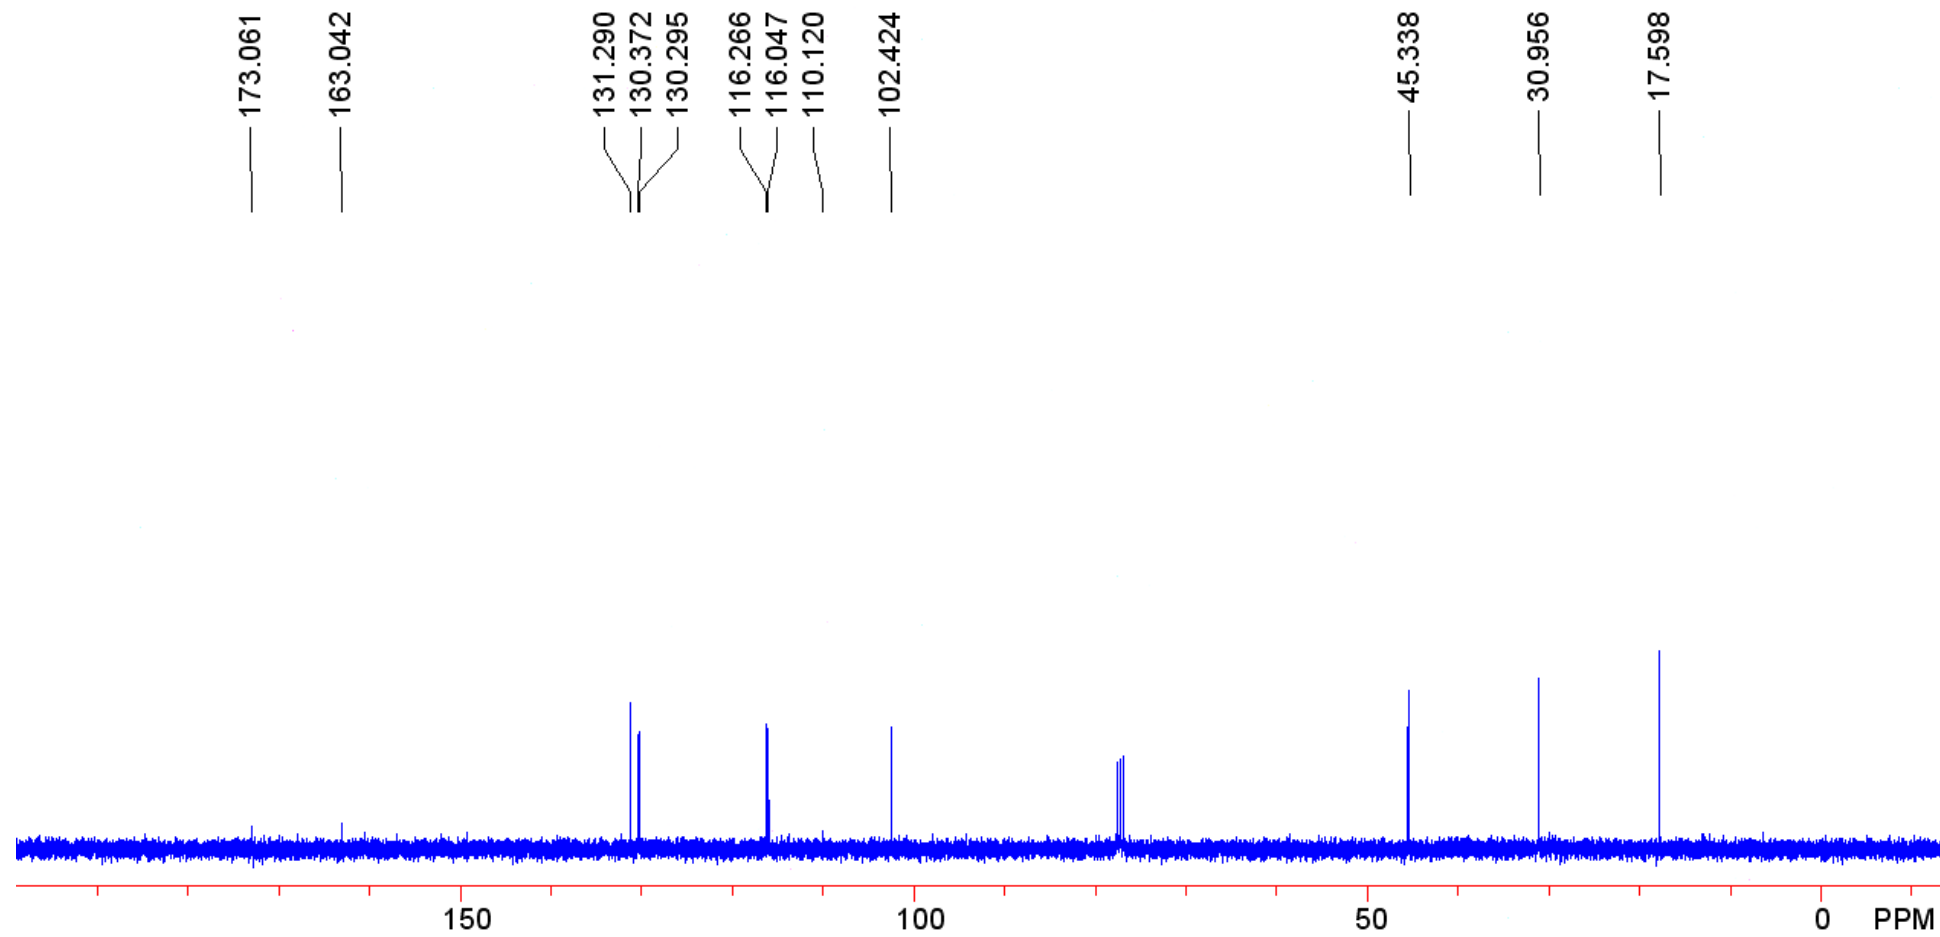

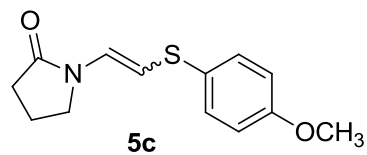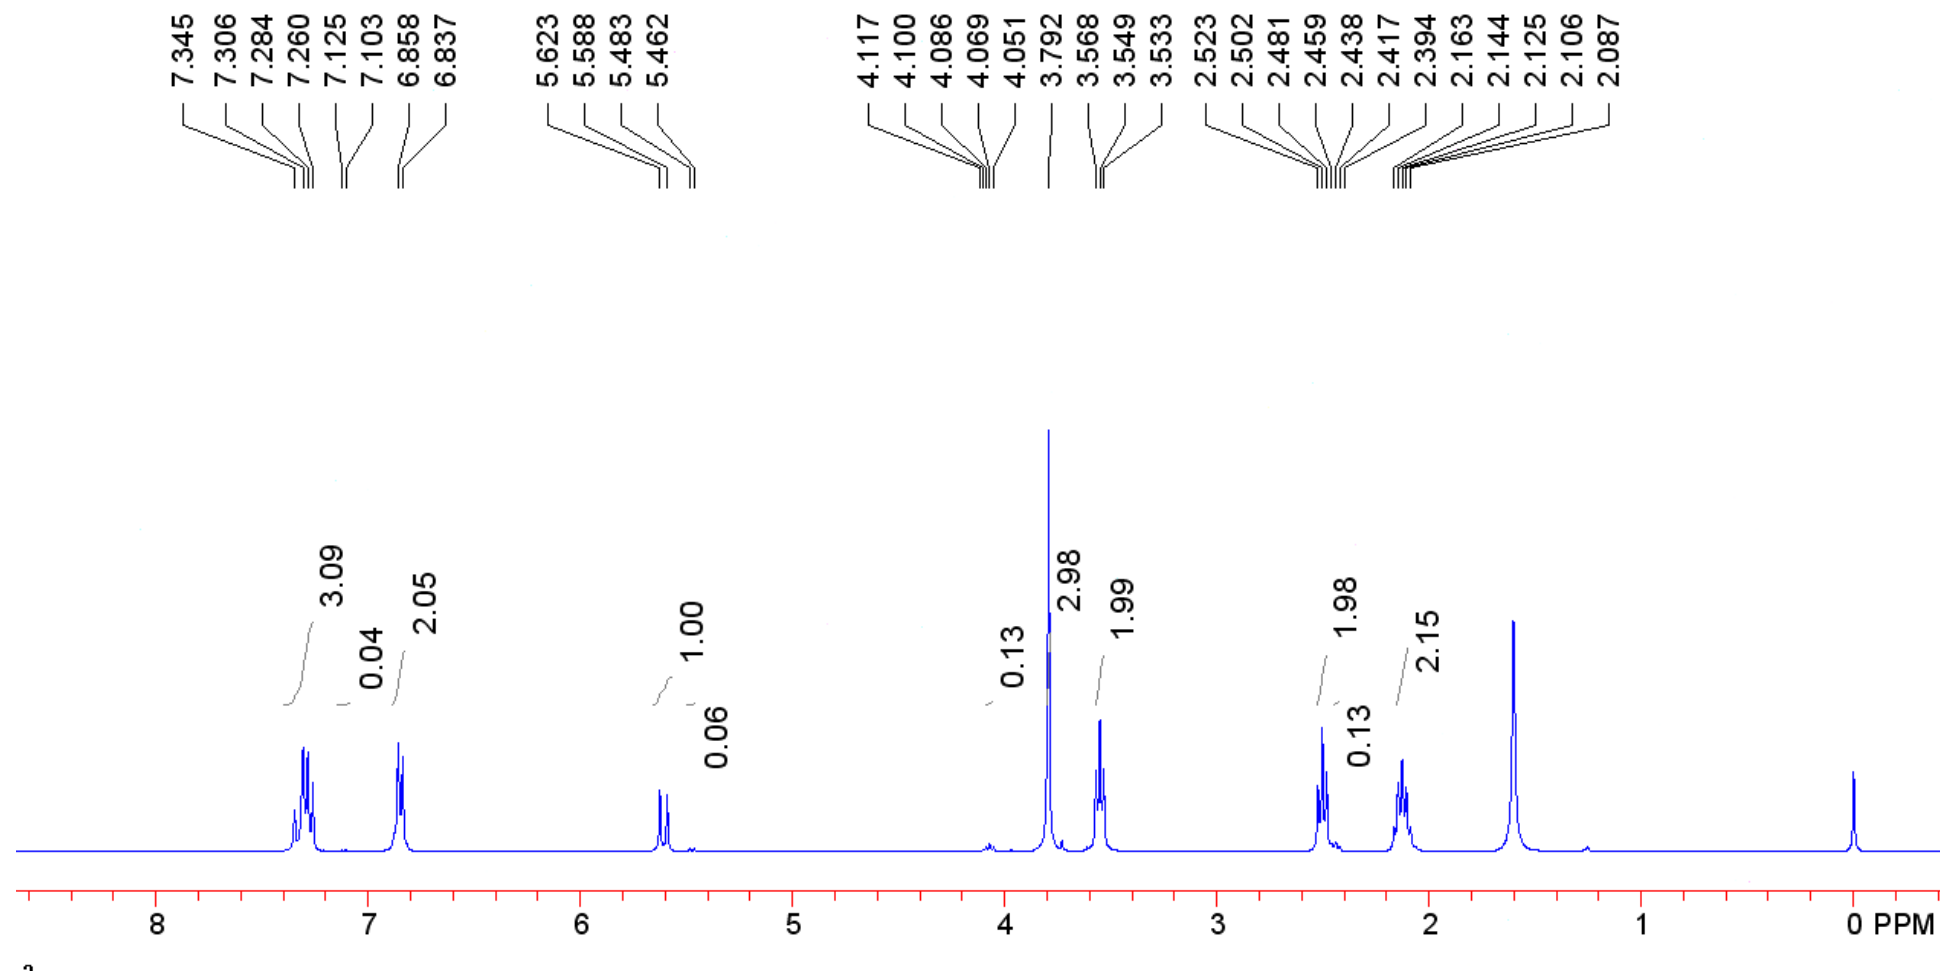

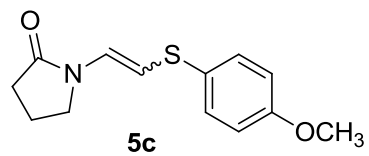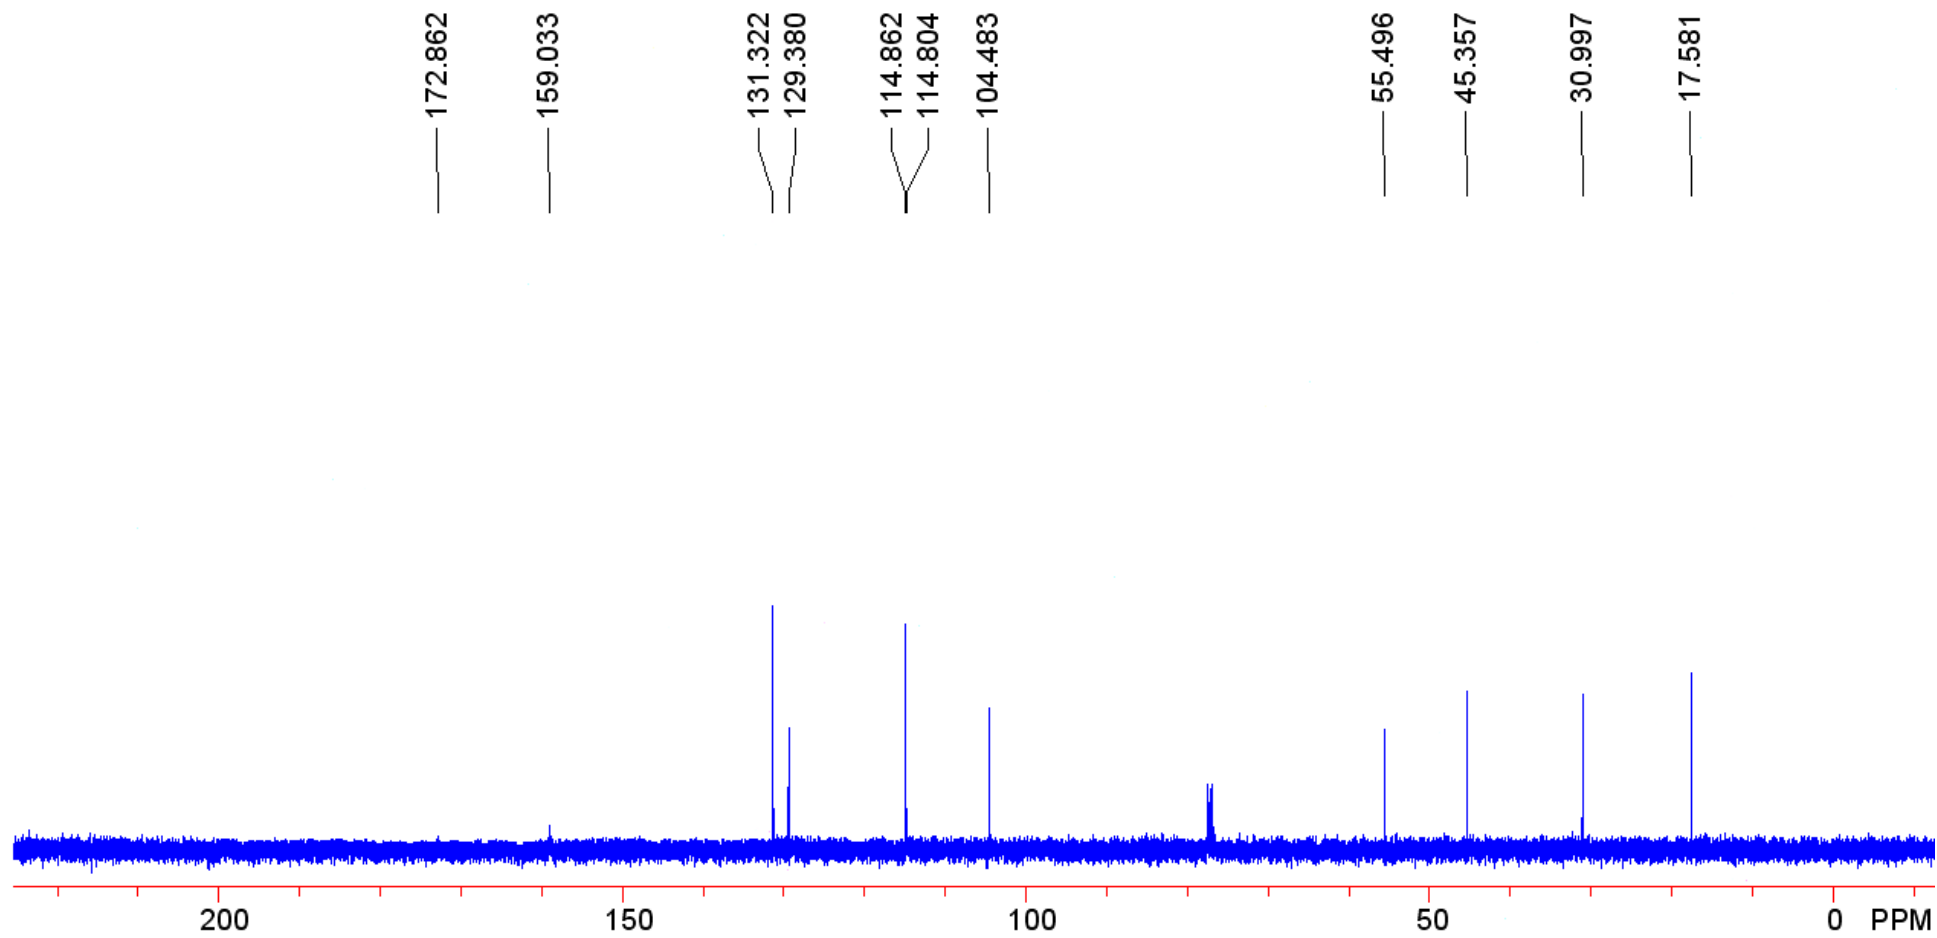

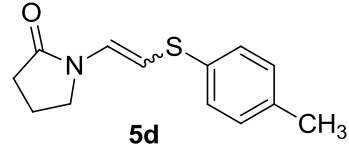

7.403  
 7.368  
 7.292  
 7.260  
 7.224  
 7.204  
 7.148  
 7.130  
 7.107  
 7.087  
 6.979  
 6.957  
 5.629  
 5.595  
 5.519  
 5.497

4.084  
 4.067  
 4.047  
 3.621  
 3.597  
 3.578  
 3.562  
 3.519

2.533  
 2.513  
 2.492  
 2.477  
 2.456  
 2.435  
 2.415  
 2.314  
 2.179  
 2.158  
 2.140  
 2.121  
 2.102  
 2.093  
 2.073  
 2.055

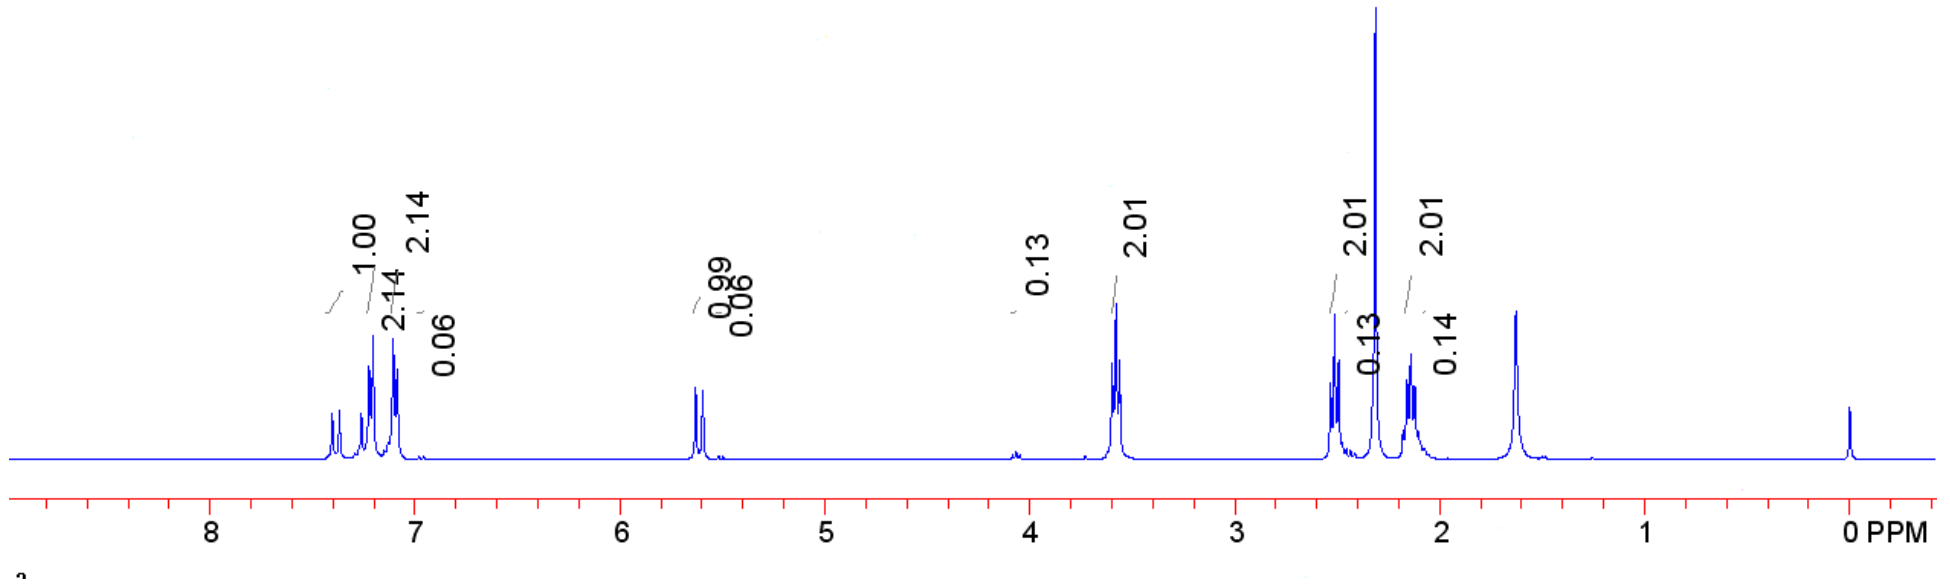

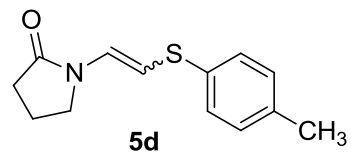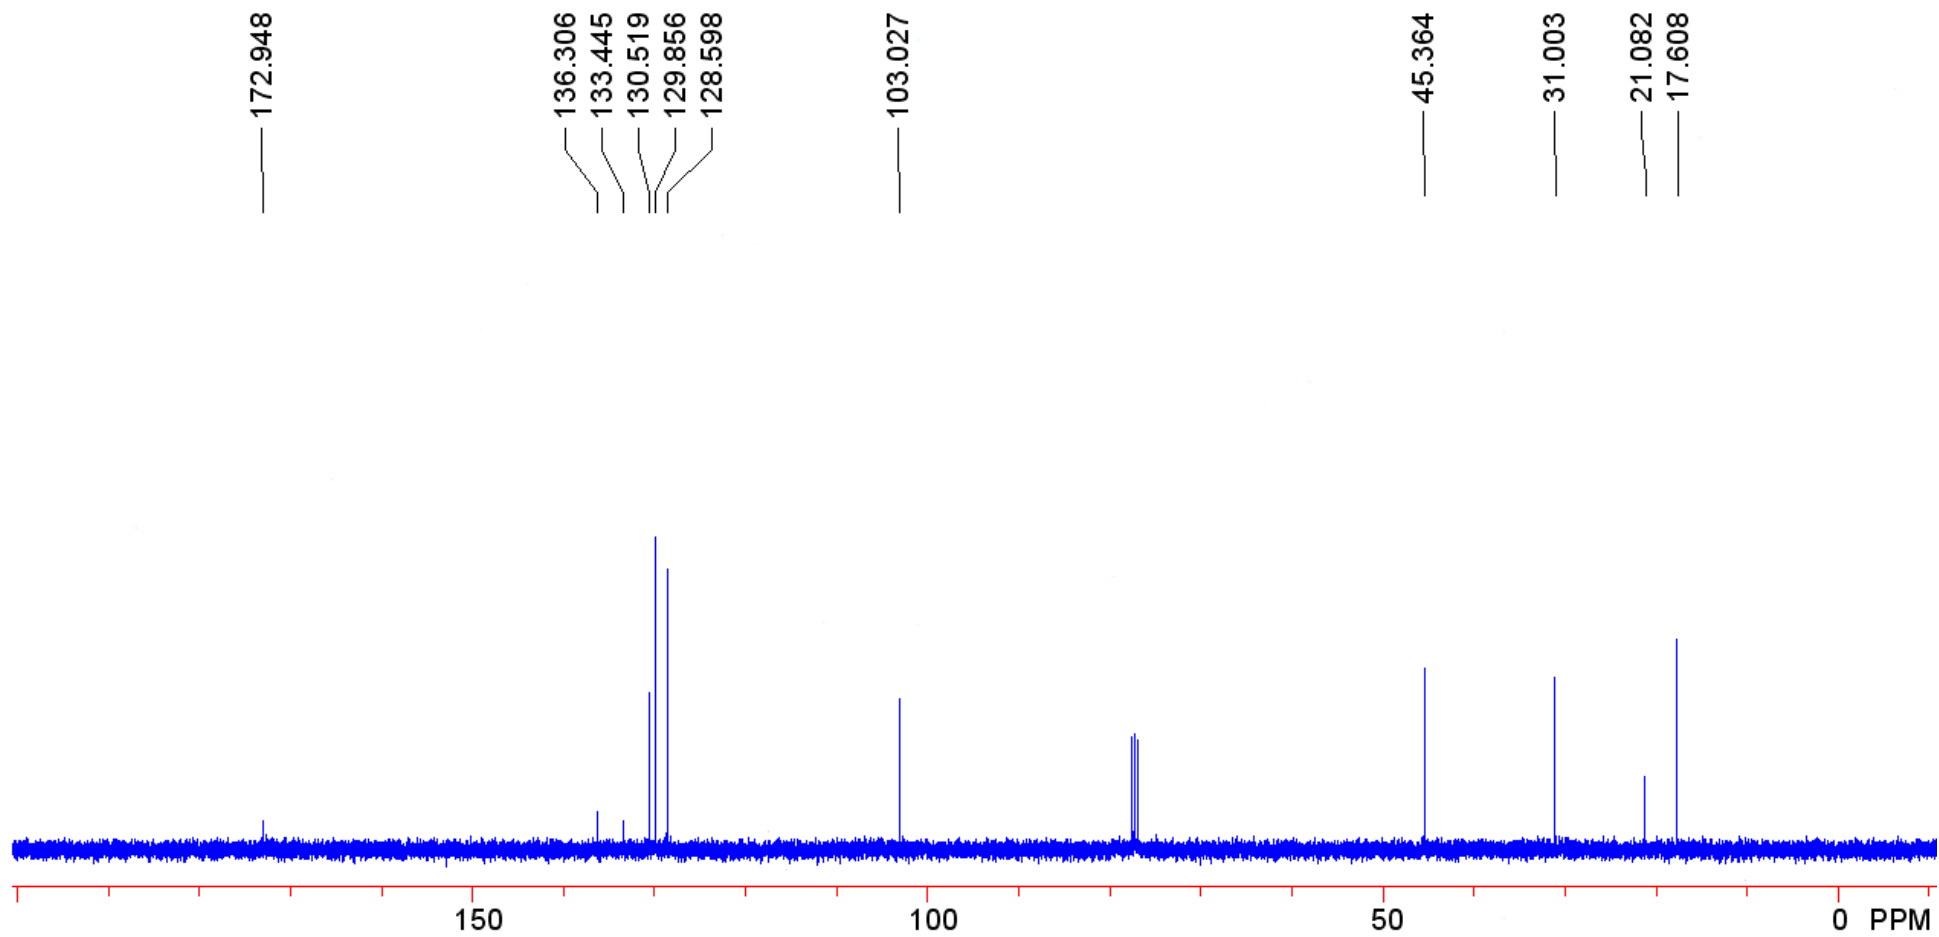

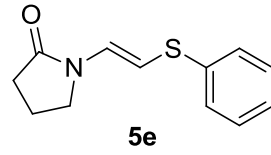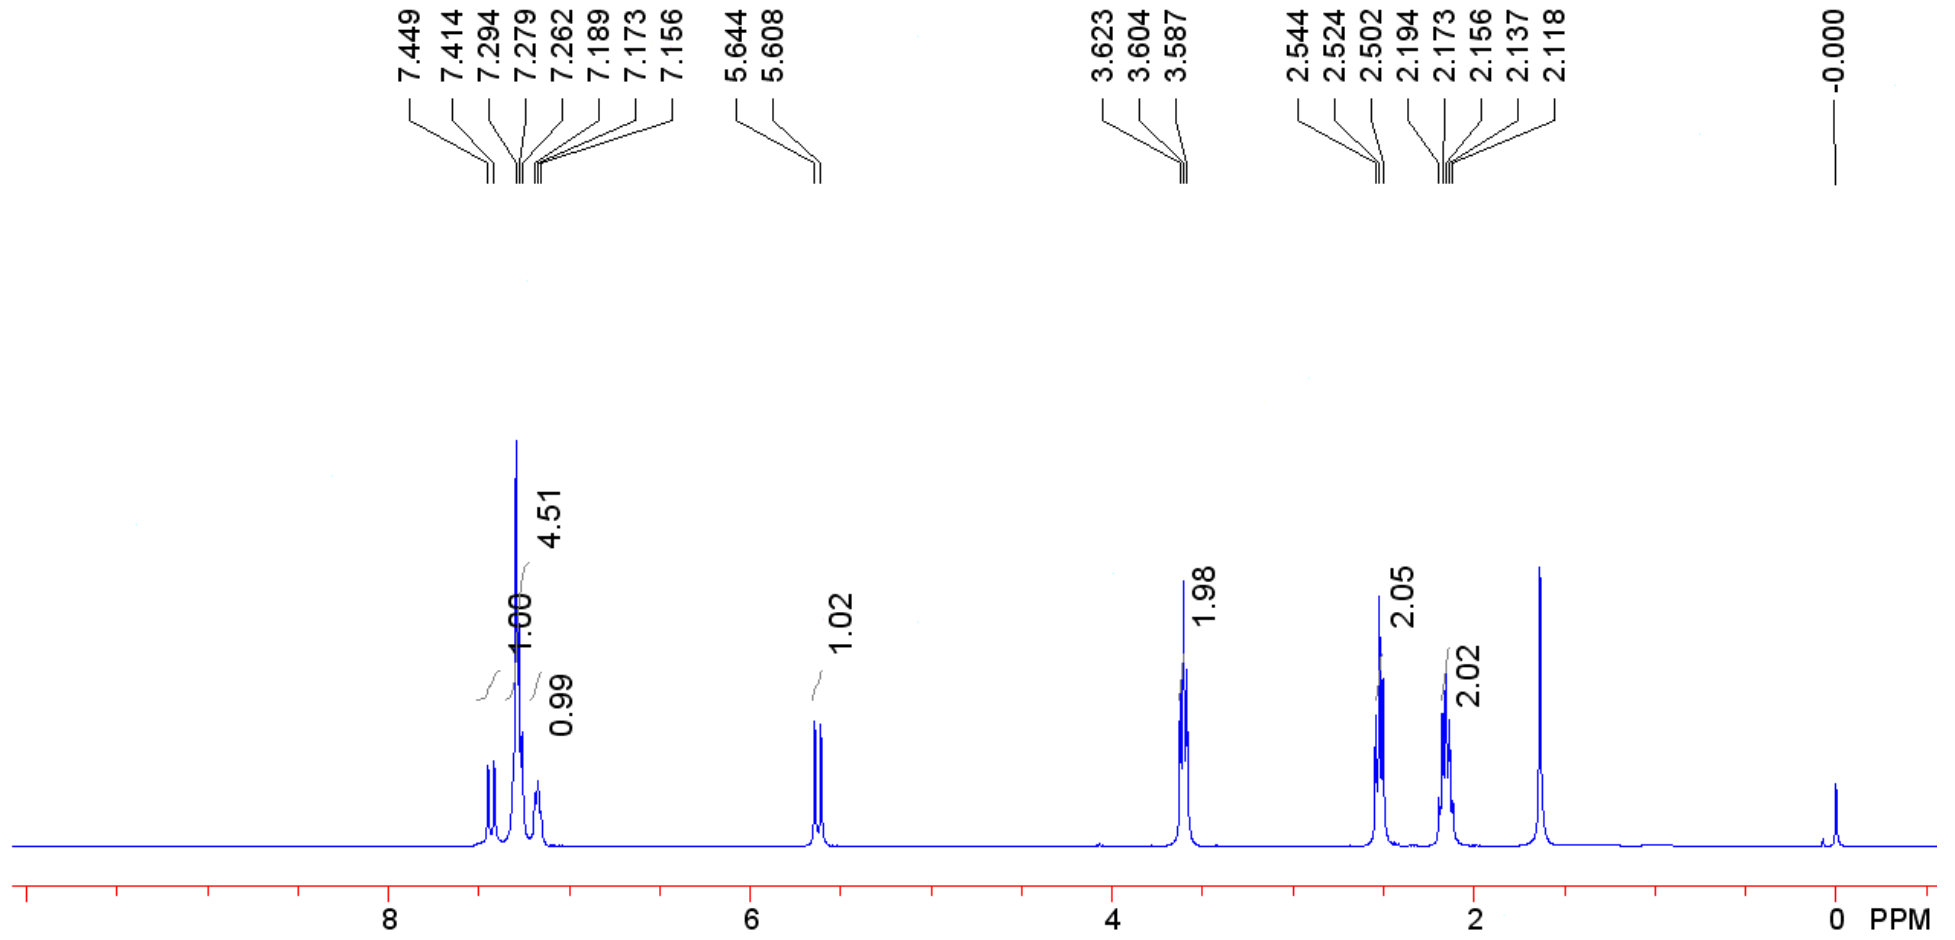

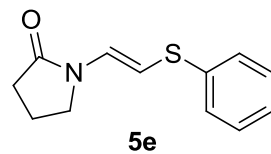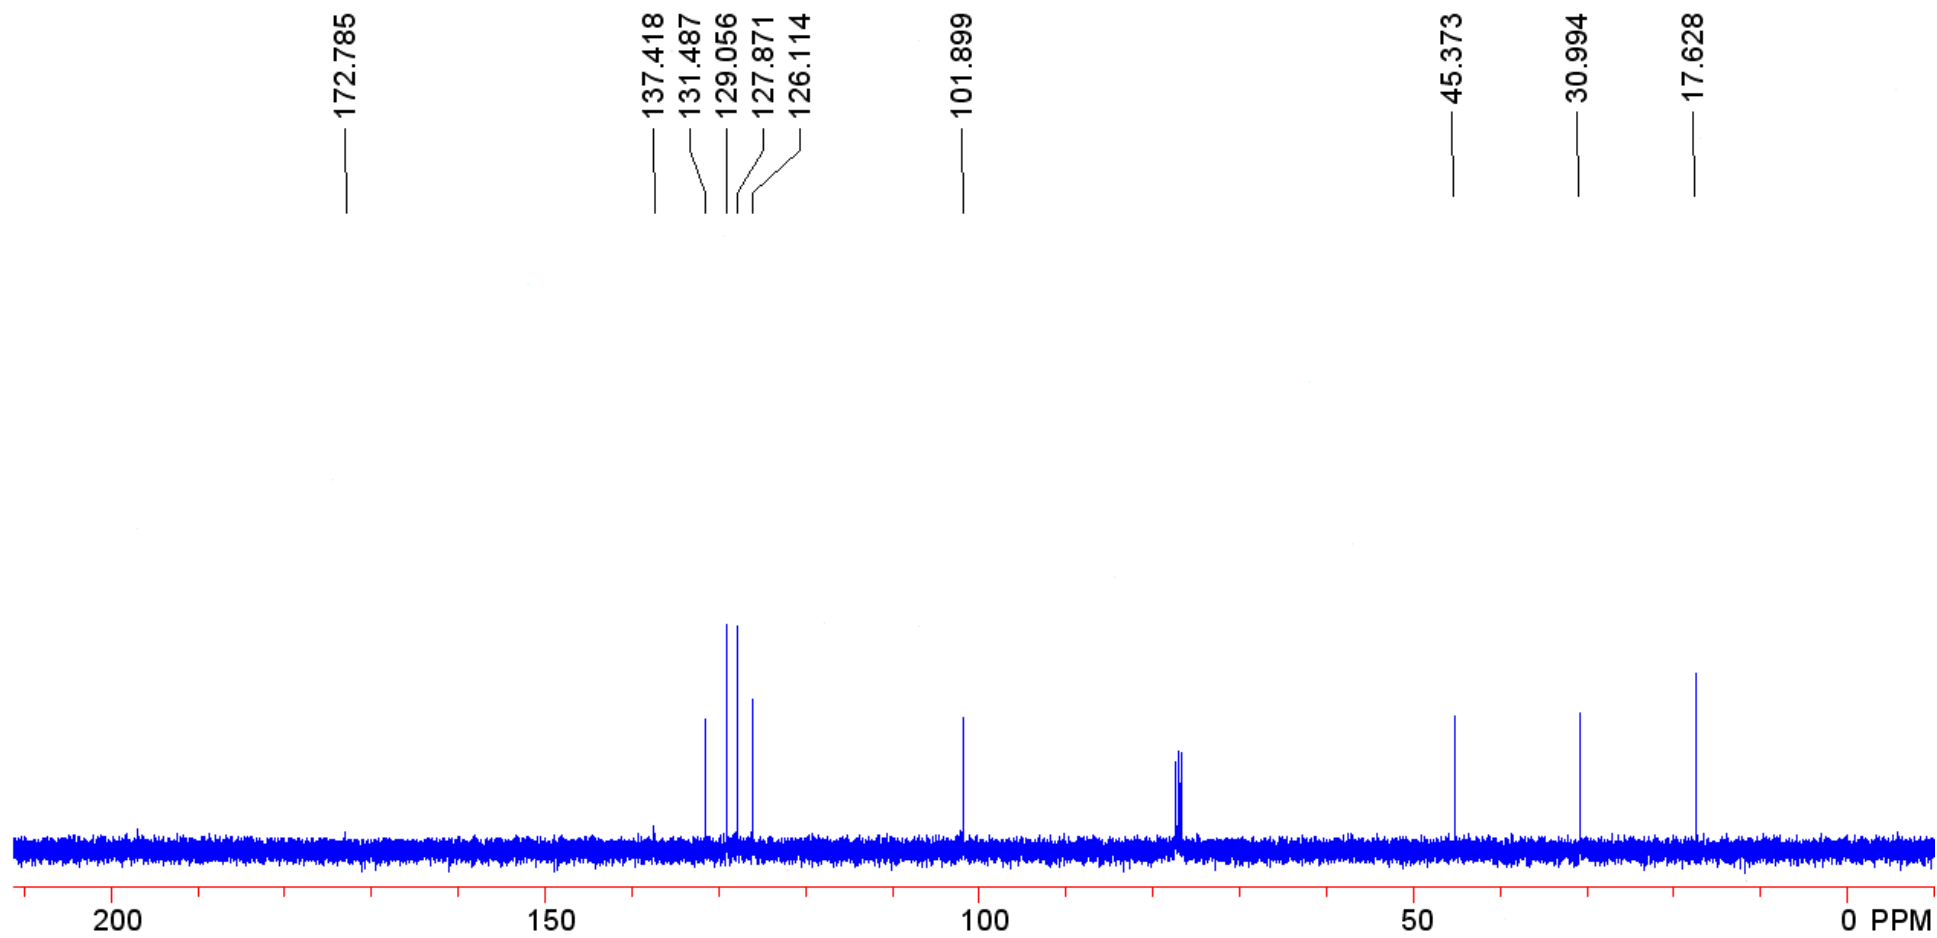

Supplement: c4ob01970a1.pdf [file c4ob01970a1.pdf]
